# Supplementary material for: A concise approach to 2-pyrrolin-5-one scaffold construction from α-halohydroxamates and β-keto compounds
Source: Royal Society of Chemistry journal article supplement (doi:10.1039/d3ob01140b), 2023-01-01

## Electronic Supplementary Information

### A Concise Approach to 2-Pyrrolin-5-one Scaffold From $\alpha$ -Halohydroxamates and $\beta$ -Keto Compounds

Wenjie Lan, Xuan Yu, Mengzhu Li, Rongchao Lei, Zhaohai Qin, Bin Fu\*

Department of Chemistry, China Agricultural University,

[fubinchem@cau.edu.cn](mailto:fubinchem@cau.edu.cn)

#### CONTENTS

|                                                                                 |    |
|---------------------------------------------------------------------------------|----|
| 1. Experimental Section.....                                                    | 2  |
| 2. General procedure for the optimal conditions.....                            | 4  |
| 3. Data for the products.....                                                   | 5  |
| 4. $^1\text{H}$ NMR, $^{13}\text{C}$ NMR and $^{19}\text{F}$ NMR Spectrum ..... | 16 |
| 5. The crystal structure data of <b>3aa</b> .....                               | 61 |
| 6. The crystal structure data of <b>7</b> .....                                 | 62 |

## 1. Experimental Section

All solvents were purified and dried according to standard methods prior to use. Flash column chromatography was performed using Qingdao Haiyang flash silica gel (100–200 mesh). The  $^1\text{H}$ ,  $^{13}\text{C}$  and  $^{19}\text{F}$  NMR spectra were obtained in  $\text{CDCl}_3$  using a Bruker-BioSpin AVANCE III HD NMR spectrometer at 500, 125 and 470 MHz, respectively. Chemical shifts are reported in parts per million ( $\delta$  value) calibrated against the residual solvent peak. The infrared spectra were recorded on a Bruker VERTEX 70 IR spectrometer as KBr pellets, with absorption reported in  $\text{cm}^{-1}$ . Mass spectra were obtained on Bruker APEX II FT-ICRMS mass spectrometer. Melting points were determined on a Stuart SMP3 melting point apparatus.

**Table S1.** The screening for the [3+2] annulation/elimination <sup>a</sup>

The reaction scheme shows the reaction of compound **1** (N-benzyloxycarbonyl-2-bromoacetaldehyde) and compound **2** (2-oxo-2-phenylacetonitrile) in the presence of a base and solvent to form intermediate **3'** (a 5-membered ring with a carbonyl, a cyano group, a hydroxyl group, and a phenyl group). Intermediate **3'** then undergoes dehydration with *p*-TsOH in  $\text{CHCl}_3$  to form the final product **3** (a 5-membered ring with a carbonyl, a cyano group, and a phenyl group).

| Entry    | Base                     | Solvent                  | Time (h)  | Yield(%) <sup>b</sup> |
|----------|--------------------------|--------------------------|-----------|-----------------------|
| 1        | $\text{K}_2\text{CO}_3$  | THF                      | 24        | 36                    |
| 2        | $\text{Na}_2\text{CO}_3$ | THF                      | 24        | trace                 |
| 3        | $\text{Cs}_2\text{CO}_3$ | THF                      | 24        | 46                    |
| <b>4</b> | <b>MeONa</b>             | <b>THF</b>               | <b>24</b> | <b>65</b>             |
| 5        | EtONa                    | THF                      | 48        | 54                    |
| 6        | <i>t</i> BuONa           | THF                      | 48        | 15                    |
| 7        | NaOH                     | THF                      | 48        | n.d. <sup>c</sup>     |
| 8        | KOH                      | THF                      | 24        | n.d                   |
| 9        | $\text{Et}_3\text{N}$    | THF                      | 24        | n.d                   |
| 10       | LDA                      | THF                      | 24        | n.d                   |
| 11       | MeONa                    | HFIP                     | 24        | n.d                   |
| 12       | MeONa                    | EtOH                     | 24        | 55                    |
| 13       | MeONa                    | $\text{Et}_2\text{O}$    | 24        | 52                    |
| 14       | MeONa                    | $\text{CHCl}_3$          | 72        | 51                    |
| 15       | MeONa                    | $\text{CH}_2\text{Cl}_2$ | 72        | 48                    |
| 16       | MeONa                    | Toluene                  | 72        | 43                    |
| 17       | MeONa                    | MeCN                     | 48        | 50                    |
| 18       | MeONa                    | DMF                      | 48        | 61                    |
| 19       | MeONa                    | Dioxane                  | 48        | 46                    |
| 20       | MeONa                    | Acetone                  | 48        | 59                    |

<sup>a</sup>All reactions were performed using **1a** (0.3mmol, 1.5 equiv.), **2a**(0.2 mmol, 1.0equiv.) and different bases(0.4mmol, 2.0 equiv.) in different solvents at room temperature under  $\text{N}_2$  atmosphere, the reaction process was monitored by TLC; <sup>b</sup> The isolated yield; <sup>c</sup> not detected the desired product.

**Table S2.** The screening for the amount of the base and the additives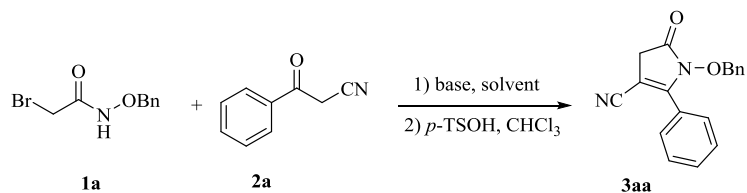

| Entry    | The ratio<br>( <b>1a</b> : <b>2a</b> : CH <sub>3</sub> ONa) | Additives  | Temp.     | Time (h)  | Yield(%)  |
|----------|-------------------------------------------------------------|------------|-----------|-----------|-----------|
| 1        | 1.5 : 1 : 2                                                 | 4 Å MS     | rt        | 24        | 66        |
| 2        | 1.5 : 1 : 2                                                 | NaI        | rt        | 24        | 85        |
| 3        | 1.5 : 1 : 1.5                                               | NaI        | rt        | 24        | 57        |
| <b>4</b> | <b>1.5 : 1 : 3</b>                                          | <b>NaI</b> | <b>rt</b> | <b>24</b> | <b>92</b> |
| 5        | 1.5 : 1 : 3                                                 | -          | rt        | 48        | 72        |
| 6        | 1.5 : 1 : 4                                                 | NaI        | rt        | 24        | 90        |
| 7        | 1.5 : 1 : 3                                                 | NaI        | 0         | 48        | 85        |
| 8        | 1.5 : 1 : 3                                                 | NaI        | 40        | 24        | 86        |
| 9        | 1 : 1.5 : 3                                                 | NaI        | rt        | 24        | 62        |

<sup>a</sup>All reactions were performed in THF(2mL) under N<sub>2</sub> atmosphere using **2a** (0.2mmol), the other reagents were added according to the corresponding ratios shown in Table S2.

**Table S3.** The optimization for the different  $\alpha$ -halohydroxamates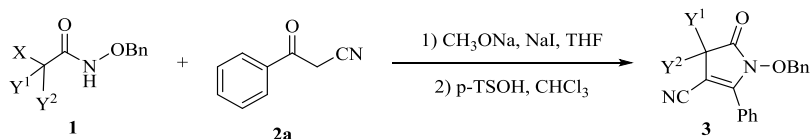

| Entry | X  | Y <sup>1</sup> . | Y <sup>2</sup>  | Temp. | Time (h) | Yield(%) <sup>b</sup> |
|-------|----|------------------|-----------------|-------|----------|-----------------------|
| 1     | Cl | H                | H               | rt    | 48       | 75                    |
| 2     | Br | CH <sub>3</sub>  | H               | rt~40 | 72       | –                     |
| 3     | Br | CH <sub>3</sub>  | CH <sub>3</sub> | rt~40 | 72       | –                     |
| 4     | Cl | H                | H               | 40    | 24       | 73                    |

<sup>a</sup>All reactions were performed in THF(2 mL) under N<sub>2</sub> atmosphere using **1** (0.3 mmol), **2a** (0.2 mmol), CH<sub>3</sub>ONa (0.6 mmol) and NaI (0.04 mmol), then *p*-TSOH(0.1mmol) in CHCl<sub>3</sub>(2.0 mL); <sup>b</sup> The isolated yield of product **3**.

**Table S4.** The optimization for the reaction of  $\beta$ -keto ester with  $\alpha$ -bromohydroxamates

| $  \begin{array}{c}  \text{Br}-\text{CH}_2-\text{C}(=\text{O})-\text{N}(\text{H})-\text{OBn} \\  \mathbf{1a}  \end{array}  +  \begin{array}{c}  \text{H}_3\text{C}-\text{C}(=\text{O})-\text{CH}_2-\text{COOC}_2\text{H}_5 \\  \mathbf{2n}  \end{array}  \xrightarrow[2) \text{ TsOH, CHCl}_3]{1) \text{ Base, NaI}}  \begin{array}{c}  \text{C}_2\text{H}_5\text{O}_2\text{C}-\text{C}(\text{CH}_3)=\text{C}(\text{N}-\text{OBn})-\text{C}(=\text{O})-\text{CH}_2-\text{C}_2\text{H}_5 \\  \mathbf{3an}  \end{array}  $ |                                   |                                  |       |          |                       |
|--------------------------------------------------------------------------------------------------------------------------------------------------------------------------------------------------------------------------------------------------------------------------------------------------------------------------------------------------------------------------------------------------------------------------------------------------------------------------------------------------------------------------|-----------------------------------|----------------------------------|-------|----------|-----------------------|
| Entry                                                                                                                                                                                                                                                                                                                                                                                                                                                                                                                    | Base                              | Solvent                          | Temp. | Time (h) | Yield(%) <sup>b</sup> |
| 1                                                                                                                                                                                                                                                                                                                                                                                                                                                                                                                        | CH <sub>3</sub> ONa               | THF                              | rt    | 24       | 37                    |
| 2                                                                                                                                                                                                                                                                                                                                                                                                                                                                                                                        | C <sub>2</sub> H <sub>5</sub> ONa | THF                              | rt    | 24       | 34                    |
| 3                                                                                                                                                                                                                                                                                                                                                                                                                                                                                                                        | <sup>t</sup> BuOK                 | THF                              | rt    | 24       | -                     |
| 4                                                                                                                                                                                                                                                                                                                                                                                                                                                                                                                        | K <sub>2</sub> CO <sub>3</sub>    | THF                              | rt    | 24       | 82                    |
| 5                                                                                                                                                                                                                                                                                                                                                                                                                                                                                                                        | Na <sub>2</sub> CO <sub>3</sub>   | THF                              | rt    | 24       | 60                    |
| 6                                                                                                                                                                                                                                                                                                                                                                                                                                                                                                                        | Cs <sub>2</sub> CO <sub>3</sub>   | THF                              | rt    | 24       | 38                    |
| 7                                                                                                                                                                                                                                                                                                                                                                                                                                                                                                                        | K <sub>2</sub> CO <sub>3</sub>    | CH <sub>3</sub> CN               | rt    | 48       | 51                    |
| 8                                                                                                                                                                                                                                                                                                                                                                                                                                                                                                                        | K <sub>2</sub> CO <sub>3</sub>    | C <sub>2</sub> H <sub>5</sub> OH | rt    | 48       | -                     |
| 9                                                                                                                                                                                                                                                                                                                                                                                                                                                                                                                        | K <sub>2</sub> CO <sub>3</sub>    | HFIP                             | rt    | 48       | -                     |
| 10                                                                                                                                                                                                                                                                                                                                                                                                                                                                                                                       | K <sub>2</sub> CO <sub>3</sub>    | CHCl <sub>3</sub>                | rt    | 48       | 25                    |
| 11                                                                                                                                                                                                                                                                                                                                                                                                                                                                                                                       | K <sub>2</sub> CO <sub>3</sub>    | DMF                              | rt    | 48       | 36                    |

<sup>a</sup>All reactions were performed in THF under N<sub>2</sub> atmosphere using **1a** (0.3 mmol), **2a** (0.2 mmol), base (0.6 mmol) and NaI (0.04 mmol); <sup>b</sup>The isolated yield of product **3**.

## 2. General procedure for the optimal conditions:

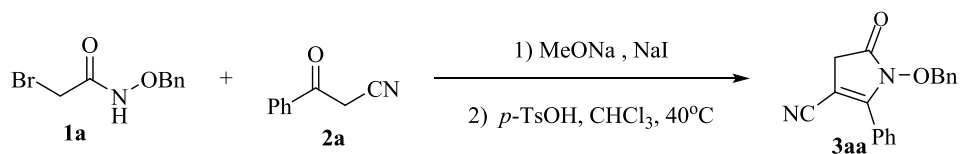

**General procedure A:** To a Schlenk tube were added compound **1a** (0.3 mmol, 1.5 eq.), **2a** (0.2 mmol, 1.0 eq.), MeONa (32 mg, 0.6 mmol, 3.0 eq.), NaI (6 mg, 0.04 mmol, 20 mol%) and THF (2.0 mL) under N<sub>2</sub>, the mixture was stirred at room temperature until the reaction was completed (monitored by TLC). The reactant was filtered through celite plate, and the solvent was removed under vacuum, subsequently a solution of *p*-TsOH (19 mg, 0.1 mmol) in CHCl<sub>3</sub> (2 mL), was added and stirred at 40°C for 1h. After removing the solvent, the residue was purified by a flash column chromatography (Petroleum ether/ EtOAc = 5:1~3:1, V/V) to afford the product **3aa**.

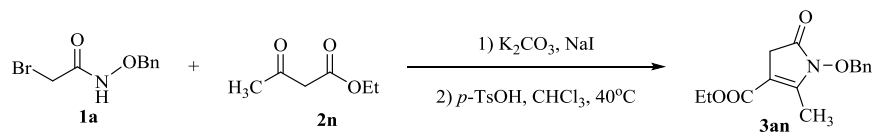

**General procedure B:** To a Schlenk tube were added compound **1a** (0.3 mmol, 1.5 eq), **2n** (0.2 mmol, 1.0 eq), K<sub>2</sub>CO<sub>3</sub> (82.8 mg, 0.6 mmol, 3.0 eq.), NaI (6 mg, 0.04 mmol, 20 mol%) and THF (2.0 mL) under N<sub>2</sub>, the mixture was stirred at room temperature until the reaction was completed (monitored by TLC). The reactant was filtered through celite plate, the solvent was removed under vacuum, and a solution of *p*-TsOH (19 mg, 0.1 mmol) in CHCl<sub>3</sub> (2 mL) was added and stirred at 40°C for 1h. After removing the solvent, the residue was purified by a flash column chromatography (Petroleum ether/ EtOAc = 5:1~3:1, V/V) to afford the product **3an**.

### 3. Data for the products

#### 1-(benzyloxy)-5-oxo-2-phenyl-4,5-dihydro-1H-pyrrole-3-carbonitrile (**3aa**)

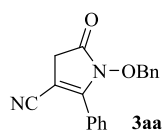

Following the **General procedure A**, **3aa** (53.3 mg) was isolated as a white solid in 92% yield, Mp: 137–139 °C.  $^1\text{H}$  NMR (500 MHz,  $\text{CDCl}_3$ )  $\delta$  7.57–7.50 (m, 3H), 7.48–7.43 (m, 2H), 7.32–7.27 (m, 1H), 7.23–7.18 (m, 2H), 7.06–7.01 (m, 2H), 4.89 (s, 2H), 3.38 (s, 2H);  $^{13}\text{C}$  NMR (125 MHz,  $\text{CDCl}_3$ )  $\delta$  169.1, 156.6, 132.4, 131.5, 130.0, 129.4, 128.7, 128.6, 128.5, 125.6, 115.5, 79.5, 78.8, 35.3; HRMS ESI Calcd for  $\text{C}_{18}\text{H}_{14}\text{N}_2\text{NaO}_2$   $[\text{M}+\text{Na}]^+$ : 313.0947, Found: 313.0948. IR (KBr): 3027, 2923, 2852, 1745, 1598, 1494, 1454, 1341, 1165, 1091, 1038  $\text{cm}^{-1}$ .

#### 1-(benzyloxy)-5-oxo-2-(p-methyl phenyl)-4,5-dihydro-1H-pyrrole-3-carbonitrile (**3ab**)

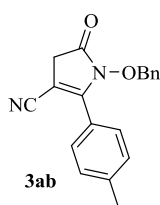

Following the **General procedure A**, **3ab** (48.6 mg) was isolated as a white solid in 80% yield, Mp: 114–116 °C.  $^1\text{H}$  NMR (500 MHz,  $\text{CDCl}_3$ )  $\delta$  7.50–7.46 (m, 2H), 7.33–7.26 (m, 3H), 7.24–7.20 (m, 2H), 7.10–7.06 (m, 2H), 4.88 (s, 2H), 3.36 (s, 2H), 2.44 (s, 3H);  $^{13}\text{C}$  NMR (125 MHz,  $\text{CDCl}_3$ )  $\delta$  169.23, 156.61, 142.19, 132.54, 130.03, 129.50, 129.42, 128.51, 128.46, 122.79, 115.73, 78.77, 77.20, 35.25, 21.61. HRMS ESI Calcd for  $\text{C}_{19}\text{H}_{16}\text{N}_2\text{NaO}_2$   $[\text{M}+\text{Na}]^+$ : 327.1104, Found: 327.1103. IR (KBr): 3027, 2923, 2852, 1745, 1598, 1494, 1454, 1341, 1165, 1091, 1038  $\text{cm}^{-1}$ .

#### 1-(benzyloxy)-5-oxo-2-(p-methoxy phenyl)-4,5-dihydro-1H-pyrrole-3-carbonitrile (**3ac**)

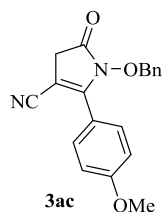

Following the General procedure A, **3ac** (48.5 mg) was isolated as a white solid in 76% yield, Mp: 104–107 °C.  $^1\text{H}$  NMR (500 MHz,  $\text{CDCl}_3$ )  $\delta$  7.58–7.53 (m, 2H), 7.33–7.29 (m, 1H), 7.25–7.21 (m, 2H), 7.11–7.06 (m, 2H), 6.99–6.94 (m, 2H), 4.88 (s, 2H), 3.88 (s, 3H), 3.34 (s, 2H).  $^{13}\text{C}$  NMR (125 MHz,  $\text{CDCl}_3$ )  $\delta$  169.3, 162.1, 156.2, 132.6, 130.4, 130.1, 129.5, 128.5, 118.0, 116.0, 114.2, 78.8, 77.8, 55.5, 35.2. HRMS ESI Calcd for  $\text{C}_{19}\text{H}_{16}\text{N}_2\text{NaO}_3$   $[\text{M}+\text{Na}]^+$ : 343.1053, Found: 343.1055. IR (KBr): 3027, 2923, 2852, 1745, 1598, 1494, 1454, 1341, 1165, 1091, 1038  $\text{cm}^{-1}$ .

#### 1-(benzyloxy)-5-oxo-2-(p-fluorophenyl)-4,5-dihydro-1H-pyrrole-3-carbonitrile (**3ad**)

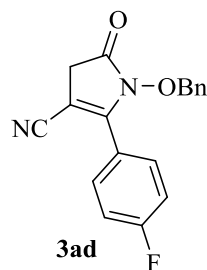

Following the General procedure A, **3ad** (44.3 mg) was isolated as a white solid in 72% yield. Mp: 136–138 °C.  $^1\text{H}$  NMR (500 MHz,  $\text{CDCl}_3$ )  $\delta$  7.53–7.48 (m, 2H), 7.33–7.28 (m, 1H), 7.24–7.19 (m, 2H), 7.16–7.11 (m, 2H), 7.05–7.01 (m, 2H), 4.91 (s, 2H), 3.38 (s, 2H).  $^{13}\text{C}$  NMR (125 MHz,  $\text{CDCl}_3$ )  $\delta$  169.0, 164.3 (d,  $J = 253.8$  Hz), 155.7, 132.4, 131.0 (d,  $J = 8.7$  Hz), 130.1, 129.60, 128.6, 121.8 (d,  $J = 3.4$  Hz), 116.0 (d,  $J = 22.0$  Hz), 115.4, 79.4, 78.9, 35.3.  $^{19}\text{F}$  NMR (471 MHz,  $\text{CDCl}_3$ )  $\delta$  -106.58. HRMS ESI Calcd for  $\text{C}_{18}\text{H}_{13}\text{FN}_2\text{NaO}_2$   $[\text{M}+\text{Na}]^+$ : 331.0853, Found: 331.0854. IR (KBr): 3027, 2923, 2852, 1745, 1598, 1494, 1454, 1341, 1165, 1091, 1038  $\text{cm}^{-1}$ .

#### 1-(4-bromobenzyloxy)-5-oxo-2-phenyl-4,5-dihydro-1H-pyrrole-3-carbonitrile (**3ae**)

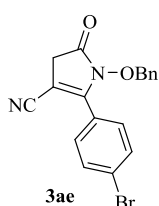

Following the General procedure A, **3ae** (53.8 mg) was isolated as a white solid in 73% yield. Mp: 134–136 °C.  $^1\text{H}$  NMR (500 MHz,  $\text{CDCl}_3$ )  $\delta$  7.60–7.55 (m, 2H), 7.36–7.33 (m, 2H), 7.33–7.29 (m, 1H), 7.24–7.19 (m, 2H), 7.07–7.00 (m, 2H), 4.92 (s, 2H), 3.36 (s, 2H).  $^{13}\text{C}$  NMR (125 MHz,  $\text{CDCl}_3$ )  $\delta$  168.9, 155.6, 132.3,

132.0, 130.1, 130.0, 129.6, 128.6, 126.2, 124.5, 115.2, 79.7, 78.9, 35.3. HRMS ESI Calcd for  $C_{18}H_{13}BrN_2NaO_2$   $[M+Na]^+$ : 391.0053, Found: 391.0052. IR (KBr): 3027, 2923, 2852, 1745, 1598, 1494, 1454, 1341, 1165, 1091, 1038  $cm^{-1}$ .

**Methyl 4-(1-(benzyloxy)-3-cyano-5-oxo-4,5-dihydro-1H-pyrrol-2-yl)benzoate**

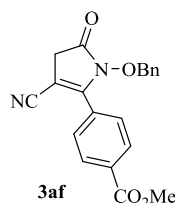

Following the General procedure A, **3af** (48.7 mg) was isolated as a white solid in 70% yield. Mp: 121–123 °C.  $^1H$  NMR (500 MHz,  $CDCl_3$ )  $\delta$  8.09 (d,  $J$  = 8.3 Hz, 1H), 7.55 (d,  $J$  = 8.3 Hz, 1H), 7.30 (t,  $J$  = 7.4 Hz, 1H), 7.18 (t,  $J$  = 7.6 Hz, 1H), 7.00 (d,  $J$  = 7.4 Hz, 1H), 4.93 (s, 1H), 3.98 (s, 2H), 3.40 (s, 1H).  $^{13}C$  NMR (125 MHz,  $CDCl_3$ )  $\delta$  168.92, 166.03, 155.74, 132.57, 132.32, 130.17, 129.76, 129.67, 129.65, 128.71, 128.63, 115.01, 80.77, 78.91, 52.55, 35.48. HRMS ESI Calcd for  $C_{20}H_{16}N_2NaO_4$   $[M+Na]^+$ : 371.1002, Found: 371.1000. IR (KBr): 2956, 2209, 1725, 1436, 1410, 1379, 1354, 1315, 1279, 1231, 1188, 1166, 1110, 772, 753, 701  $cm^{-1}$ .

**1-(benzyloxy)-5-oxo-2-(*m*-methoxyphenyl)-4,5-dihydro-1H-pyrrole-3-carbonitrile**

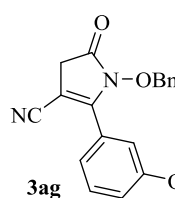

Following the General procedure A, **3ag** (54.4 mg) was isolated as a white solid in 85% yield. Mp: 86–88 °C.  $^1H$  NMR (500 MHz,  $CDCl_3$ )  $\delta$  7.37 (t,  $J$  = 8.0 Hz, 1H), 7.33–7.28 (m, 1H), 7.21 (t,  $J$  = 7.6 Hz, 2H), 7.15 (dt,  $J$  = 7.6, 1.2 Hz, 1H), 7.10–7.04 (m, 3H), 7.03 (t,  $J$  = 2.1 Hz, 1H), 4.89 (s, 2H), 3.79 (s, 3H), 3.37 (s, 2H).  $^{13}C$  NMR (125 MHz,  $CDCl_3$ )  $\delta$  169.1, 159.5, 156.4, 132.5, 130.1, 129.8, 129.4, 128.5, 126.6, 120.9, 117.9, 115.4, 113.4, 79.6, 78.9, 55.8, 35.3. HRMS ESI Calcd for  $C_{19}H_{16}N_2NaO_3$   $[M+Na]^+$ : 343.1053, Found: 343.1054. IR (KBr): 3027, 2923, 2852, 1745, 1598, 1494, 1454, 1341, 1165, 1091, 1038  $cm^{-1}$ .

**1-(benzyloxy)-5-oxo-2-(*m*-chlorophenyl)-4,5-dihydro-1H-pyrrole-3-carbonitrile**

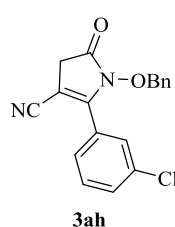

Following the General procedure A, **3ah** (46.0 mg) was isolated as a white solid in 71% yield. Mp: 94–96 °C.  $^1H$  NMR (500 MHz,  $CDCl_3$ )  $\delta$  7.48 (dt,  $J$  = 7.5, 1.9 Hz, 1H), 7.41–7.34 (m, 3H), 7.34–7.30 (m, 1H), 7.22–7.18 (m, 2H), 7.04–6.99 (m, 2H), 4.93 (s, 2H), 3.39 (s, 2H).  $^{13}C$  NMR (125 MHz,  $CDCl_3$ )  $\delta$  168.9, 155.3, 134.7, 132.3, 131.4, 130.2, 129.9, 129.6, 128.6, 128.5, 127.2, 126.8, 114.9, 80.3, 78.9, 35.4. HRMS ESI Calcd for  $C_{18}H_{13}ClN_2NaO_2$   $[M+Na]^+$ : 347.0558, Found: 347.0558. IR (KBr): 3027, 2923, 2852, 1745, 1598, 1494, 1454, 1341, 1165, 1091, 1038  $cm^{-1}$ .

**1-(benzyloxy)-5-oxo-2-(*o*-methoxyphenyl)-4,5-dihydro-1H-pyrrole-3-carbonitrile**

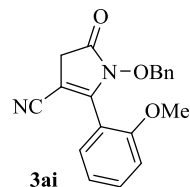

Following the General procedure A, **3ai** (41.6 mg) was isolated as a white solid in 65% yield. Mp: 102–104 °C.  $^1H$  NMR (500 MHz,  $CDCl_3$ )  $\delta$  7.49 (ddd,  $J$  = 8.8, 7.6, 1.7 Hz, 1H), 7.30–7.26 (m, 1H), 7.23–7.17 (m, 3H), 7.03–6.95 (m, 4H), 4.89 (s, 2H), 3.81 (s, 3H), 3.38 (s, 2H).  $^{13}C$  NMR (125 MHz,  $CDCl_3$ )  $\delta$  169.3, 157.4, 154.9, 133.1, 132.9, 130.9, 129.7, 129.1, 128.5, 120.6, 115.1, 115.0, 111.4, 81.9, 78.8, 55.6, 35.6. HRMS ESI Calcd for  $C_{19}H_{16}N_2NaO_3$   $[M+Na]^+$ : 343.1053, Found: 343.1057. IR (KBr): 3027, 2923, 2852, 1745, 1598, 1494, 1454, 1341, 1165, 1091, 1038  $cm^{-1}$ .

**1-(benzyloxy)-5-oxo-2-(2-furyl)-4,5-dihydro-1H-pyrrole-3-carbonitrile**

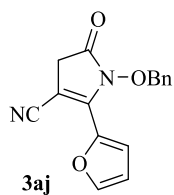

Following the General procedure A, **3aj** (43.6 mg) was isolated as a slightly yellow solid in 78% yield. Mp: 115–118 °C. <sup>1</sup>H NMR (500 MHz, CDCl<sub>3</sub>) δ 7.69 (d, *J* = 1.6 Hz, 1H), 7.45 – 7.36 (m, 5H), 7.15 (d, *J* = 3.6 Hz, 1H), 6.57 (dd, *J* = 3.7, 1.8 Hz, 1H), 5.15 (s, 2H), 3.38 (s, 2H). <sup>13</sup>C NMR (126 MHz, CDCl<sub>3</sub>) δ 168.9, 146.0, 144.3, 140.9, 132.7, 129.9, 129.6, 128.7, 115.9, 115.6, 112.6, 79.3, 75.5, 35.3. HRMS ESI Calcd for C<sub>16</sub>H<sub>12</sub>N<sub>2</sub>NaO<sub>3</sub> [M+Na]<sup>+</sup>: 303.0740, Found: 303.0739. IR (KBr): 3027, 2923, 2852, 1745, 1598, 1494, 1454, 1341, 1165, 1091, 1038 cm<sup>-1</sup>.

#### 1-(benzyloxy)-5-oxo-2-(2-thiophenyl)-4,5-dihydro-1H-pyrrole-3-carbonitrile

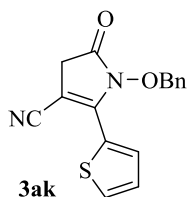

Following the General procedure A, **3ak** (39.1 mg) was isolated as a slightly yellow solid in 66% yield. Mp: 138–140 °C. <sup>1</sup>H NMR (500 MHz, CDCl<sub>3</sub>) δ 7.97 (d, *J* = 3.8 Hz, 1H), 7.64 (dd, *J* = 5.1, 1.0 Hz, 1H), 7.35 (qd, *J* = 8.3, 7.7, 4.6 Hz, 5H), 7.19 (dd, *J* = 5.0, 3.9 Hz, 1H), 5.10 (s, 2H), 3.39 (s, 2H). <sup>13</sup>C NMR (125 MHz, CDCl<sub>3</sub>) δ 168.8, 149.1, 132.4, 131.9, 131.4, 130.1, 129.6, 128.6, 127.9, 125.7, 116.2, 79.3, 76.1, 35.2. HRMS ESI Calcd for C<sub>19</sub>H<sub>16</sub>N<sub>2</sub>NaO<sub>2</sub>S [M+Na]<sup>+</sup>: 319.0512, Found: 319.0512. IR (KBr): 3027, 2923, 2852, 1745, 1598, 1494, 1454, 1341, 1165, 1091, 1038 cm<sup>-1</sup>.

#### 1-(benzyloxy)-2-methyl-5-oxo-4,5-dihydro-1H-pyrrole-3-carbonitrile

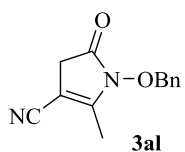

Following the General procedure A, **3al** (36.9 mg) was isolated as a white solid in 81% yield. Mp: 90–92 °C. <sup>1</sup>H NMR (500 MHz, CDCl<sub>3</sub>) δ 7.46 – 7.34 (m, 5H), 5.09 (s, 2H), 3.21 (q, *J* = 2.4 Hz, 2H), 1.87 (t, *J* = 2.4 Hz, 3H). <sup>13</sup>C NMR (125 MHz, CDCl<sub>3</sub>) δ 169.5, 157.0, 133.4, 130.1, 129.8, 128.9, 114.8, 79.2, 79.1, 34.8, 11.9. HRMS ESI Calcd for C<sub>13</sub>H<sub>12</sub>N<sub>2</sub>NaO<sub>2</sub> [M+Na]<sup>+</sup>: 251.0791, Found: 251.0791. IR (KBr): 3027, 2923, 2852, 1745, 1598, 1494, 1454, 1341, 1165, 1091, 1038 cm<sup>-1</sup>.

#### 1-(benzyloxy)-2-isopropyl-5-oxo-4,5-dihydro-1H-pyrrole-3-carbonitrile

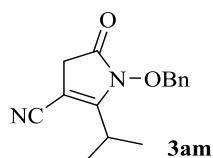

Following the General procedure A, **3am** (39.4 mg) was isolated as a white solid in 77% yield. Mp: 218.5–219.5 °C. <sup>1</sup>H NMR (500 MHz, CDCl<sub>3</sub>) δ 7.41 (s, 5H), 5.13 (s, 2H), 3.21 (s, 2H), 2.74 (hept, *J* = 7.0 Hz, 1H), 1.22 (d, *J* = 7.2 Hz, 6H). <sup>13</sup>C NMR (125 MHz, CDCl<sub>3</sub>) δ 169.6, 165.1, 133.2, 129.9, 129.6, 128.8, 115.1, 78.8, 76.8, 35.3, 26.9, 19.8. HRMS ESI Calcd for C<sub>15</sub>H<sub>16</sub>N<sub>2</sub>NaO<sub>2</sub> [M+Na]<sup>+</sup>: 279.1104, Found: 279.1104. IR (KBr): 3027, 2923, 2852, 1745, 1598, 1494, 1454, 1341, 1165, 1091, 1038 cm<sup>-1</sup>.

#### Ethyl 1-(benzyloxy)-2-methyl-5-oxo-4,5-dihydro-1H-pyrrole-3-carboxylate

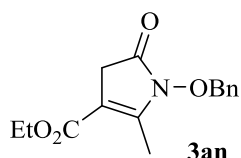

Following the General procedure B, **3an** (45.1 mg) was isolated as a white solid in 82% yield. Mp: 44–46 °C. <sup>1</sup>H NMR (500 MHz, CDCl<sub>3</sub>) δ 7.48–7.35 (m, 5H), 5.10 (s, 2H), 4.18 (q, *J* = 7.1 Hz, 2H), 3.24 (q, *J* = 2.4 Hz, 2H), 2.14 (t, *J* = 2.4 Hz, 3H), 1.27 (t, *J* = 7.1 Hz, 3H). <sup>13</sup>C NMR (125 MHz, CDCl<sub>3</sub>) δ 170.9, 163.7, 153.2, 133.7, 130.0, 129.5, 128.7, 99.6, 78.9, 59.9, 34.5, 14.3, 11.0. HRMS ESI Calcd for C<sub>15</sub>H<sub>17</sub>NNaO<sub>4</sub> [M+Na]<sup>+</sup>: 298.1050, Found: 298.1057. IR (KBr): 3027, 2923, 2852, 1745, 1598, 1494, 1454, 1341, 1165, 1091, 1038 cm<sup>-1</sup>.

#### Ethyl 1-(benzyloxy)-2-phenyl-5-oxo-4,5-dihydro-1H-pyrrole-3-carboxylate

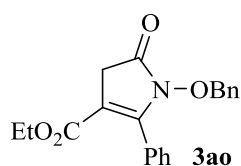

Following the General procedure B, **3ao** (32.4 mg) was isolated as a white solid in 45% yield. Mp: 69–71 °C.  $^1\text{H}$  NMR (500 MHz,  $\text{CDCl}_3$ )  $\delta$  7.50–7.46 (m, 1H), 7.43–7.36 (m, 4H), 7.30–7.26 (m, 1H), 7.22–7.18 (m, 2H), 6.96–6.92 (m, 2H), 4.79 (s, 2H), 4.06 (q,  $J$  = 7.1 Hz, 2H), 3.43 (s, 2H), 1.10 (t,  $J$  = 7.1 Hz, 3H).  $^{13}\text{C}$  NMR (125 MHz,  $\text{CDCl}_3$ )  $\delta$  170.7, 162.8, 152.9, 133.0, 130.1, 129.9, 129.8, 129.1, 128.4, 127.6, 127.2, 101.4, 78.7, 60.1, 35.1, 14.0. HRMS ESI Calcd for  $\text{C}_{20}\text{H}_{19}\text{NNaO}_4$   $[\text{M}+\text{Na}]^+$ : 360.1206, Found: 360.1201. IR (KBr): 3027, 2923, 2852, 1745, 1598, 1494, 1454, 1341, 1165, 1091, 1038  $\text{cm}^{-1}$ .

#### 4-acetyl 1-(benzyloxy)-5-methyl-1,3-dihydro-2H-pyrrol-2-one

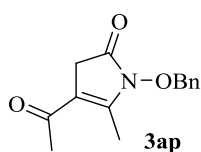

Following the General procedure B, **3ap** (35.3 mg) was isolated as a white solid in 72% yield. Mp: 106–108 °C.  $^1\text{H}$  NMR (500 MHz,  $\text{CDCl}_3$ )  $\delta$  7.45–7.36 (m, 5H), 5.11 (s, 2H), 3.29 (q,  $J$  = 2.4 Hz, 2H), 2.19 (s, 3H), 2.16 (t,  $J$  = 2.3 Hz, 3H).  $^{13}\text{C}$  NMR (126 MHz,  $\text{CDCl}_3$ )  $\delta$  192.3, 170.4, 152.6, 133.6, 130.0, 129.6, 128.8, 108.4, 79.0, 34.9, 29.0, 11.6. HRMS ESI Calcd for  $\text{C}_{14}\text{H}_{15}\text{NNaO}_3$   $[\text{M}+\text{Na}]^+$ : 268.0944, Found: 268.0945. IR (KBr): 3027, 2923, 2852, 1745, 1598, 1494, 1454, 1341, 1165, 1091, 1038  $\text{cm}^{-1}$ .

#### 2-amino-1-(benzyloxy)-5-oxo-4,5-dihydro-1H-pyrrole-3-carbonitrile

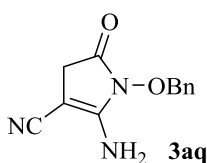

Following the General procedure B, Compound 1 (0.2 mmol, 1.0 eq), malononitrile (0.3 mmol, 1.5 eq.) and  $\text{K}_2\text{CO}_3$  (82.8 mg, 0.6 mmol, 3.0 eq), NaI (0.04 mmol) and THF (2 mL), the crude product was purified by a flash column chromatography (Petroleum/ EtOAc = 3: 1) to obtain **3aq** (38.4 mg) as a white solid in 84% yield. Mp: 110–112 °C.  $^1\text{H}$  NMR (500 MHz, DMSO)  $\delta$  7.53 (d,  $J$  = 3.5 Hz, 2H), 7.41 (m, 5H), 5.02 (s, 2H), 3.18 (s, 2H).  $^{13}\text{C}$  NMR (125 MHz, DMSO)  $\delta$  169.10, 155.52, 134.22, 130.49, 129.59, 128.79, 119.29, 79.05, 43.83, 32.35. HRMS ESI Calcd for  $\text{C}_{12}\text{H}_{12}\text{N}_3\text{O}_2$   $[\text{M}+\text{H}]^+$ : 230.0924, Found: 230.0925. IR (KBr): 3336, 3223, 2187, 1731, 1658, 1597, 1454, 1335, 1208, 1059, 909, 732, 698, 670  $\text{cm}^{-1}$ .

#### 1-(o-methylbenzyloxy)-5-oxo-2-phenyl-4,5-dihydro-1H-pyrrole-3-carbonitrile

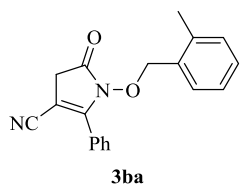

Following the General procedure A, **3ba** (52.3 mg) was isolated as a white solid in 86% yield. Mp: 120–122 °C.  $^1\text{H}$  NMR (500 MHz,  $\text{CDCl}_3$ )  $\delta$  7.50 (t,  $J$  = 7.3 Hz, 1H), 7.47 (d,  $J$  = 7.3 Hz, 2H), 7.42 (t,  $J$  = 7.6 Hz, 2H), 7.20 (t,  $J$  = 7.5 Hz, 1H), 7.07 (t,  $J$  = 7.4 Hz, 1H), 6.96 (dd,  $J$  = 17.2, 7.5 Hz, 2H), 4.93 (s, 2H), 3.37 (s, 2H), 2.05 (s, 3H).  $^{13}\text{C}$  NMR (126 MHz,  $\text{CDCl}_3$ )  $\delta$  169.07, 156.87, 138.76, 131.35, 131.24, 130.71, 130.52, 129.86, 128.62, 128.46, 125.85, 125.57, 115.41, 79.45, 76.42, 35.32, 18.34. HRMS ESI Calcd for  $\text{C}_{19}\text{H}_{16}\text{N}_2\text{NaO}_2$   $[\text{M}+\text{Na}]^+$ : 327.1104, found: 327.1101. IR (KBr): 2952, 2903, 2207, 1735, 1446, 1377, 1355, 1321, 1228, 1186, 1165, 1057, 919, 762, 748, 693  $\text{cm}^{-1}$ .

#### 1-(o-chlorobenzoyloxy)-5-oxo-2-phenyl-4,5-dihydro-1H-pyrrole-3-carbonitrile

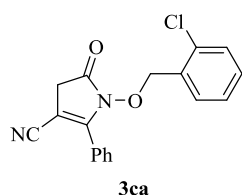

Following the General procedure A, **3ca** (51.5 mg) was isolated as a white solid in 79% yield. Mp: 108–110 °C.  $^1\text{H}$  NMR (500 MHz,  $\text{CDCl}_3$ )  $\delta$  7.48 –

7.43 (m, 1H), 7.41 (t,  $J = 4.2$  Hz, 2H), 7.40–7.34 (m, 2H), 7.22–7.15 (m, 2H), 7.09 (d,  $J = 7.1$  Hz, 1H), 7.07–7.00 (m, 1H), 5.09 (s, 2H), 3.39 (s, 2H).  $^{13}\text{C}$  NMR (125 MHz,  $\text{CDCl}_3$ )  $\delta$  169.11, 156.79, 135.21, 132.34, 131.24, 130.87, 130.69, 129.56, 128.59, 128.44, 126.90, 125.41, 115.49, 79.42, 75.18, 35.37. HRMS ESI Calcd for  $\text{C}_{18}\text{H}_{13}\text{ClN}_2\text{NaO}_2$   $[\text{M}+\text{Na}]^+$ : 347.0558, found: 347.0558. IR (KBr): 3062, 2922, 2208, 1742, 1620, 1596, 1477, 1447, 1321, 1275, 1229, 1187, 1056, 910, 763, 695, 652, 606, 495, 408. $\text{cm}^{-1}$ .

**1-(o-bromobenzoyloxy)- 5-oxo-2-phenyl-4,5-dihydro-1H-pyrrole-3-carbonitrile**

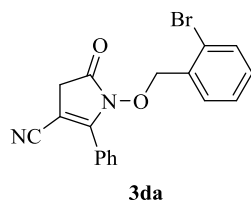

Following the General procedure A, **3da** (64.9 mg) was isolated as a white solid in 88% yield. Mp: 118–120 °C.  $^1\text{H}$  NMR (500 MHz,  $\text{CDCl}_3$ )  $\delta$  7.47–7.40 (m, 3H), 7.37 (t,  $J = 7.4$  Hz, 3H), 7.14–7.04 (m, 3H), 5.08 (s, 2H), 3.39 (s, 2H).  $^{13}\text{C}$  NMR (125 MHz,  $\text{CDCl}_3$ )  $\delta$  169.08, 156.75, 132.83, 132.46, 132.28, 131.19, 130.91, 128.60, 128.44, 127.49, 125.42, 125.21, 115.44, 79.49, 77.48, 35.37. HRMS ESI Calcd for  $\text{C}_{18}\text{H}_{13}\text{BrN}_2\text{NaO}_2$   $[\text{M}+\text{Na}]^+$ : 391.0053, found: 391.0053. IR (KBr): 2956, 2917, 2207, 1735, 1446, 1379, 1354, 1321, 1228, 1186, 1165, 1058, 1030, 755, 734, 693. $\text{cm}^{-1}$ .

**1-(m-fluorobenzoyloxy)- 5-oxo-2-phenyl-4,5-dihydro-1H-pyrrole-3-carbonitrile**

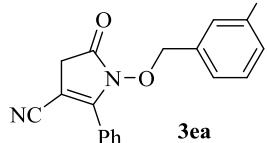

Following the General procedure A, **3ea** (41.9 mg) was isolated as a white solid in 68% yield. Mp: 108–110 °C.  $^1\text{H}$  NMR (500 MHz,  $\text{CDCl}_3$ )  $\delta$  7.55 (dd,  $J = 7.9, 0.7$  Hz, 3H), 7.49 (dd,  $J = 8.0, 7.0$  Hz, 2H), 7.23–7.18 (m, 1H), 7.00 (tdd,  $J = 8.5, 2.6, 0.9$  Hz, 1H), 6.86 (d,  $J = 7.6$  Hz, 1H), 6.71 (ddd,  $J = 9.2, 2.3, 1.8$  Hz, 1H), 4.89 (s, 2H), 3.40 (s, 2H).  $^{13}\text{C}$  NMR (125 MHz,  $\text{CDCl}_3$ )  $\delta$  169.11, 163.48, 161.51, 156.42, 134.84, 134.77, 131.67, 130.11, 130.04, 128.81, 128.57, 125.51, 125.49, 125.46, 116.83, 116.66, 116.56, 116.39, 115.31, 79.75, 77.99, 35.31.  $^{19}\text{F}$  NMR (471 MHz,  $\text{CDCl}_3$ )  $\delta$  -112.26. HRMS ESI Calcd for  $\text{C}_{18}\text{H}_{13}\text{FN}_2\text{NaO}_2$   $[\text{M}+\text{Na}]^+$ : 331.0853, found: 331.0853. IR (KBr): 3060, 2920, 2209, 1741, 1592, 1489, 1448, 1379, 1275, 1260, 1231, 1167, 1143, 1061, 792, 750. $\text{cm}^{-1}$ .

**1-(m-methoxybenzoyloxy)- 5-oxo-2-phenyl-4,5-dihydro-1H-pyrrole-3-carbonitrile**

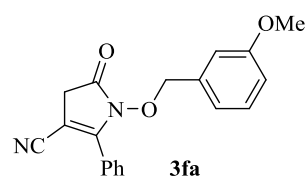

Following the General procedure A, **3fa** (51.8 mg) was isolated as a white solid in 81% yield. Mp: 110–112 °C.  $^1\text{H}$  NMR (500 MHz,  $\text{CDCl}_3$ )  $\delta$  7.58–7.48 (m, 3H), 7.48–7.40 (m, 2H), 7.16–7.09 (m, 1H), 6.83 (ddd,  $J = 8.3, 2.6, 0.7$  Hz, 1H), 6.62 (d,  $J = 7.5$  Hz, 1H), 6.56–6.48 (m, 1H), 4.87 (s, 2H), 3.66 (s, 3H), 3.37 (s, 2H).  $^{13}\text{C}$  NMR (125 MHz,  $\text{CDCl}_3$ )  $\delta$  169.09, 159.52, 156.64, 133.79, 131.39, 129.46, 128.62, 128.57, 125.66, 122.22, 115.42, 115.02, 79.44, 78.65, 55.04, 35.28. HRMS ESI Calcd for  $\text{C}_{19}\text{H}_{16}\text{N}_2\text{NaO}_3$   $[\text{M}+\text{Na}]^+$ : 343.1053, found: 343.1058. IR (KBr): 3055, 2950, 2830, 2207, 1735, 1597, 1491, 1447, 1378, 1355, 1267, 1229, 1187, 1052, 918, 790, 762, 693, 673, 652. $\text{cm}^{-1}$ .

**1-(p-trifluoromethylbenzoyloxy)- 5-oxo-2-phenyl-4,5-dihydro-1H-pyrrole-3-carbonitrile**

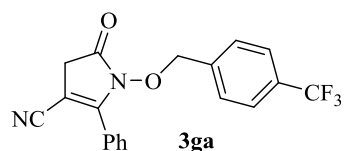

Following the General procedure A, **3ga** (48 mg) was isolated as a white solid in 67% yield. Mp: 106–108 °C.  $^1\text{H}$  NMR (500 MHz,  $\text{CDCl}_3$ )  $\delta$  7.54 (t,  $J = 7.4$  Hz, 1H), 7.50 (d,  $J = 7.4$  Hz, 2H), 7.45

(t,  $J = 7.5$  Hz, 4H), 7.16 (d,  $J = 8.0$  Hz, 2H), 4.94 (s, 2H), 3.41 (s, 2H).  $^{13}\text{C}$  NMR (125 MHz,  $\text{CDCl}_3$ )  $\delta$  169.08, 156.24, 136.34, 131.60, 130.02, 128.80, 128.49, 125.47, 125.42, 125.39, 125.36, 125.34, 124.75, 115.20, 79.90, 77.91, 35.29.  $^{19}\text{F}$  NMR (471 MHz,  $\text{CDCl}_3$ )  $\delta$  -62.88. HRMS ESI Calcd for  $\text{C}_{19}\text{H}_{13}\text{F}_3\text{N}_2\text{NaO}_2$   $[\text{M}+\text{Na}]^+$ : 381.0821, found: 381.0821. IR (KBr): 3007, 2990, 2210, 1738, 1321, 1275, 1260, 1229, 1162, 1112, 1019, 852, 827, 749, 694, 651, 910  $\text{cm}^{-1}$ .

**1-(*p*-methoxybenzyloxy)- 5-oxo-2-phenyl-4,5-dihydro-1H-pyrrole-3-carbonitrile**

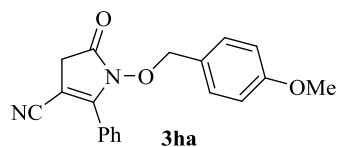

Following the General procedure A, **3ha** (60.2 mg) was isolated as a white solid in 94% yield. Mp: 108–110 °C.  $^1\text{H}$  NMR (500 MHz,  $\text{CDCl}_3$ )  $\delta$  7.52 (t,  $J = 6.2$  Hz, 3H), 7.48–7.42 (m, 2H), 6.93 (d,  $J = 8.5$  Hz, 2H), 6.69 (d,  $J = 8.5$  Hz, 2H), 4.82 (s, 2H), 3.77 (s, 3H), 3.37 (s, 2H).  $^{13}\text{C}$  NMR (125 MHz,  $\text{CDCl}_3$ )  $\delta$  169.13, 160.44, 156.73, 131.69, 131.41, 128.59, 125.72, 124.55, 115.53, 113.82, 79.26, 78.41, 55.21, 35.28. HRMS ESI Calcd for  $\text{C}_{19}\text{H}_{16}\text{N}_2\text{NaO}_3$   $[\text{M}+\text{Na}]^+$ : 343.1053, found: 343.1055. IR (KBr): 3005, 2989, 2208, 1740, 1611, 1514, 1447, 1356, 1275, 1260, 1175, 1030, 826, 759, 697  $\text{cm}^{-1}$ .

**1-(2,4-dichlorobenzyloxy)- 5-oxo-2-phenyl-4,5-dihydro-1H-pyrrole-3-carbonitrile (3ia)**

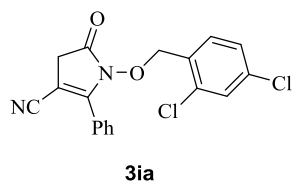

Following the General procedure A, **3ia** (50 mg) was isolated as a white solid in 70% yield. Mp: 108–110 °C.  $^1\text{H}$  NMR (500 MHz,  $\text{CDCl}_3$ )  $\delta$  7.47 (dt,  $J = 8.3, 4.2$  Hz, 1H), 7.40 (d,  $J = 4.4$  Hz, 4H), 7.17 (d,  $J = 0.6$  Hz, 1H), 6.99 (d,  $J = 1.6$  Hz, 2H), 5.04 (s, 2H), 3.39 (s, 2H).  $^{13}\text{C}$  NMR (125 MHz,  $\text{CDCl}_3$ )  $\delta$  169.07, 156.63, 136.35, 135.89, 133.08, 131.40, 129.46, 129.39, 128.62, 128.43, 127.31, 125.42, 115.40, 79.68, 74.56, 35.40. HRMS ESI Calcd for  $\text{C}_{18}\text{H}_{12}\text{Cl}_2\text{N}_2\text{NaO}_2$   $[\text{M}+\text{Na}]^+$ : 381.0168, found: 381.0169. IR (KBr): 3070, 2915, 2208, 1739, 1589, 1475, 1447, 1382, 1256, 1275, 1228, 1186, 1104, 909, 869, 818, 694, 651  $\text{cm}^{-1}$ .

**1-(2-naphthyloxy)- 5-oxo-2-phenyl-4,5-dihydro-1H-pyrrole-3-carbonitrile (3ja)**

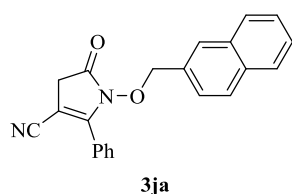

Following the General procedure A, **3ja** (46.9 mg) was isolated as a white solid in 69% yield. Mp: 132–134 °C.  $^1\text{H}$  NMR (500 MHz,  $\text{CDCl}_3$ )  $\delta$  7.81 (d,  $J = 7.9$  Hz, 1H), 7.71 (d,  $J = 7.8$  Hz, 1H), 7.65 (d,  $J = 8.4$  Hz, 1H), 7.53–7.51 (m, 3H), 7.50 (d,  $J = 1.3$  Hz, 1H), 7.46 (dd,  $J = 8.3, 1.3$  Hz, 2H), 7.39 (dd,  $J = 10.8, 4.5$  Hz, 2H), 7.10 (dd,  $J = 8.4, 1.7$  Hz, 1H), 5.08 (s, 2H), 3.41 (s, 2H).  $^{13}\text{C}$  NMR (125 MHz,  $\text{CDCl}_3$ )  $\delta$  169.19, 156.71, 133.52, 132.83, 131.45, 129.95, 129.88, 128.62, 128.58, 128.29, 128.08, 127.63, 126.92, 126.87, 126.41, 125.63, 115.42, 79.45, 79.03, 35.34. HRMS ESI Calcd for  $\text{C}_{22}\text{H}_{16}\text{N}_2\text{NaO}_2$   $[\text{M}+\text{Na}]^+$ : 363.1104, found: 363.1105. IR (KBr): 3056, 2952, 2208, 1802, 1740, 1574, 1509, 1494, 1447, 1356, 1322, 1231, 1167, 1061, 949, 898, 857, 819, 762.  $\text{cm}^{-1}$ .

**1-methoxy- 5-oxo-2-phenyl-4,5-dihydro-1H-pyrrole-3-carbonitrile (3ka)**

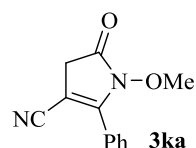

Following the General procedure A, **3ka** (36 mg) was isolated as a white solid in 84% yield. Mp: 45–47 °C.  $^1\text{H}$  NMR (500 MHz,  $\text{CDCl}_3$ )  $\delta$  7.74 (d,  $J = 7.2$  Hz, 2H), 7.62–7.49 (m, 3H), 3.74 (s, 3H), 3.40 (s, 2H).  $^{13}\text{C}$  NMR (125 MHz,  $\text{CDCl}_3$ )  $\delta$  169.26, 155.68, 131.79, 129.00, 128.31, 125.40, 115.39, 80.12, 64.67,

35.35. HRMS ESI Calcd for  $C_{12}H_{10}N_2NaO_2$   $[M+Na]^+$ : 237.0634, found: 237.0634. IR (KBr): 2937, 2209, 1738, 1620, 1447, 1362, 1325, 1232, 1166, 958, 942, 764, 693, 667, 653, 618  $cm^{-1}$ .

**1-ethoxy- 5-oxo-2-phenyl-4, 5-dihydro-1H-pyrrole-3-carbonitrile (3la)**

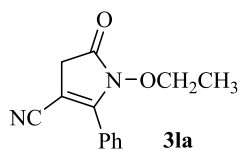

Following the General procedure A, **3la** (37 mg) was isolated as a white solid in 81% yield; white solid, Mp: 81–83 °C.  $^1H$  NMR (500 MHz,  $CDCl_3$ )  $\delta$  7.84–7.66 (m, 2H), 7.60–7.48 (m, 3H), 3.94 (q,  $J$  = 7.1 Hz, 2H), 3.40 (s, 2H), 1.13 (t,  $J$  = 7.1 Hz, 3H).  $^{13}C$  NMR (125 MHz,  $CDCl_3$ )  $\delta$  169.29, 156.11, 131.73, 128.91, 128.41, 125.62, 115.51, 79.86, 73.31, 35.34, 13.08. IR:  $\nu$  3005, 2989, 2207, 1738, 1447, 1357, 1324, 1275, 1261, 1232, 1166, 1065, 1015, 749, 697. HRMS Calcd. For  $C_{13}H_{12}N_2NaO_2$   $[M+Na]^+$ : 251.0791, found: 251.0791.

**1-tert-butyloxy- 5-oxo-2-phenyl-4, 5-dihydro-1H-pyrrole-3-carbonitrile (3ma)**

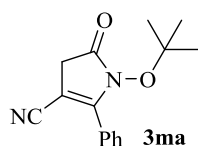

Following the General procedure A, **3ma** (37.9 mg) was isolated as a colorless oil in 74% yield.  $^1H$  NMR (500 MHz,  $CDCl_3$ )  $\delta$  7.71–7.62 (m, 2H), 7.52 (t,  $J$  = 7.6 Hz, 3H), 3.41 (s, 2H), 1.06 (s, 9H).  $^{13}C$  NMR (125 MHz,  $CDCl_3$ )  $\delta$  171.28, 158.54, 131.23, 128.98, 128.64, 127.20, 115.58, 87.82, 80.52, 35.17, 27.14. HRMS ESI Calcd for  $C_{15}H_{16}N_2NaO_2$   $[M+Na]^+$ : 279.1104, found: 279.1104. IR (KBr): 2937, 2209, 1738, 1620, 1447, 1362, 1325, 1232, 1166, 958, 942, 764, 693, 667, 653, 618  $cm^{-1}$ .

**1-allyloxy- 5-oxo-2-phenyl-4, 5-dihydro-1H-pyrrole-3-carbonitrile (3na)**

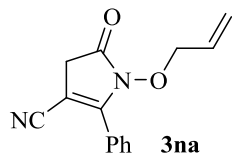

Following the General procedure A, **3na** (34.6 mg) was isolated as a colorless oil in 72% yield.  $^1H$  NMR (500 MHz,  $CDCl_3$ )  $\delta$  7.65 (d,  $J$  = 7.0 Hz, 2H), 7.52–7.44 (m, 3H), 5.58 (ddt,  $J$  = 17.0, 10.3, 6.8 Hz, 1H), 5.16 (t,  $J$  = 14.2 Hz, 2H), 4.29 (d,  $J$  = 6.8 Hz, 2H), 3.32 (s, 2H).  $^{13}C$  NMR (125 MHz,  $CDCl_3$ )  $\delta$  169.26, 155.68, 131.79, 129.00, 128.31, 125.40, 115.39, 80.12, 64.67, 35.35. HRMS ESI Calcd for  $C_{14}H_{12}N_2NaO_2$   $[M+Na]^+$ : 263.0791, found: 263.0792. IR (KBr): 2208, 1737, 1447, 1356, 1275, 1260, 1231, 1167, 1061, 942, 749, 696, 652.  $cm^{-1}$ .

**1-(benzhydryloxy)- 5-oxo-2-phenyl-4, 5-dihydro-1H-pyrrole-3-carbonitrile (3oa)**

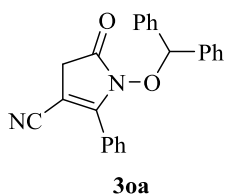

Following the General procedure A, **3oa** (44.7 mg) was isolated as a white solid in 63% yield. Mp: 141–143 °C.  $^1H$  NMR (500 MHz,  $CDCl_3$ )  $\delta$  7.51 (t,  $J$  = 7.2 Hz, 1H), 7.43 (t,  $J$  = 7.6 Hz, 2H), 7.39 (d,  $J$  = 7.6 Hz, 2H), 7.28 (t,  $J$  = 3.6 Hz, 2H), 7.20 (t,  $J$  = 7.6 Hz, 4H), 7.10 (d,  $J$  = 7.6 Hz, 4H), 6.33 (s, 1H), 3.31 (s, 2H).  $^{13}C$  NMR (125 MHz,  $CDCl_3$ ) 168.88, 157.26, 136.66, 131.19, 128.76, 128.51, 128.29, 128.22, 128.18, 126.08, 115.47, 88.42, 79.11, 35.22. HRMS ESI Calcd for  $C_{24}H_{18}N_2NaO_2$   $[M+Na]^+$ : 389.1260, found: 389.1262. IR (KBr): 3005, 2989, 2208, 1735, 1495, 1448, 1365, 1334, 1285, 1260, 1232, 1167, 912, 749, 696, 605  $cm^{-1}$ .

**1-cyclohexyloxy- 5-oxo-2-phenyl-4, 5-dihydro-1H-pyrrole-3-carbonitrile (3pa)**

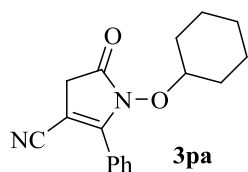

Following the General procedure A, **3pa** (47.9 mg) was isolated as a white solid in 85% yield.

Mp: 92–94 °C.  $^1H$  NMR (500 MHz,  $CDCl_3$ )  $\delta$  7.74 (d,  $J$  = 7.2 Hz, 2H),

7.62–7.49 (m, 3H), 3.74 (s, 3H), 3.40 (s, 2H).  $^{13}\text{C}$  NMR (125 MHz,  $\text{CDCl}_3$ )  $\delta$  169.26, 155.68, 131.79, 129.00, 128.31, 125.40, 115.39, 80.12, 64.67, 35.35. HRMS ESI Calcd for  $\text{C}_{12}\text{H}_{10}\text{N}_2\text{NaO}_2$   $[\text{M}+\text{Na}]^+$ : 237.0634, found: 237.0634. IR (KBr): 2937, 2209, 1738, 1620, 1447, 1362, 1325, 1232, 1166, 958, 942, 764, 693, 667, 653,  $618\text{ cm}^{-1}$ .

#### 1-(cyclododecyloxy)- 5-oxo-2-phenyl-4, 5-dihydro-1H-pyrrole-3-carbonitrile (3qa)

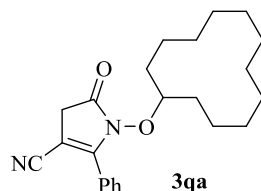

Following the General procedure A, **3qa** (53.4 mg) was isolated as a white solid in 73% yield. Mp: 88–90 °C.  $^1\text{H}$  NMR (500 MHz,  $\text{CDCl}_3$ )  $\delta$  7.62 (d,  $J = 7.5$  Hz, 2H), 7.46 (dt,  $J = 14.4, 7.1$  Hz, 3H), 3.95 (t,  $J = 4.5$  Hz, 1H), 3.33 (s, 2H), 1.37 (dt,  $J = 13.6, 6.9$  Hz, 2H), 1.31 (dd,  $J = 11.5, 6.4$  Hz, 2H), 1.21–1.08 (m, 15H), 1.00 (d,  $J = 6.0$  Hz, 2H).  $^{13}\text{C}$  NMR (125 MHz,  $\text{CDCl}_3$ )  $\delta$  169.45, 157.21, 131.45, 128.77, 128.65, 126.11, 115.50, 85.50, 79.87, 35.29, 27.90, 24.05, 23.39, 23.25, 23.06, 20.74. HRMS ESI Calcd for  $\text{C}_{23}\text{H}_{30}\text{N}_2\text{NaO}_2$   $[\text{M}+\text{Na}]^+$ : 389.2199, found: 389.2199. IR (KBr): 3005, 2989, 2932, 2861, 2209, 1742, 1470, 1361, 1275, 1260, 1231, 1165, 896, 749,  $418\text{ cm}^{-1}$ .

#### 1-dodecyloxy- 5-oxo-2-phenyl-4, 5-dihydro-1H-pyrrole-3-carbonitrile (3ra)

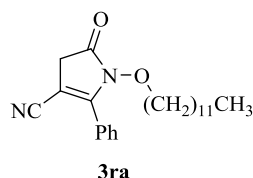

Following the General procedure A, **3ra** (57.4 mg) was isolated as a white solid in 78% yield. Mp: 68–70 °C.  $^1\text{H}$  NMR (500 MHz,  $\text{CDCl}_3$ )  $\delta$  7.76–7.68 (m, 2H), 7.59–7.47 (m, 3H), 3.85 (t,  $J = 6.5$  Hz, 2H), 3.38 (s, 2H), 1.53–1.44 (m, 2H), 1.33–1.05 (m, 19H), 0.88 (t,  $J = 7.0$  Hz, 3H).  $^{13}\text{C}$  NMR (125 MHz,  $\text{CDCl}_3$ )  $\delta$  169.19, 156.23, 131.69, 128.86, 128.49, 125.57, 115.50, 79.83, 77.58, 35.36, 31.85, 29.55, 29.42, 29.29, 29.28, 29.02, 27.64, 25.41, 22.63, 14.07. HRMS ESI Calcd for  $\text{C}_{23}\text{H}_{32}\text{N}_2\text{NaO}_2$   $[\text{M}+\text{Na}]^+$ : 391.2356, found: 391.2357. IR (KBr): 2922, 2852, 2209, 1743, 1466, 1447, 1360, 1324, 1275, 1260, 1231, 1185, 1165, 1064, 763,  $750\text{ cm}^{-1}$ .

#### 1-(3,7-dimethyloct-8-en-1-yl)oxy-5-oxo-2-phenyl-4,5-dihydro-1H-pyrrole-3-carbonitrile (3sa)

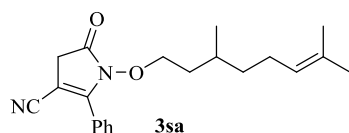

Following the General procedure A, **3sa** (50.7mg) was isolated as a colorless oil in 75% yield.  $^1\text{H}$  NMR (500 MHz,  $\text{CDCl}_3$ )  $\delta$  7.73 (d,  $J = 7.5$  Hz, 2H), 7.54 (dt,  $J = 14.5, 7.0$  Hz, 3H), 5.00 (t,  $J = 6.9$  Hz, 1H), 3.98–3.82 (m, 2H), 3.39 (s, 2H), 1.93–1.76 (m, 2H), 1.67 (s, 3H), 1.62–1.49 (m, 4H), 1.41 (dt,  $J = 13.1, 6.6$  Hz, 1H), 1.30 (dt,  $J = 14.0, 6.9$  Hz, 1H), 1.17 (ddd,  $J = 15.4, 12.7, 5.9$  Hz, 1H), 1.04 (dt,  $J = 14.1, 7.0$  Hz, 1H), 0.70 (d,  $J = 6.6$  Hz, 3H).  $^{13}\text{C}$  NMR (125 MHz,  $\text{CDCl}_3$ )  $\delta$  169.16, 156.18, 131.69, 131.28, 128.86, 128.43, 125.56, 124.31, 115.46, 79.84, 75.95, 36.77, 35.34, 34.51, 28.94, 25.62, 25.17, 19.00, 17.56. HRMS ESI Calcd for  $\text{C}_{21}\text{H}_{26}\text{N}_2\text{NaO}_2$   $[\text{M}+\text{Na}]^+$ : 361.1886, found: 361.1886. IR (KBr): 3005, 2963, 2915, 2208, 1740, 1447, 1379, 1359, 1275, 1260, 1229, 1164, 1063, 943, 749, 694,  $652\text{ cm}^{-1}$ .

### Gram-scale reaction and further transformations

**Gram-scale reaction:** To a round-bottom flask were added compound **1a** (15 mmol, 1.5 eq.), **2a** (10 mmol, 1.0 eq.), MeONa (160 mg, 3.0 mmol, 3.0 eq.), NaI (30 mg, 0.2 mmol) and THF (10.0 mL) under  $\text{N}_2$ , the mixture was stirred for 24h at room temperature. The reactant was filtered through celite plate, and the solvent was removed under reduced pressure, subsequently a solution

of *p*-TsOH (100 mg, 0.5 mmol) in CHCl<sub>3</sub> (10 mL) was added and stirred at 40°C for 1h. After removing the solvent, the residue was purified by a flash column chromatography (Petroleum ether/ EtOAc = 5:1, V/V) to afford the product **3aa**(2.65g, 91%yield).

#### 1-benzyloxy-2-phenyl-5-(triisopropylsilyloxy)-1H-pyrrole-3-carbonitrile (**4**)

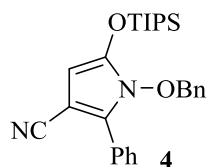

To a solution of **3aa**(0.1g, 0.345mmol) in dichloromethane(5mL) was added TIPSOTf (0.158g, 0.51mmol) by syringe slowly under nitrogen. The mixture was stirred for 2h. A saturated solution of brine was added, extracted with CH<sub>2</sub>Cl<sub>2</sub> (5mL×3). The combined organic phase was dried over Na<sub>2</sub>SO<sub>4</sub>, concentrated and finally silica gel flash column chromatographed to give product **4** (132 mg, 86% yield) as a white solid. <sup>1</sup>H NMR (500 MHz, CDCl<sub>3</sub>) δ 7.62–7.58 (m, 2H), 7.39 (t, *J* = 7.4 Hz, 2H), 7.36–7.31 (m, 1H), 7.29 (dd, *J* = 8.3, 6.5 Hz, 1H), 7.21 (t, *J* = 7.6 Hz, 2H), 7.03 (d, *J* = 7.6 Hz, 2H), 5.55 (s, 1H), 4.85 (s, 2H), 1.35 (dt, *J* = 15.0, 7.5 Hz, 3H), 1.15 (d, *J* = 7.5 Hz, 18H). <sup>13</sup>C NMR (125 MHz, CDCl<sub>3</sub>) δ 139.30, 132.59, 129.89, 129.31, 129.26, 128.45, 128.36, 128.16, 127.91, 117.51, 88.91, 83.57, 80.58, 17.64, 12.18. HRMS ESI Calcd for C<sub>27</sub>H<sub>35</sub>N<sub>2</sub>O<sub>2</sub>Si [M+H]<sup>+</sup>: 447.2462, Found: 447.2464. IR (KBr): 2945, 2866, 2218, 1582, 1574, 1530, 1485, 1462, 1362, 1173, 996, 908, 845, 779, 737 cm<sup>-1</sup>.

#### 1-benzyloxy-4-cyano-5-phenyl-1H-pyrrol-2-yl trifluoromethanesulfonate

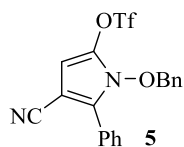

At 0°C, to a solution of **3aa**(58mg, 0.2mmol) and DIPEA(51.6mg, 0.4mmol) in dichloromethane(5mL) was added (CF<sub>3</sub>SO<sub>2</sub>)<sub>2</sub>O (84.6mg, 0.3mmol) by syringe slowly under nitrogen. The mixture was stirred at rt for 2h. A saturated solution of brine was added, extracted with CH<sub>2</sub>Cl<sub>2</sub>(5mL×3), dried over Na<sub>2</sub>SO<sub>4</sub>, concentrated and finally silica gel flash column chromatographed to give product **5** (61mg, 72%yield) as a light yellow oil. <sup>1</sup>H NMR (500 MHz, CDCl<sub>3</sub>) δ 7.73–7.63 (m, 1H), 7.53–7.45 (m, 3H), 7.35 (dd, *J* = 10.9, 4.0 Hz, 1H), 7.26 (t, *J* = 7.4 Hz, 2H), 7.06 (d, *J* = 7.8 Hz, 2H), 6.24 (d, *J* = 1.1 Hz, 1H), 4.84 (s, 2H). <sup>13</sup>C NMR (125 MHz, CDCl<sub>3</sub>) δ 133.40, 131.18, 130.30, 130.05, 129.90, 129.53, 128.99, 128.67, 128.47, 126.08, 122.41, 119.85, 117.29, 115.20, 114.73, 98.00, 85.76, 82.13. <sup>19</sup>F NMR (471 MHz, CDCl<sub>3</sub>) δ -72.21. HRMS ESI Calcd for C<sub>19</sub>H<sub>14</sub>F<sub>3</sub>N<sub>2</sub>O<sub>4</sub>S [M+H]<sup>+</sup>: 423.0621, Found: 423.0622. IR (KBr): 2959, 2227, 1569, 1524, 1434, 1371, 1246, 1216, 1131, 1115, 904, 869, 842, 792, 764 cm<sup>-1</sup>.

#### 4-benzylidene-1-benzyloxy-5-oxo-2-phenyl-4,5-dihydro-1H-pyrrole-3-carbonitrile

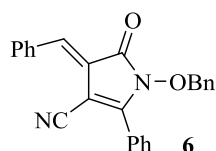

**3aa**(0.145g, 0.5mmol.) and piperidine (4.25mg, 0.05mmol) were added to a solution of benzaldehyde (63.6mg,0.6mmol) in ethanol (5 mL), and the mixture was stirred at reflux for 10 h. The mixture was concentrated under vacue, and the residue was poured into H<sub>2</sub>O (10 mL), then extracted with CH<sub>2</sub>Cl<sub>2</sub> (10mL×3), and the combined organic layers were washed with brine, dried over Na<sub>2</sub>SO<sub>4</sub> and concentrated. The residue was purified by flash chromatography on silica gel (Ethyl acetate/Petroleum ether= 1:4) to obtain the product (161mg, 85%yield) as a yellow solid. Mp: 124-126 °C. <sup>1</sup>H NMR (500 MHz, CDCl<sub>3</sub>) δ 8.35 (d, *J* = 3.6 Hz, 2H), 7.67 (d, *J* = 7.4 Hz, 2H), 7.59–7.43 (m, 6H), 7.37 (s, 2H), 7.29 (t, *J* = 7.3 Hz, 2H), 7.20 (t, *J* = 7.4 Hz, 2H), 7.10 (d, *J* = 7.3 Hz, 2H), 4.97 (s, 2H). <sup>13</sup>C NMR (125 MHz, CDCl<sub>3</sub>) δ 160.60, 150.30, 142.85, 133.19, 132.67, 132.45, 132.08, 131.47, 130.12, 129.36, 128.85, 128.74, 128.67, 128.47, 125.76, 123.60, 114.23,

84.04, 78.90. HRMS ESI Calcd for  $C_{25}H_{19}N_2O_2$   $[M+H]^+$ : 379.1441, Found: 379.1442. IR (KBr): 3065, 3027, 2211, 1712, 1614, 1594, 1571, 1491, 1447, 1389, 1155, 1067, 1037, 999  $cm^{-1}$ .

**Ethyl 3-amino-7-(benzyloxy)-2,5-dicyano-4-(2-ethoxy-2-oxoethyl)-6-phenyl-4,7-Dihydro-pyrano[2,3-b]pyrrole-4-carboxylate**

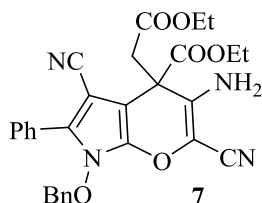

A solution of **3aa** (87mg, 0.3mmol), diethyl but-2-ynedioate (51mg, 0.3mmol) and malononitrile (19.8mg, 0.3mmol) in ethanol(5mL) was stirred at 50°C for 1h. After removing the solvent,  $H_2O$ (10mL) was added, and extracted with EtOAc (5mL×3). The combined organic layers were washed with brine, dried over  $Na_2SO_4$  and concentrated.

The residue was purified by flash chromatography on silica gel (Ethyl acetate/Petroleum ether= 1:1) to obtain the product (112mg, 71%yield) as a yellow solid. Mp: 154-156 °C.  $^1H$  NMR (500 MHz,  $CDCl_3$ )  $\delta$  7.61–7.54 (m, 2H), 7.46–7.39 (m, 3H), 7.32 (d,  $J$  = 7.5 Hz, 1H), 7.23 (t,  $J$  = 7.6 Hz, 2H), 7.09–6.99 (m, 2H), 5.04 (s, 2H), 4.84 (d,  $J$  = 0.9 Hz, 2H), 4.36–4.26 (m, 2H), 4.10 (q,  $J$  = 7.1 Hz, 2H), 3.30 (dd,  $J$  = 40.3, 16.2 Hz, 2H), 1.37 (t,  $J$  = 7.1 Hz, 3H), 1.20 (t,  $J$  = 7.1 Hz, 3H).  $^{13}C$  NMR (125 MHz,  $CDCl_3$ )  $\delta$  170.33, 169.13, 159.49, 133.90, 132.30, 131.82, 130.17, 129.81, 129.21, 128.70, 128.49, 128.39, 126.33, 117.62, 115.04, 94.91, 82.95, 81.81, 62.72, 61.31, 60.51, 44.89, 39.87, 14.03, 13.99. HRMS ESI Calcd. For  $C_{29}H_{26}N_4NaO_6$   $[M+Na]^+$ : 549.1745, found: 549.1746. IR (KBr): 3326, 2220, 2196, 1730, 1651, 1581, 1492, 1475, 1445, 1395, 1220, 1177, 1111, 1023, 914, 858, 749, 732, 694  $cm^{-1}$ .

**Ethyl 1-(benzyloxy)-5-chloro-4-formyl-2-methyl-1H-pyrrole-3-carboxylate**

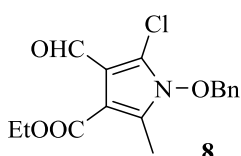

To pyrrolinone **3an** (55mg, 0.20 mmol) and DMF ((29.2 mg, 0.4mmol) was added  $POCl_3$  (0.2 mL, 2.2mmol)) in a dropwise manner. The mixture was heated overnight at 100 °C and then poured on ice (8 mL). After 2 h stirring the suspension was extracted with ethyl acetate (5 mL×3). The organic phase was washed with brine and finally dried with sodium sulfate. The

solvents were evaporated in vacuo and the residue was purified by flash chromatography on silica gel ( $CH_2Cl_2$ ) to furnish the product **8** (44 mg, 68% yield) as brownish powder. Mp: 66-68 °C.  $^1H$  NMR (500 MHz,  $CDCl_3$ )  $\delta$  10.40 (s, 1H), 7.49–7.39 (m, 5H), 5.15 (s, 2H), 4.33 (q,  $J$  = 7.1 Hz, 2H), 2.36 (s, 3H), 1.36 (t,  $J$  = 7.1 Hz, 3H).  $^{13}C$  NMR (125 MHz,  $CDCl_3$ )  $\delta$  186.95, 163.66, 133.79, 132.26, 130.04, 129.99, 128.96, 117.94, 115.60, 108.23, 81.59, 60.54, 14.34, 10.32. HRMS ESI Calcd for  $C_{16}H_{16}ClNNaO_4$   $[M+Na]^+$ : 344.0660, Found: 344.0659. IR (KBr): 2981, 2923, 1701, 1674, 1550, 1488, 1455, 1434, 1382, 1353, 1338, 1274, 1123, 1044, 1025  $cm^{-1}$ .

**Ethyl 2-methyl-5-oxo-4,5-dihydro-1H-pyrrole-3-carboxylate**

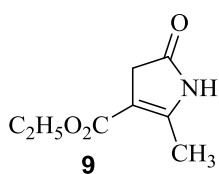

Under  $N_2$  atmosphere Compound **3an** (55mg, 0.2 mmol) was dissolved in THF (3 mL) and then  $SmI_2$  (0.1M, 6mL) was added dropwise by syringe. The reaction mixture was stirred for 12h at room temperature. After filtration through a plug of Celite, the filtrate was concentrated under reduced pressure and purified by flash chromatography on silica gel

(Petroleum/EtOAc, 1:1, V/V) to afford the product **9** as a pale white powder (29.5 mg, 88% yield).

Mp: 80-82 °C.  $^1\text{H}$  NMR (500 MHz,  $\text{CDCl}_3$ )  $\delta$  8.63 (s, 1H), 4.20 (q,  $J = 7.1$  Hz, 1H), 3.30 (d,  $J = 2.3$  Hz, 1H), 2.36 (t,  $J = 2.3$  Hz, 1H), 1.30 (t,  $J = 7.1$  Hz, 1H).  $^{13}\text{C}$  NMR (125 MHz,  $\text{CDCl}_3$ )  $\delta$  178.17, 164.12, 151.49, 104.47, 59.85, 37.50, 14.40, 13.43. HRMS ESI Calcd for  $\text{C}_8\text{H}_{12}\text{NO}_3$   $[\text{M}+\text{H}]^+$ : 170.0812, Found: 170.0812. IR:  $\nu$  3171, 2987, 2921, 1711, 1690, 1639, 1452, 1372, 1313, 1201, 1121, 1073, 997, 755, 715  $\text{cm}^{-1}$ .

#### 4. $^1\text{H}$ NMR, $^{13}\text{C}$ NMR and $^{19}\text{F}$ NMR Spectrum for the Products

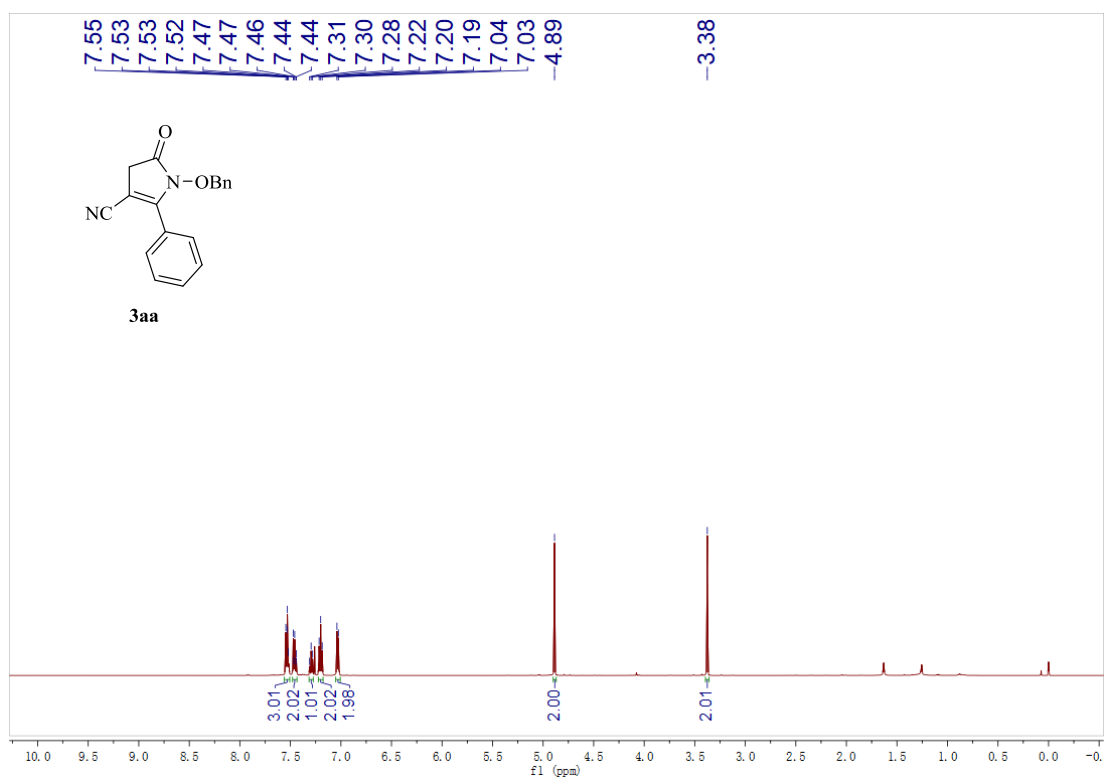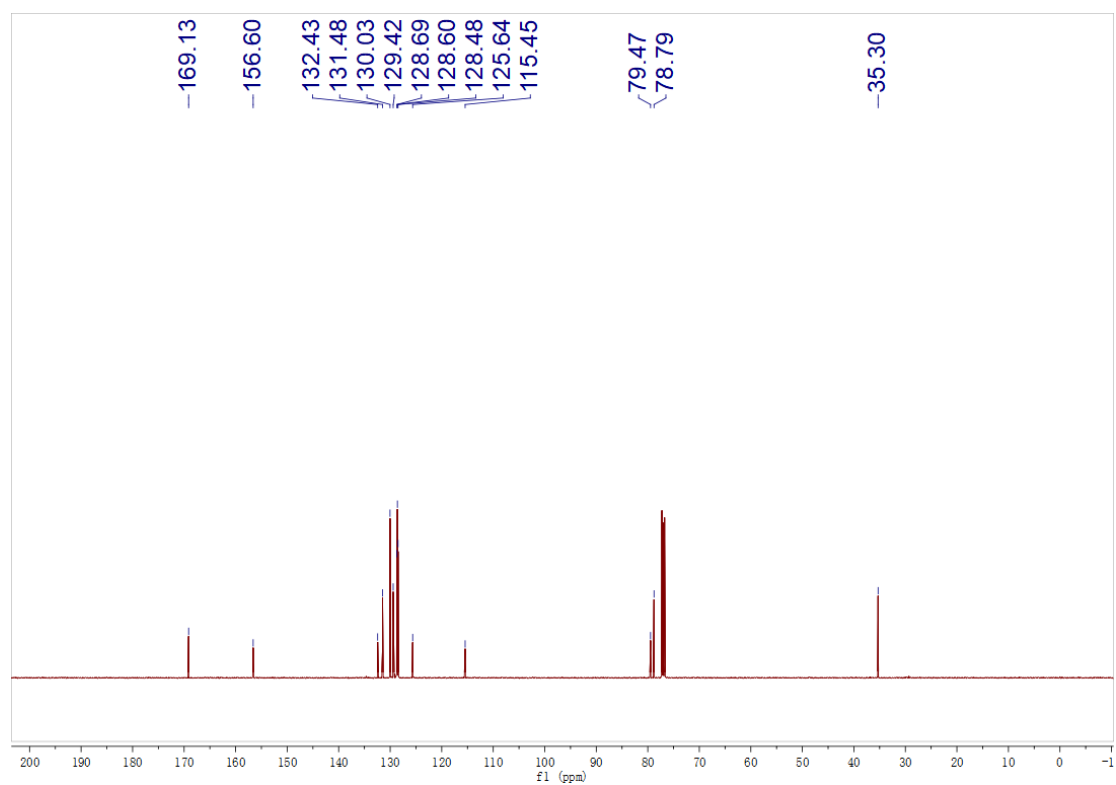

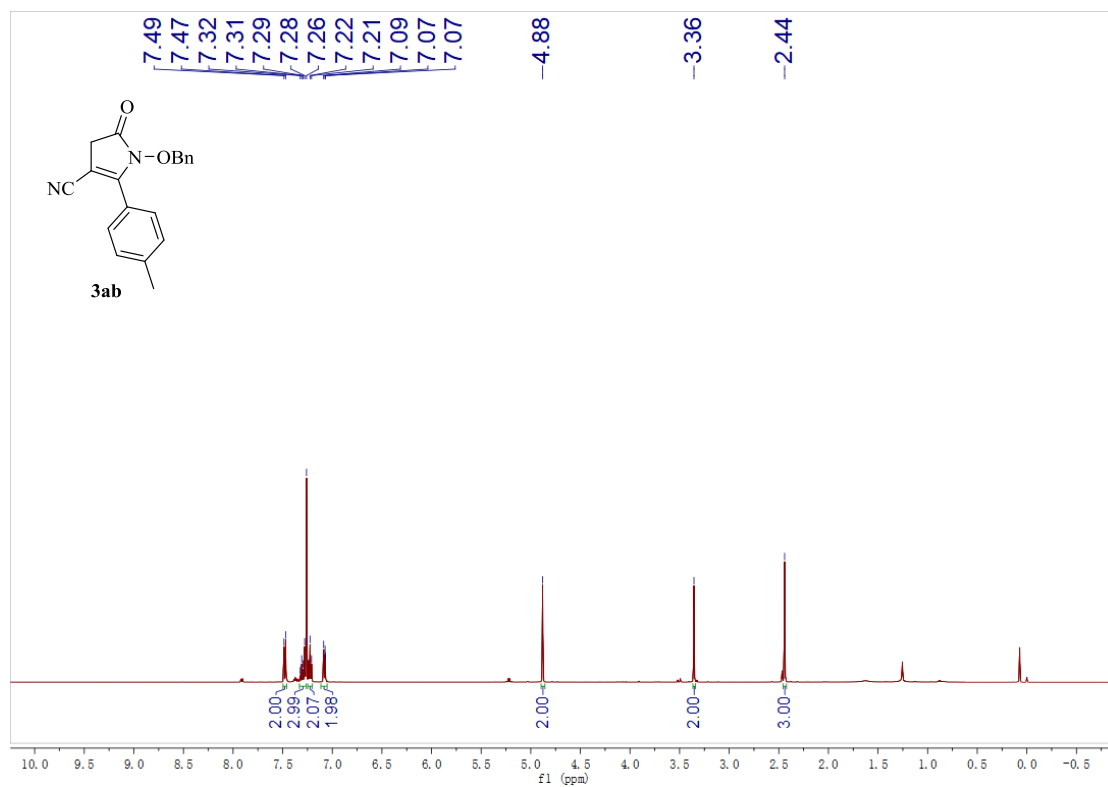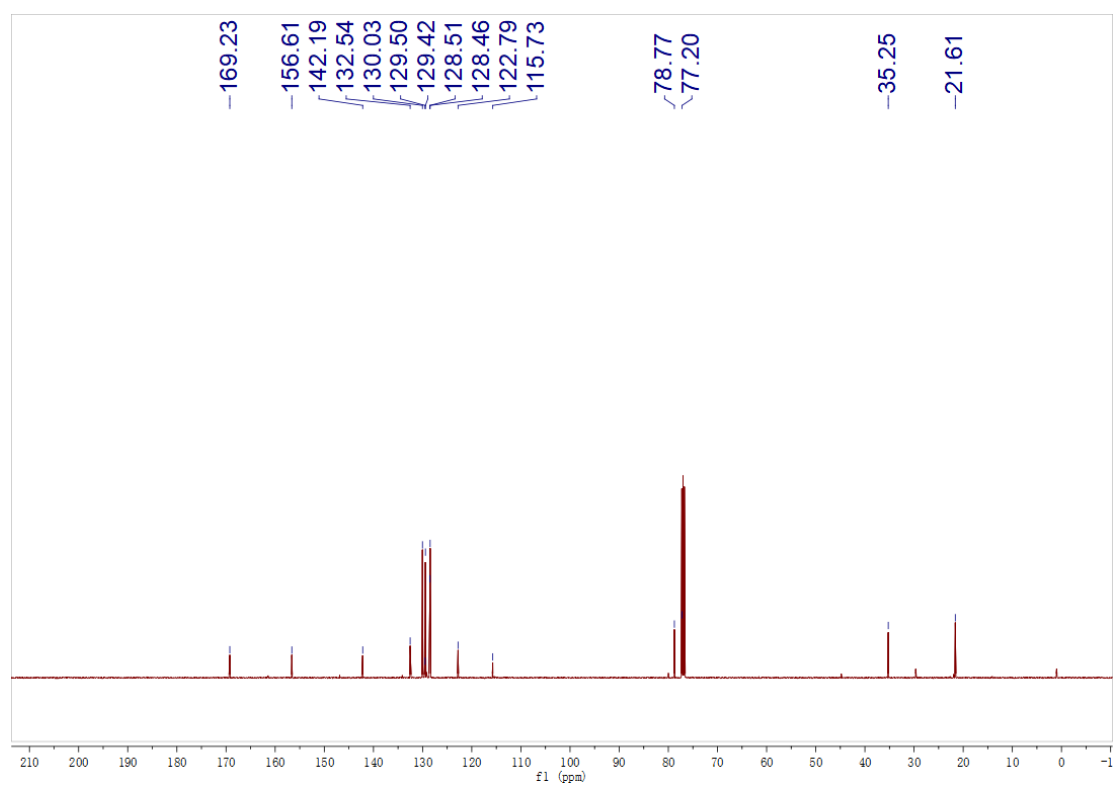

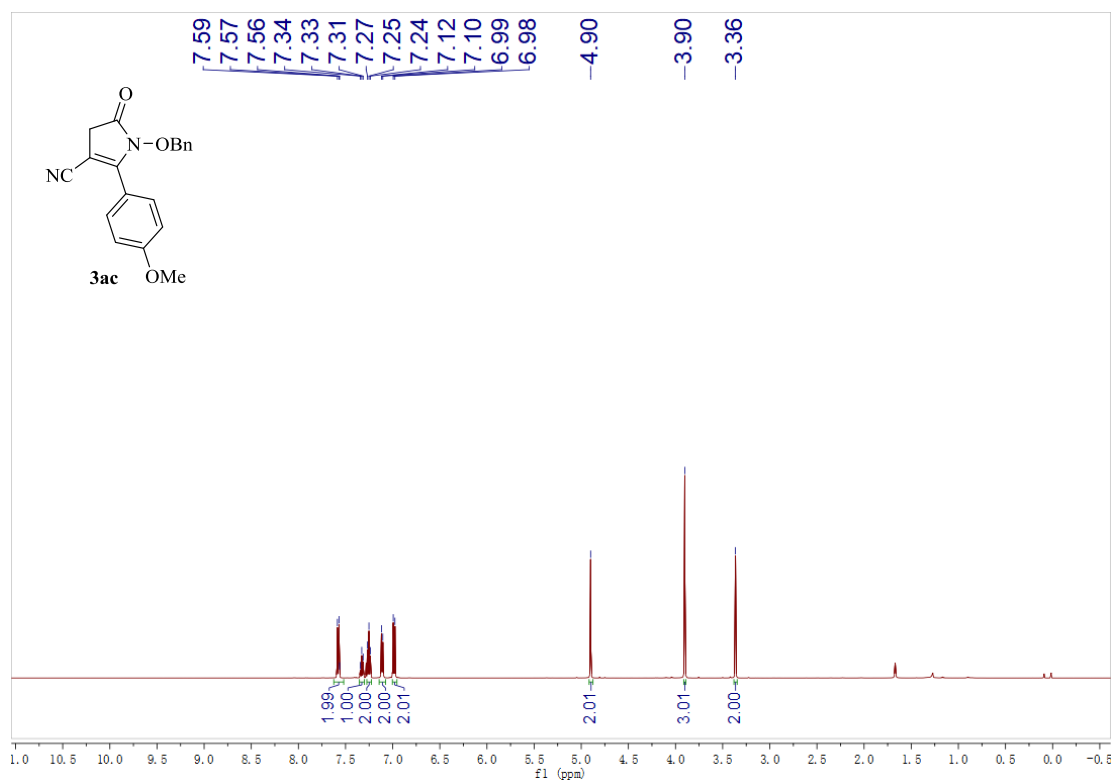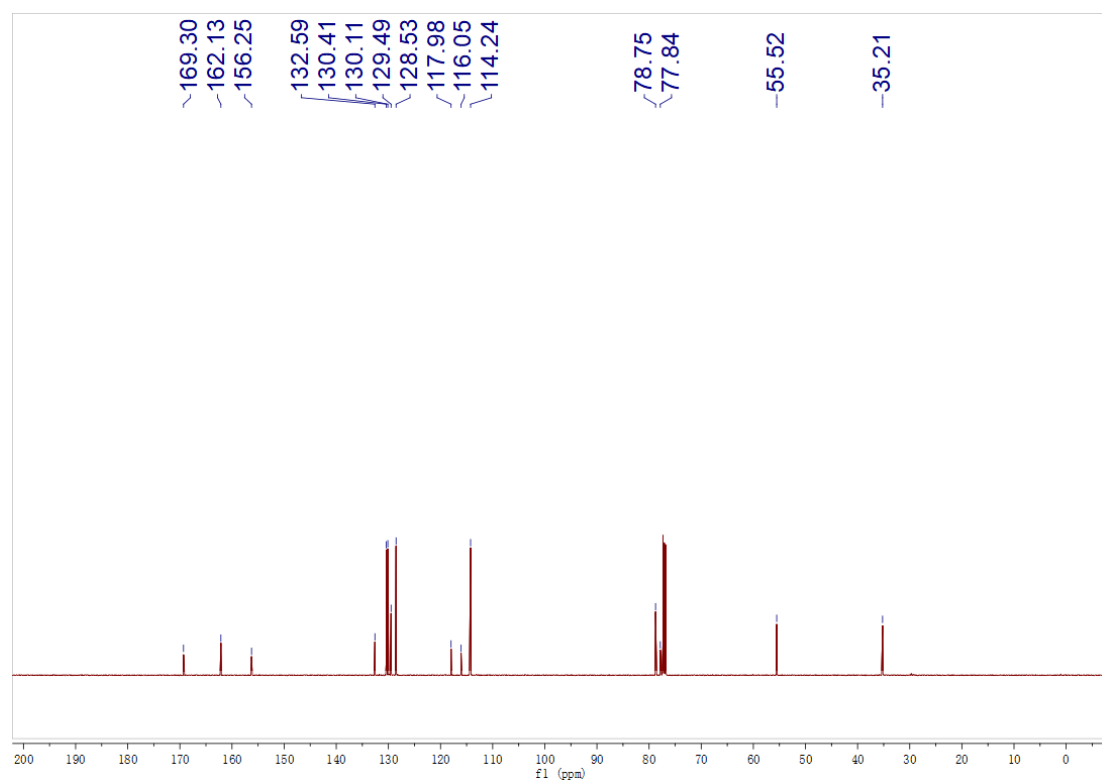

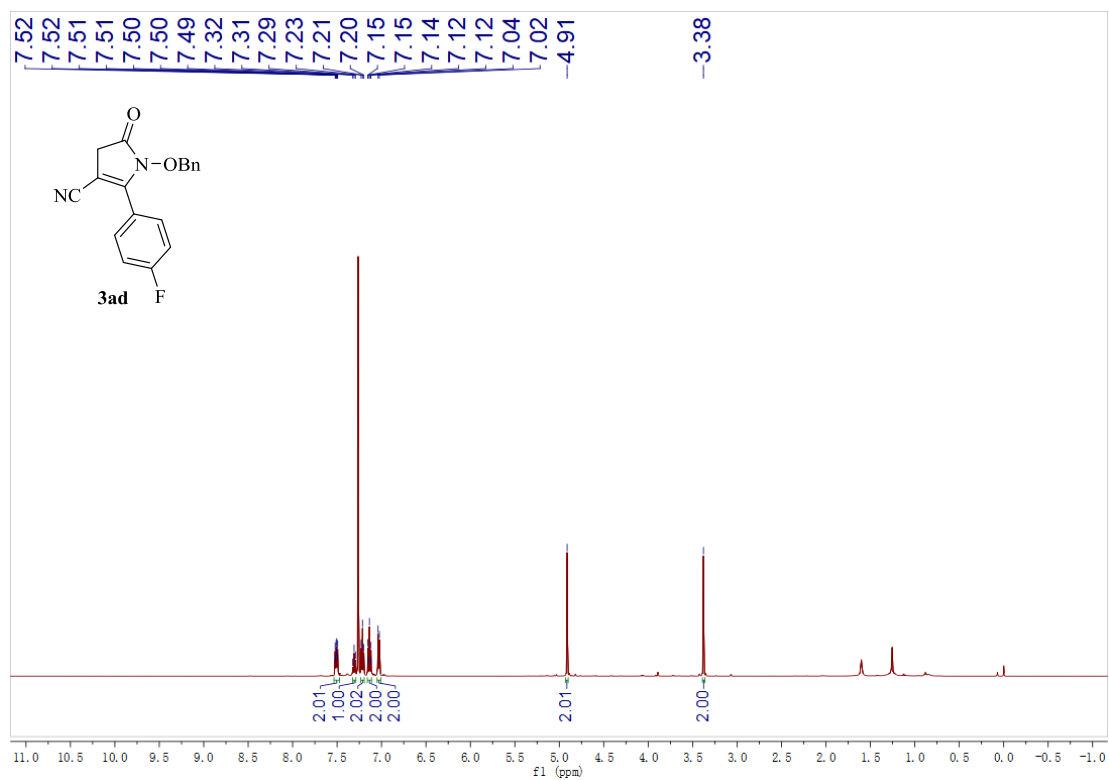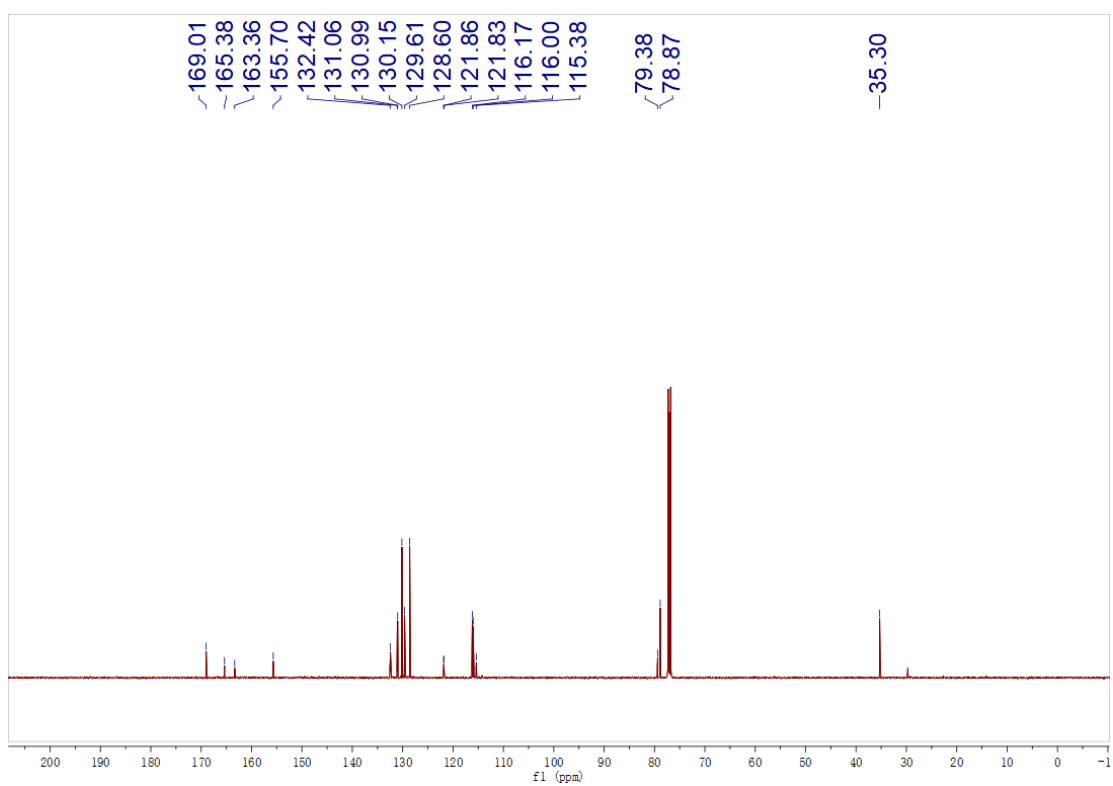

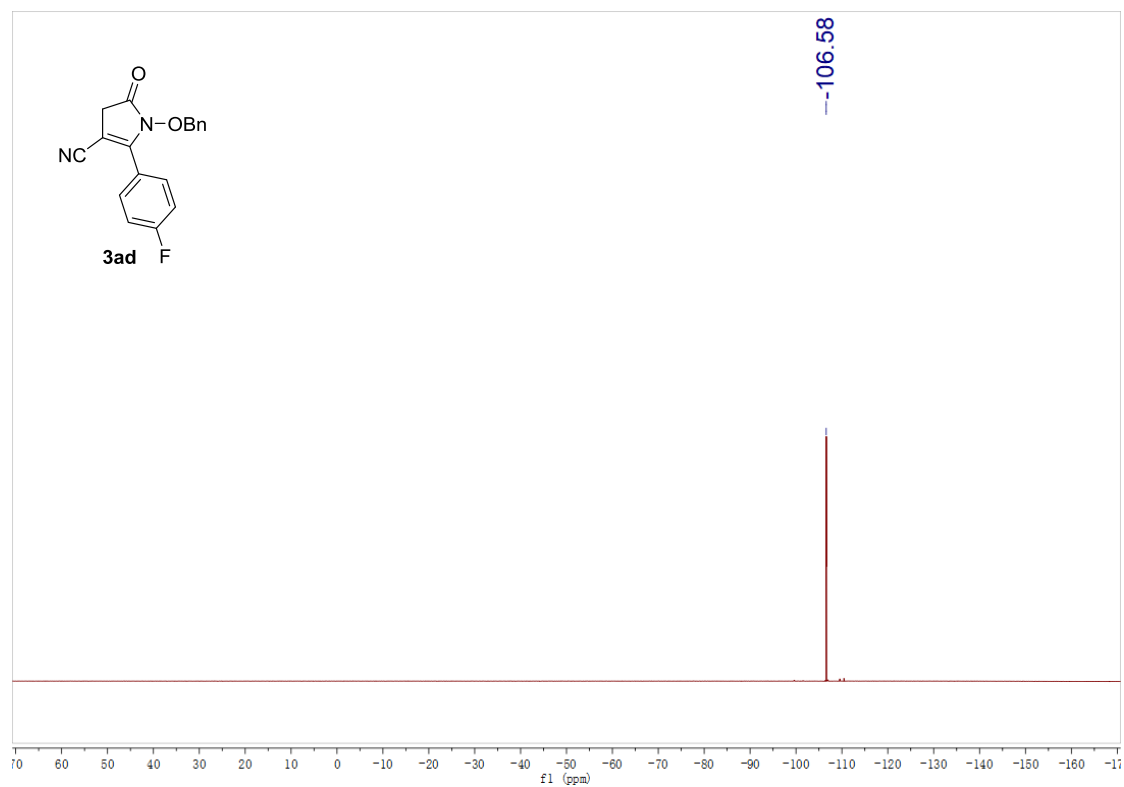

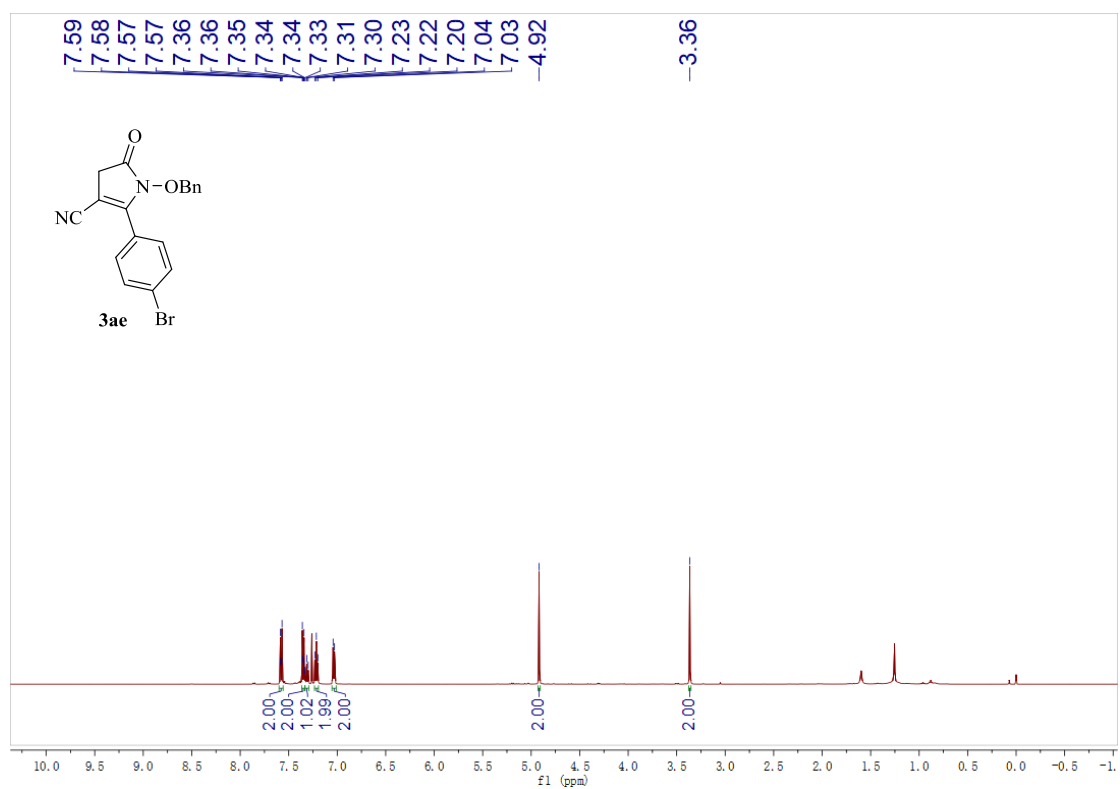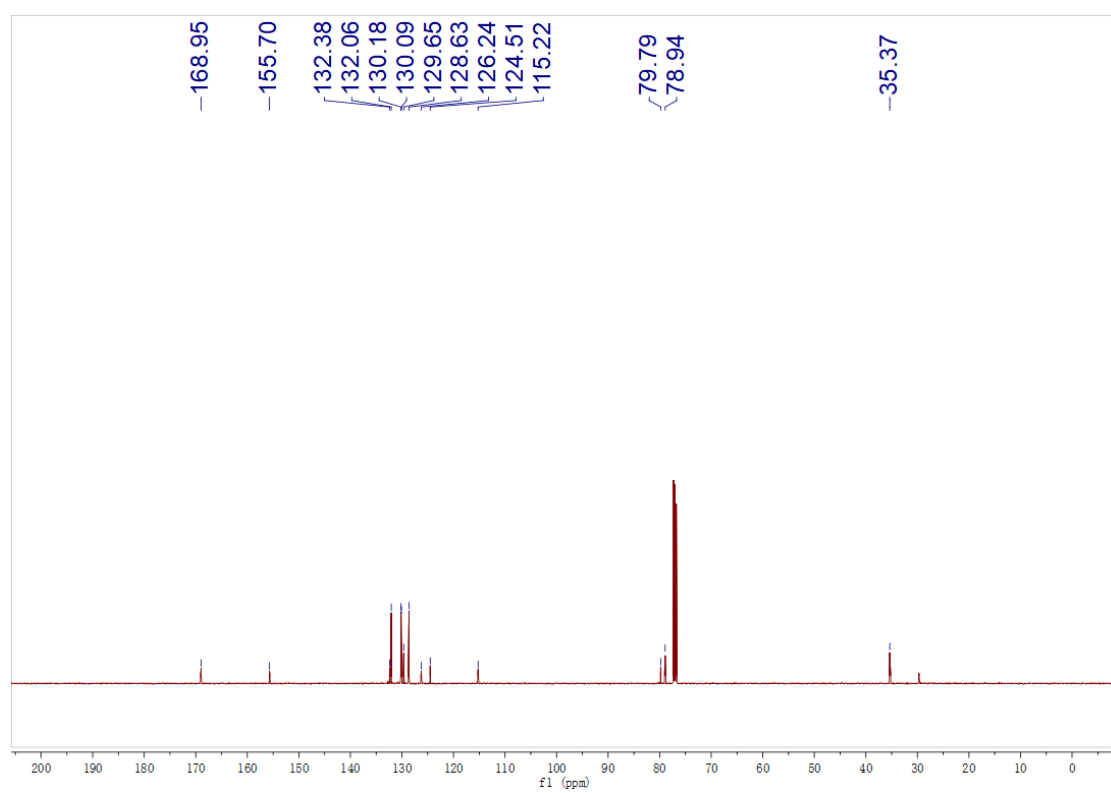

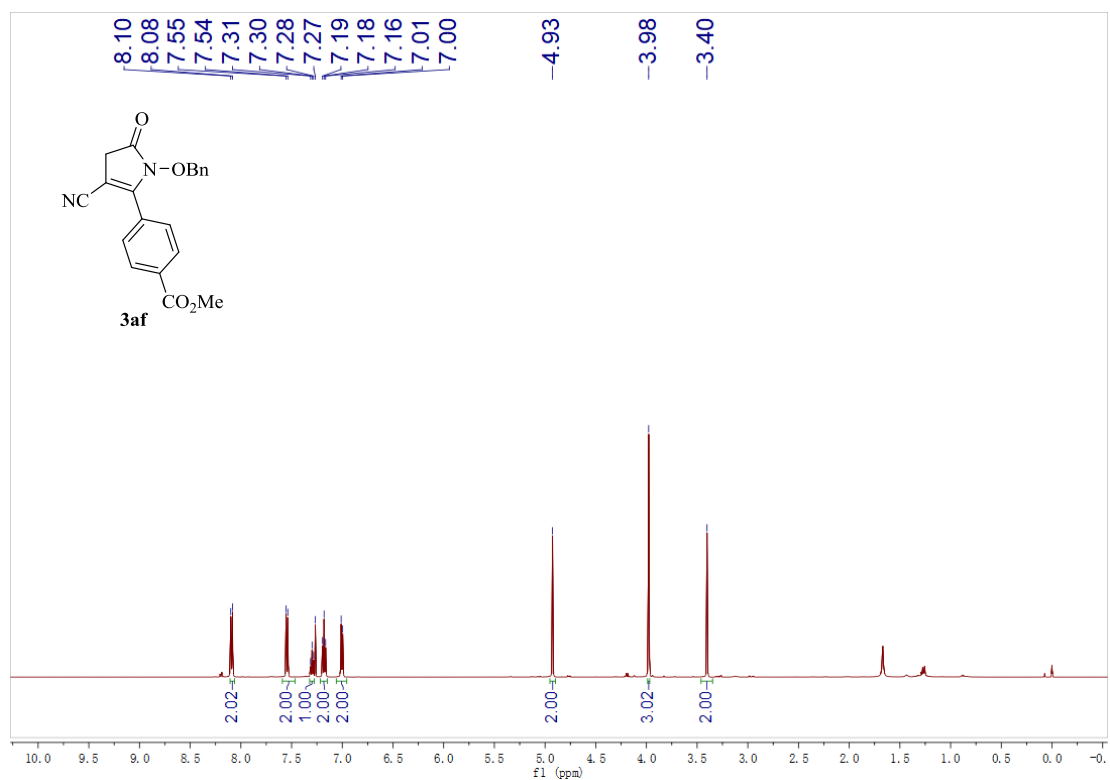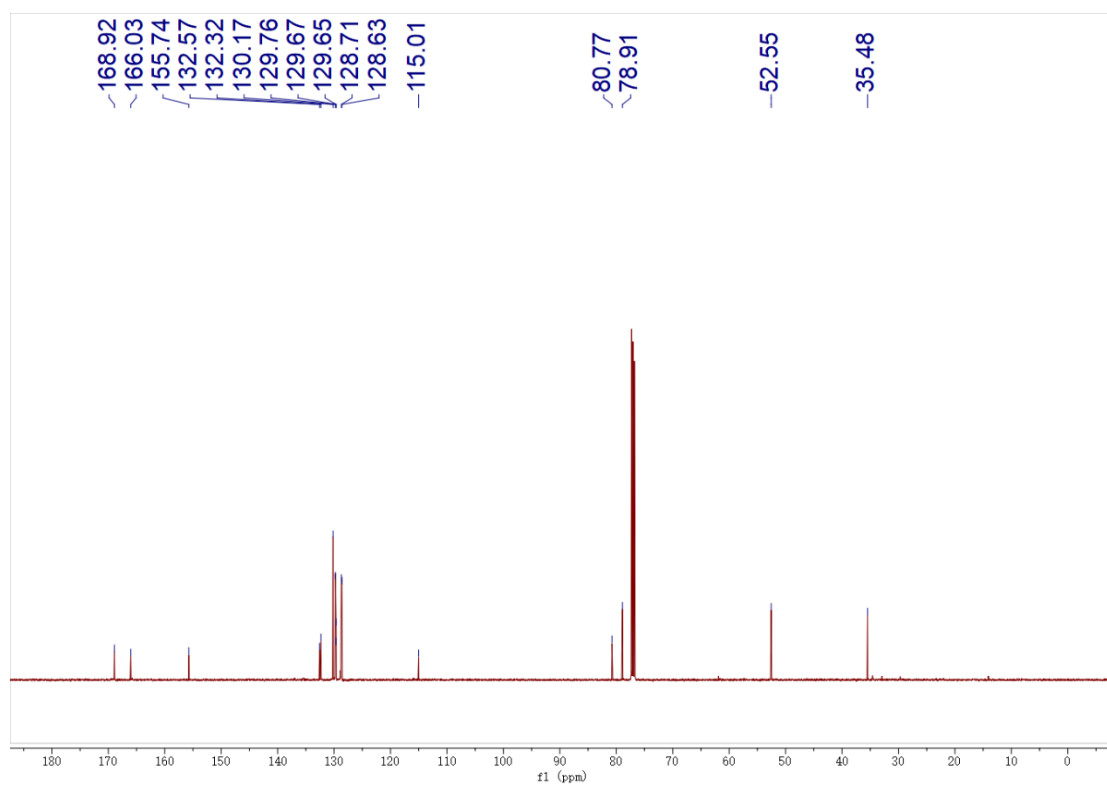

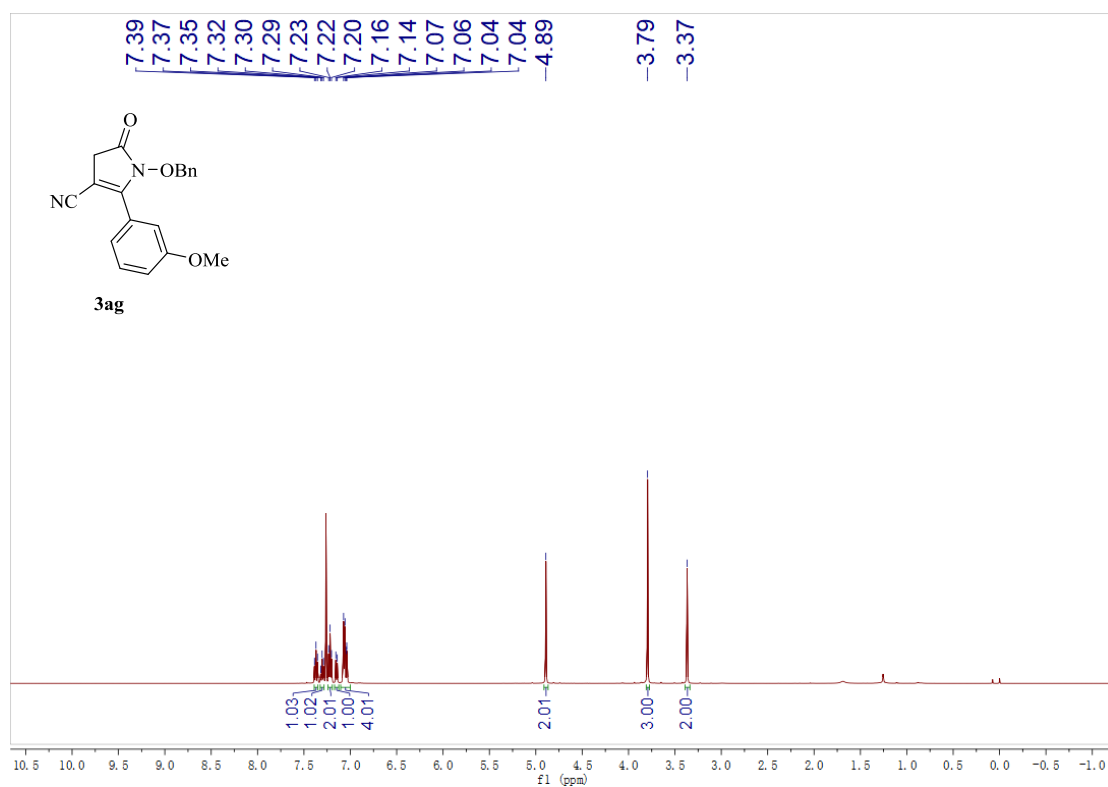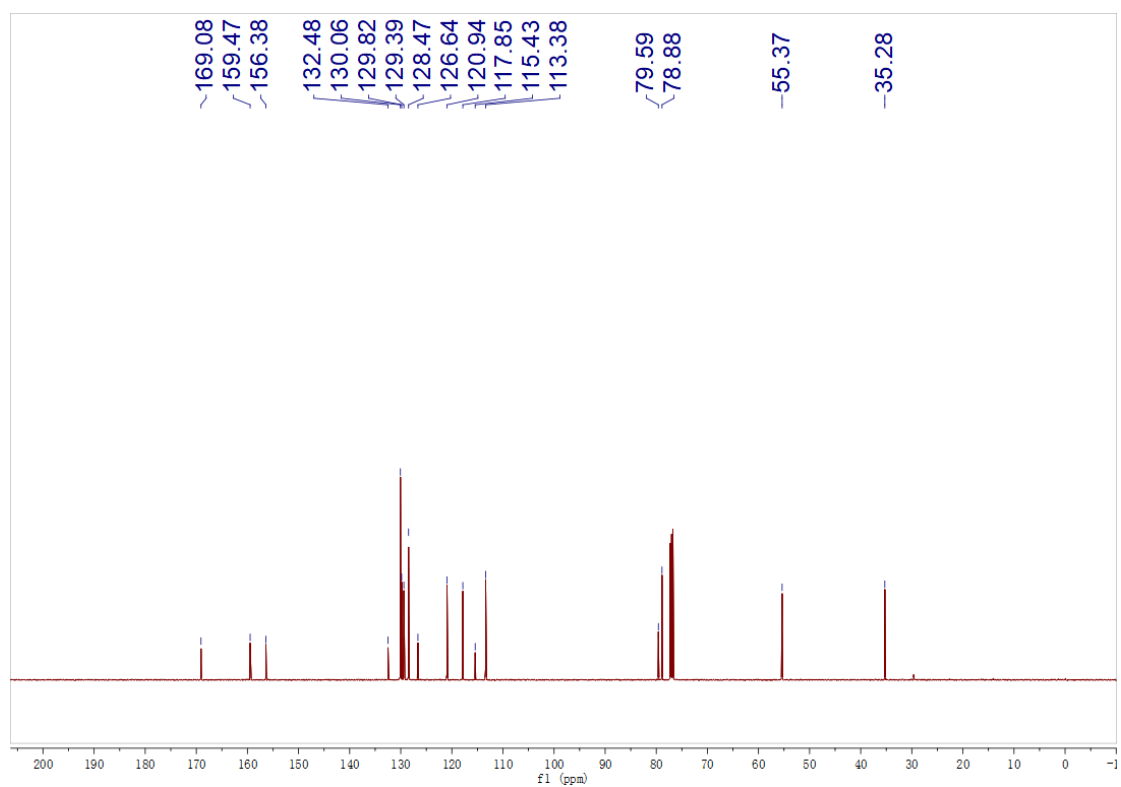

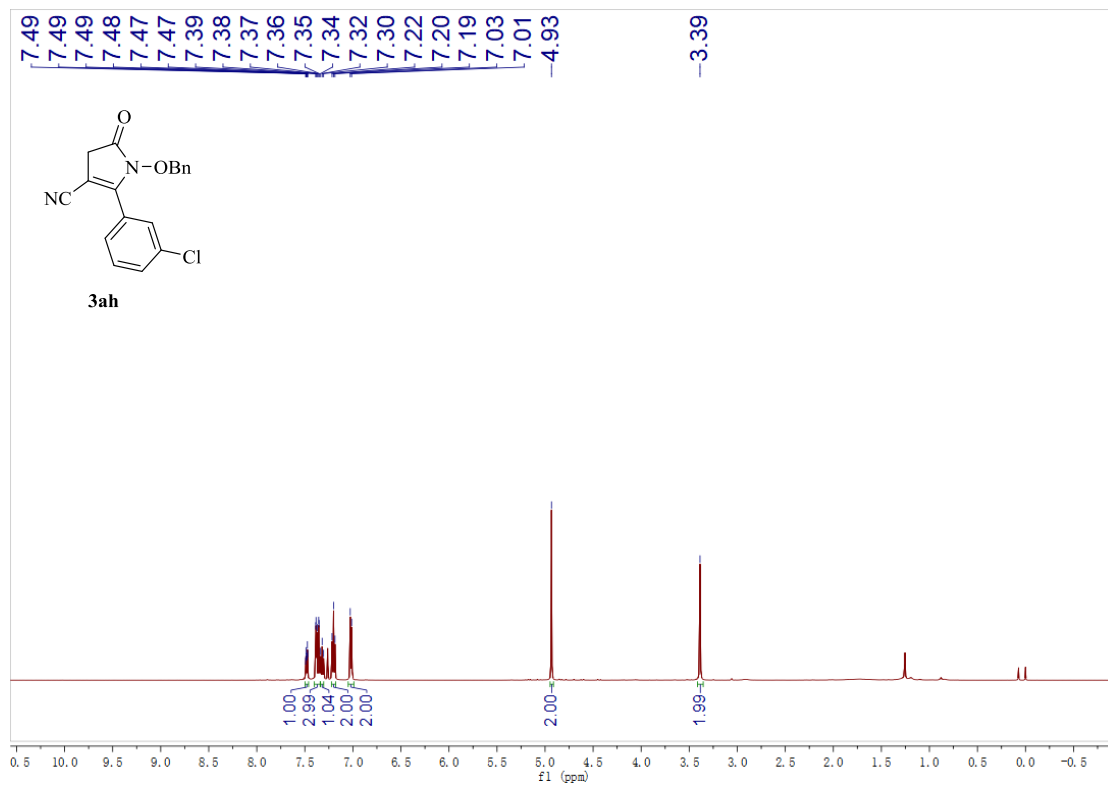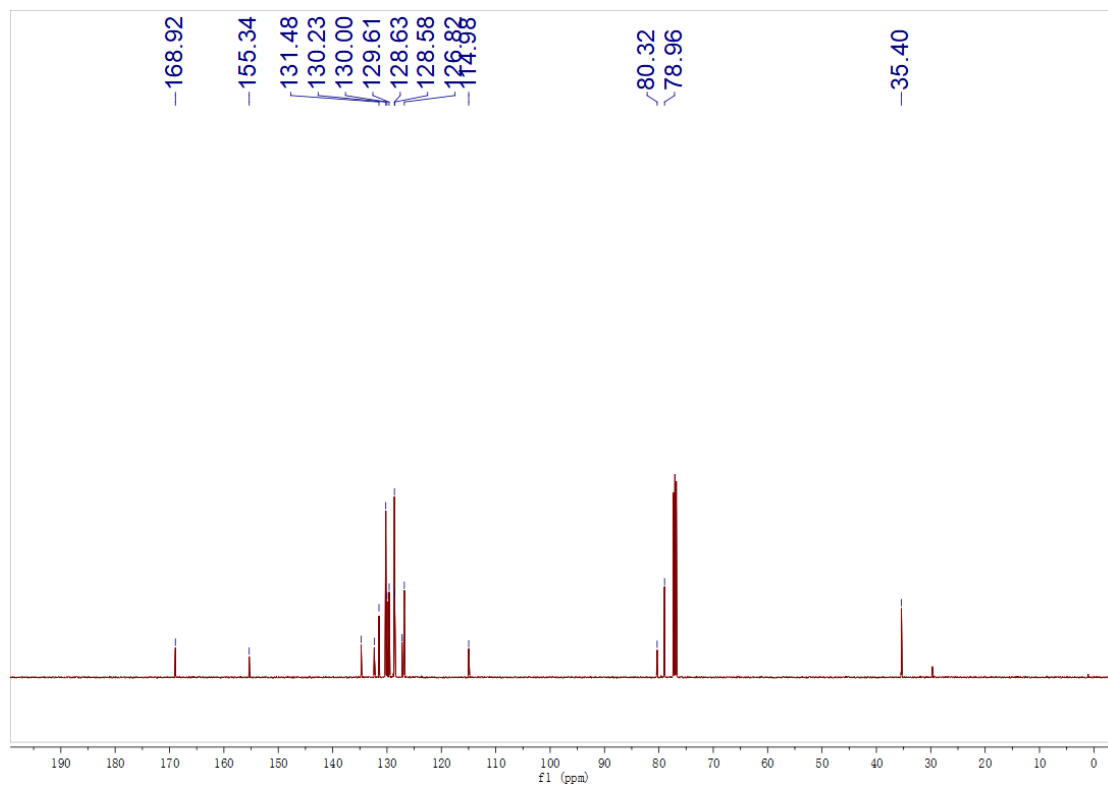

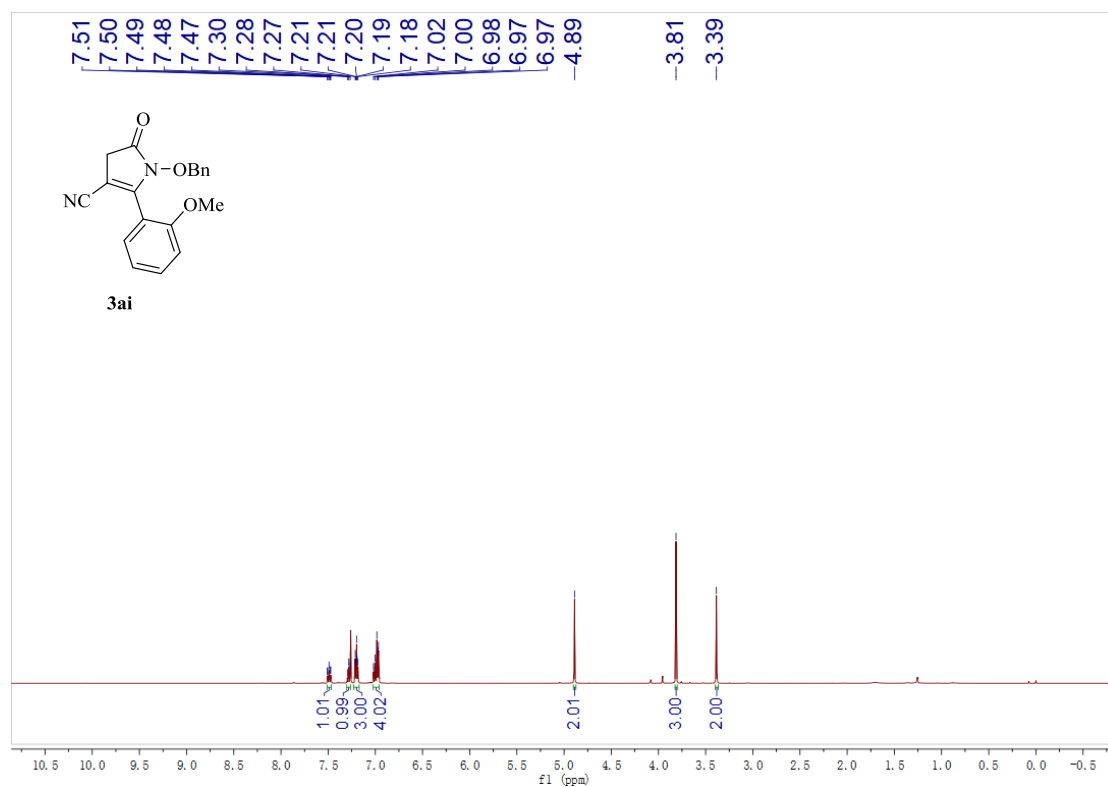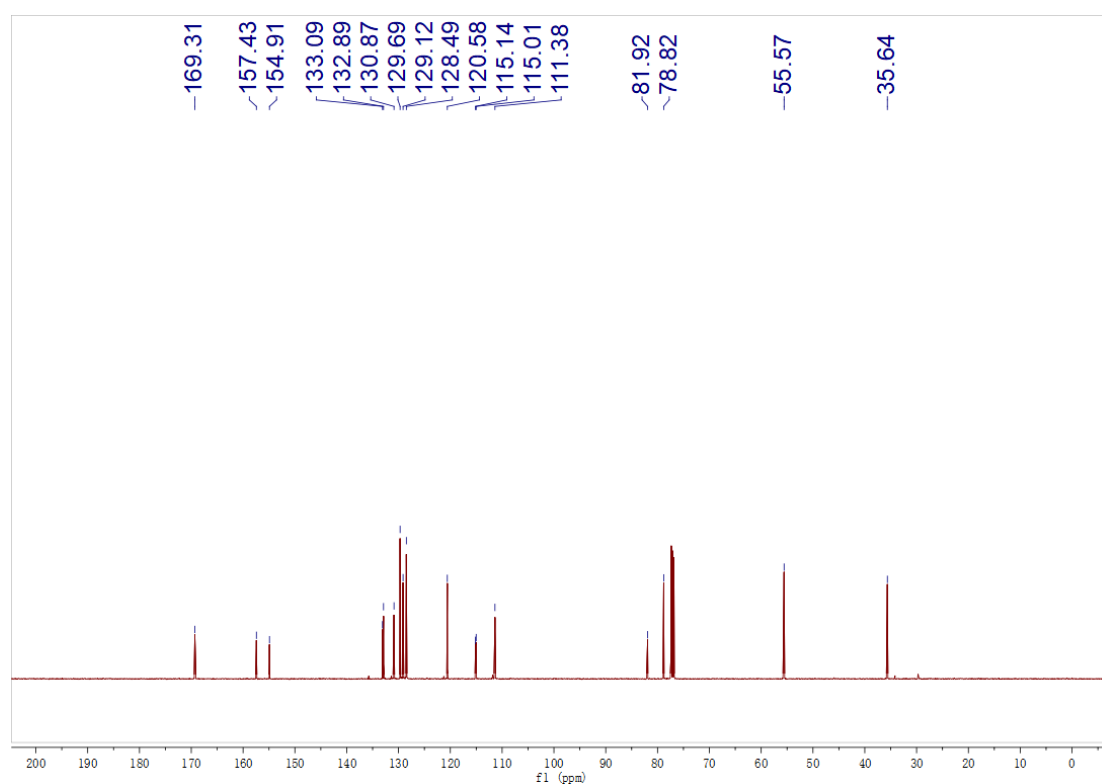

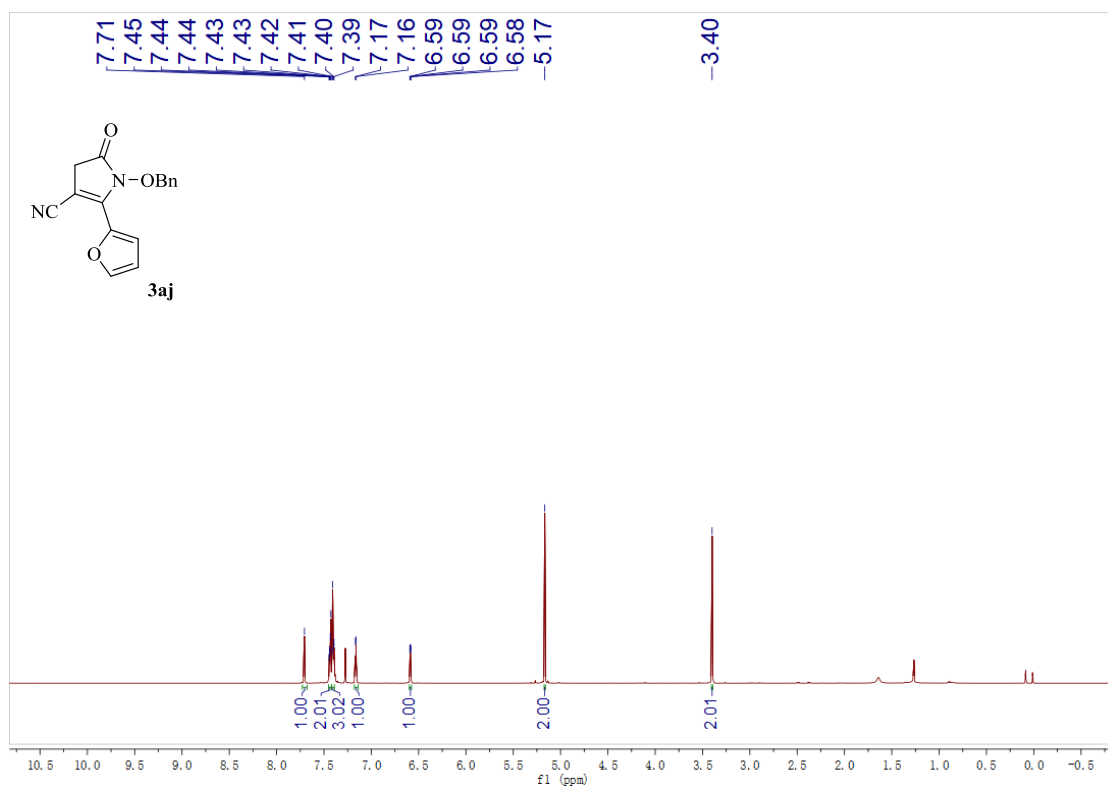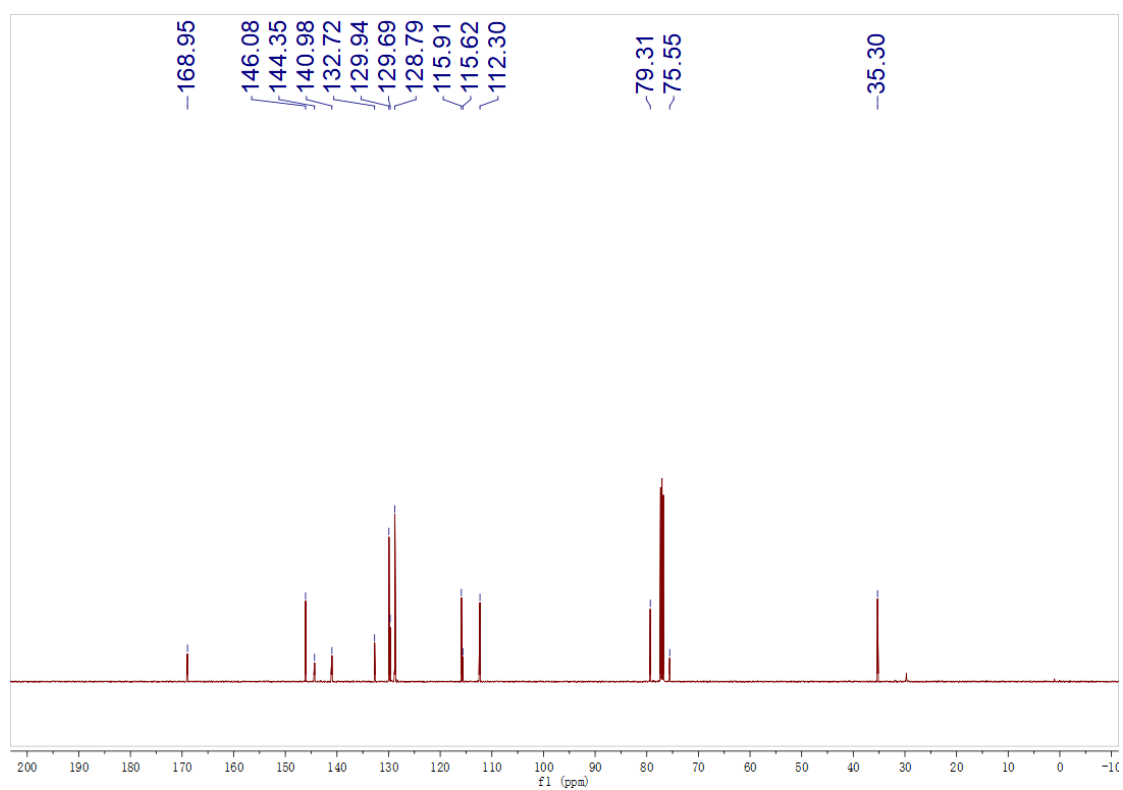

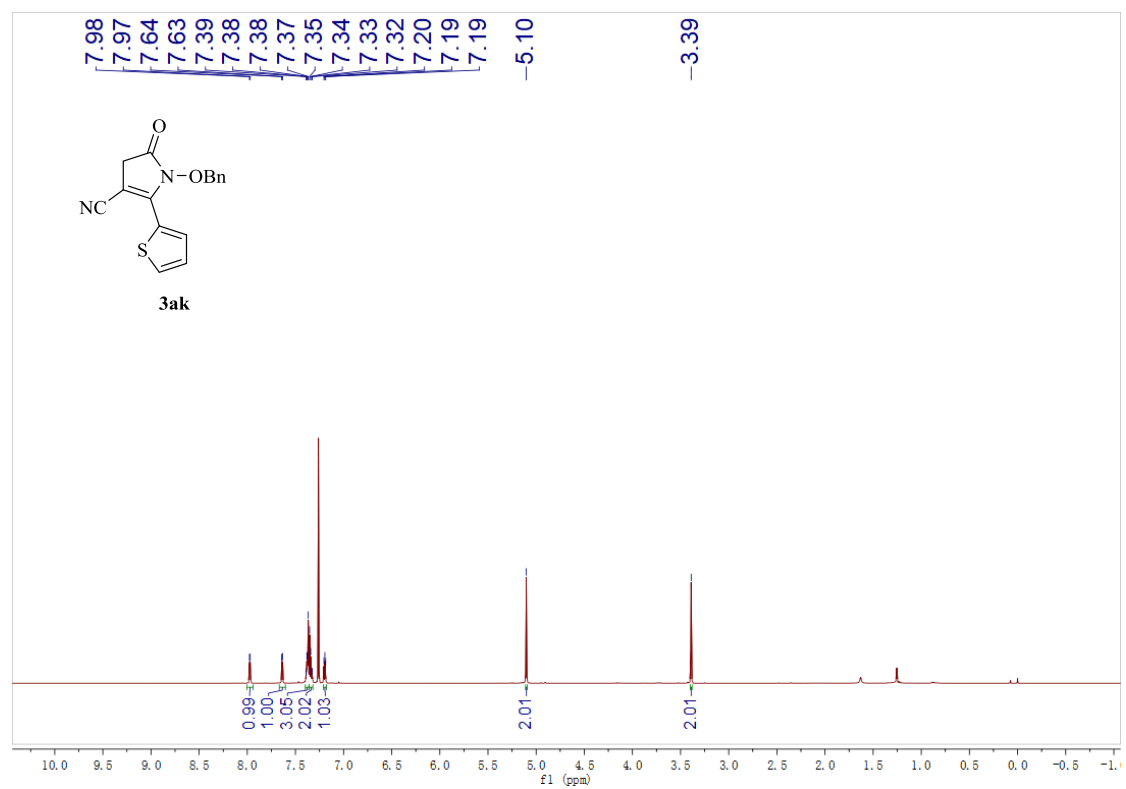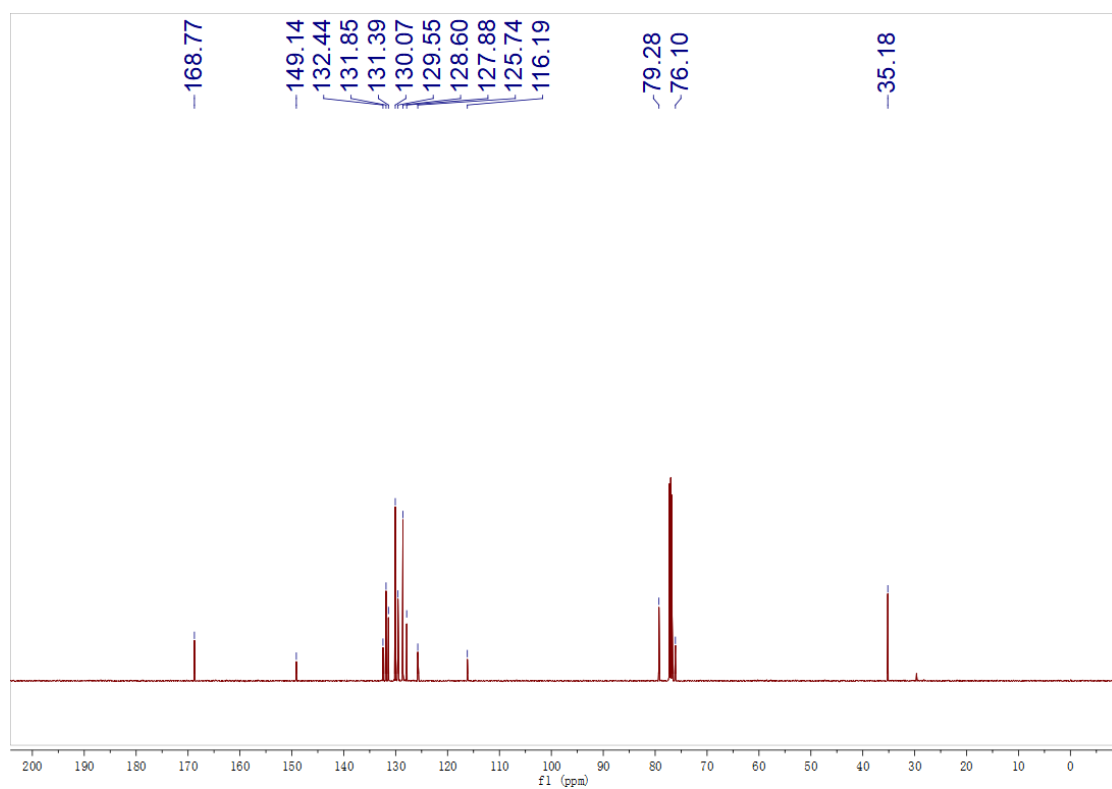

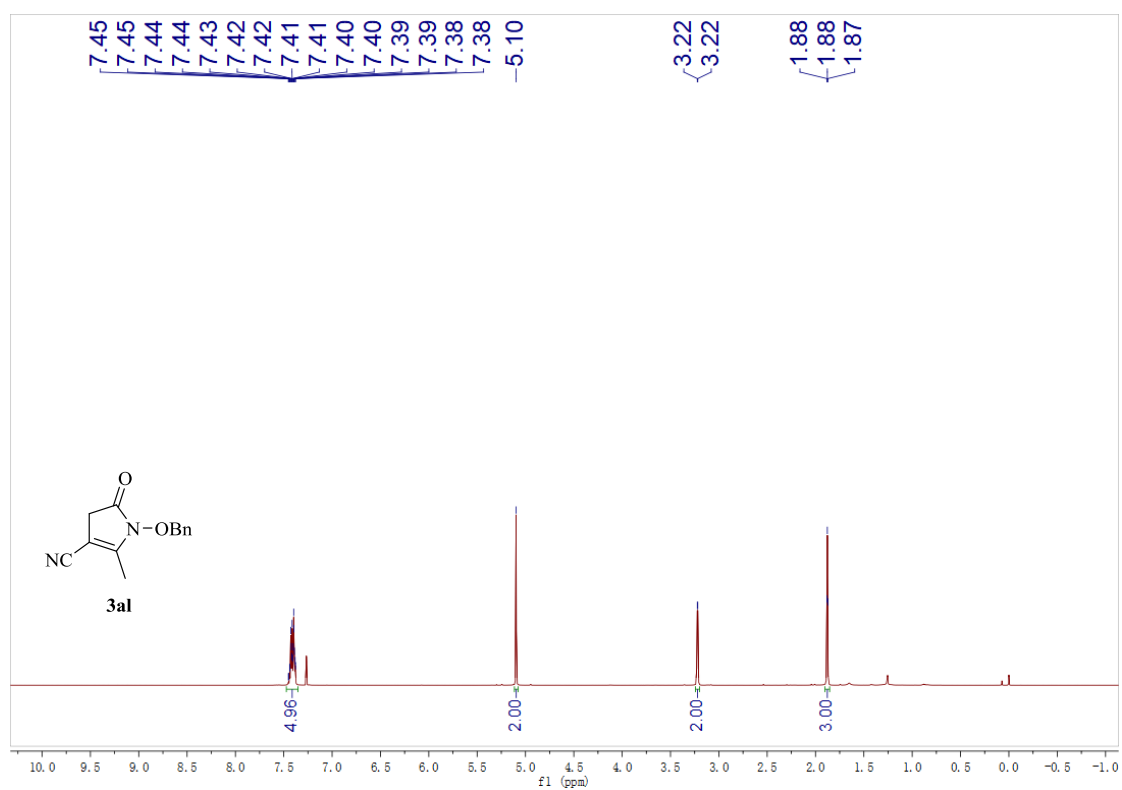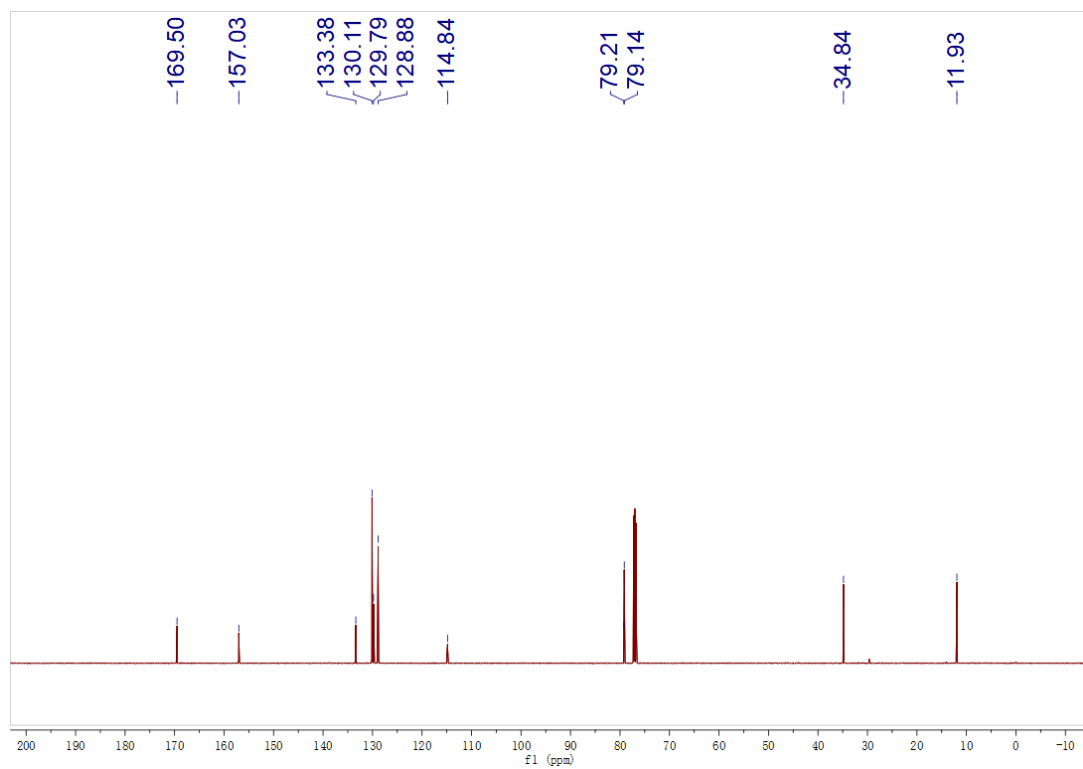

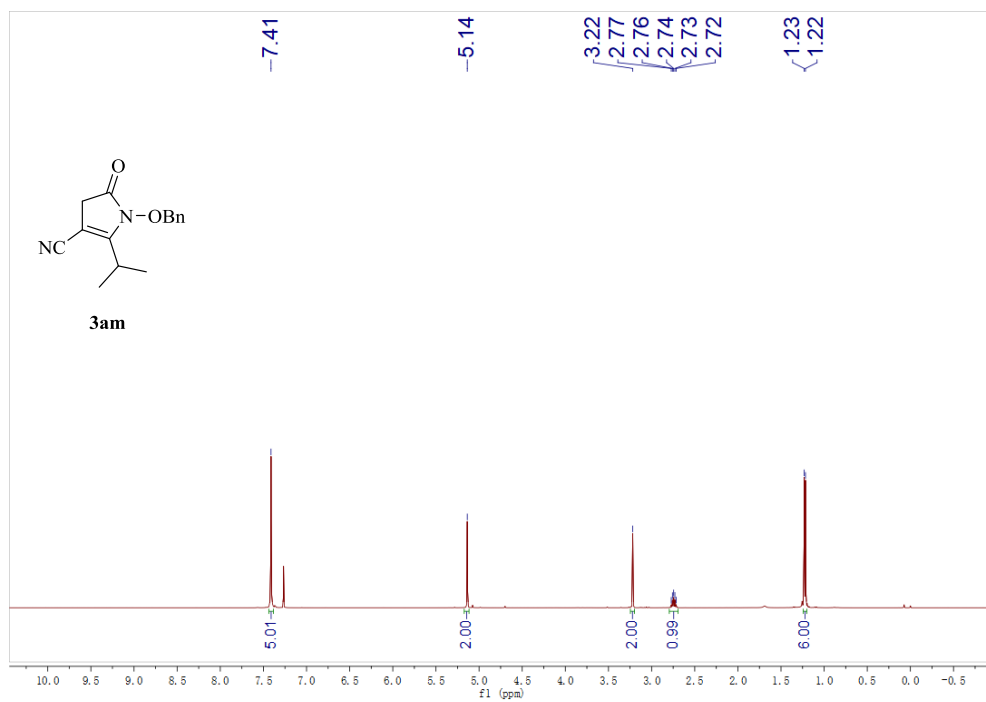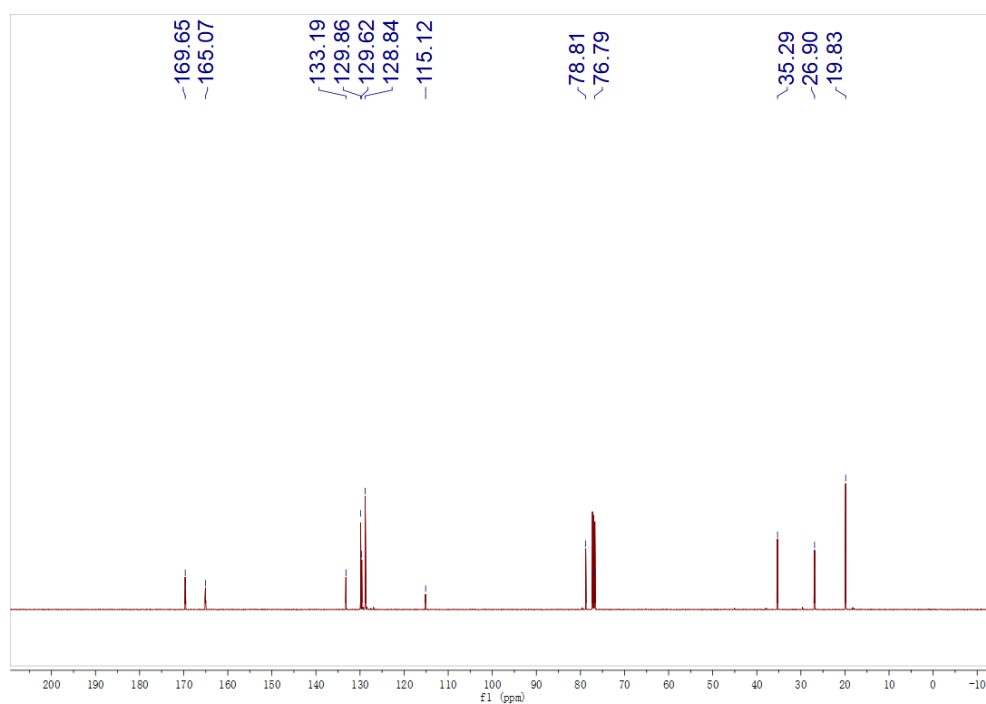

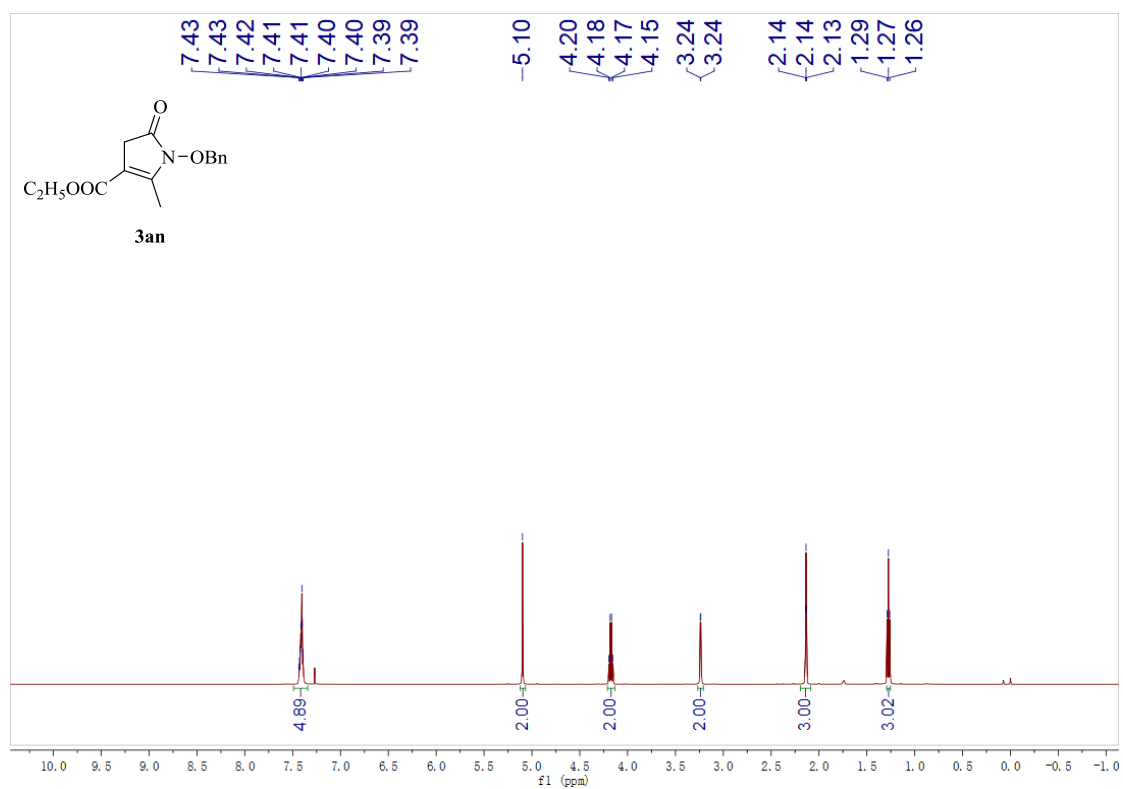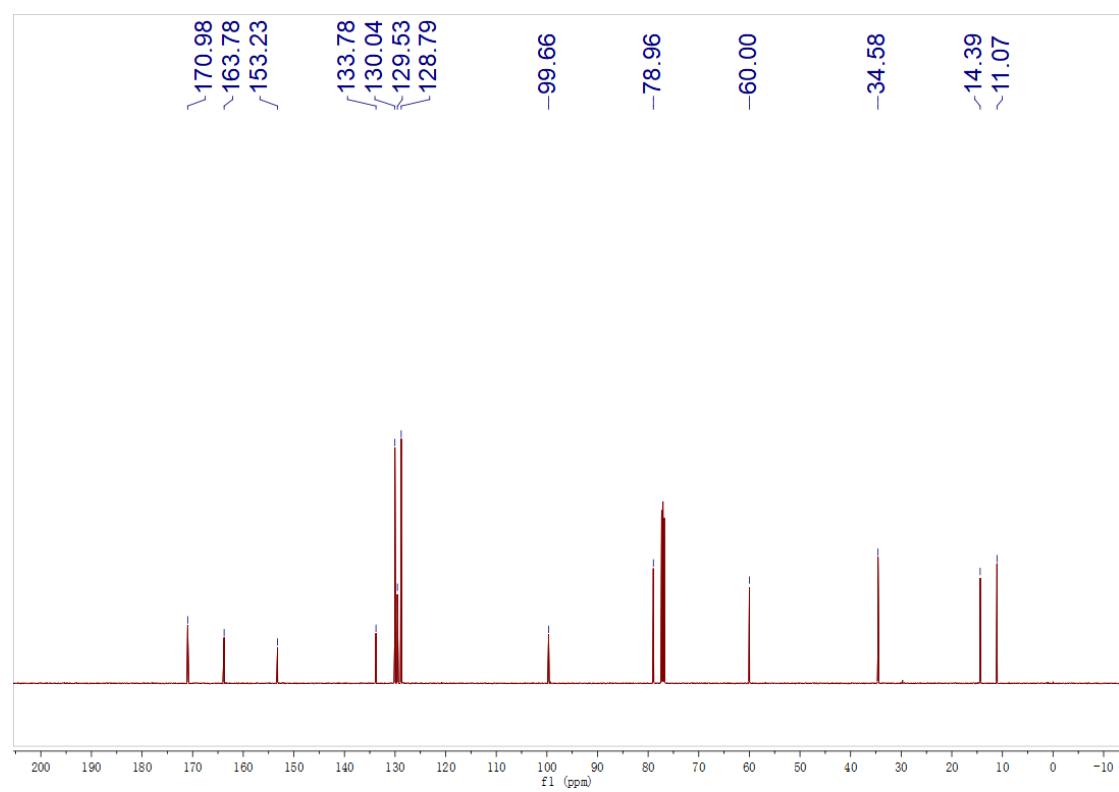

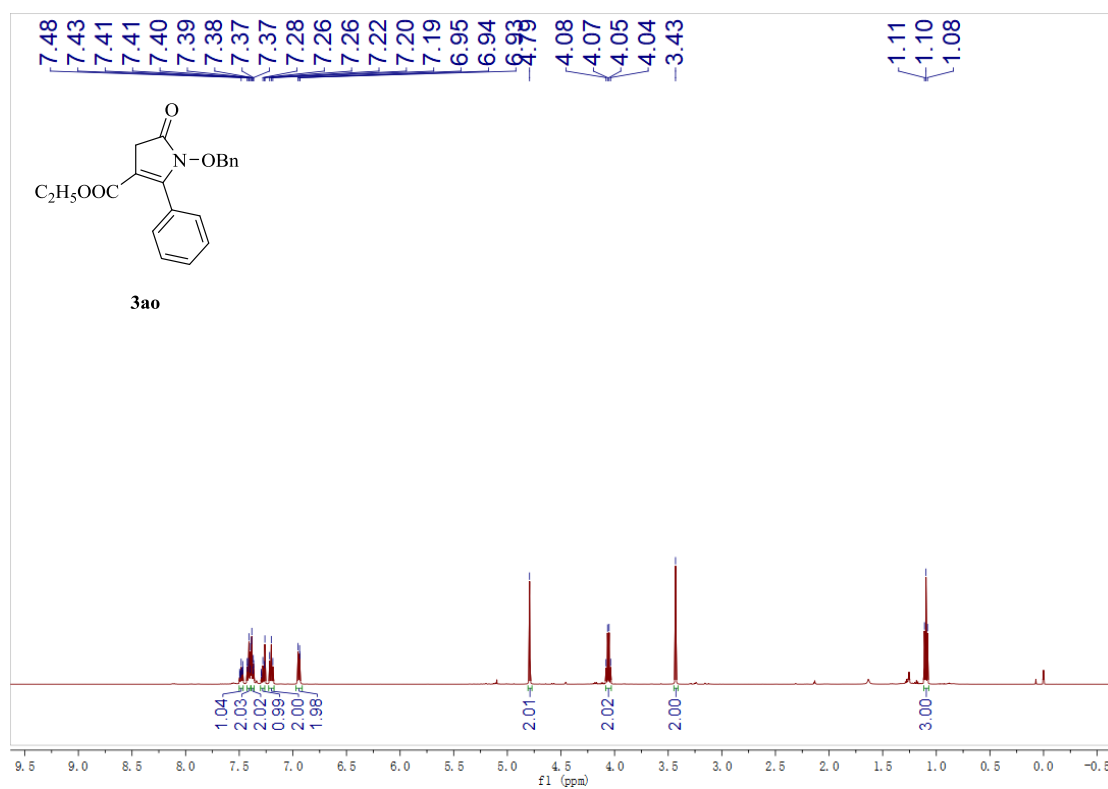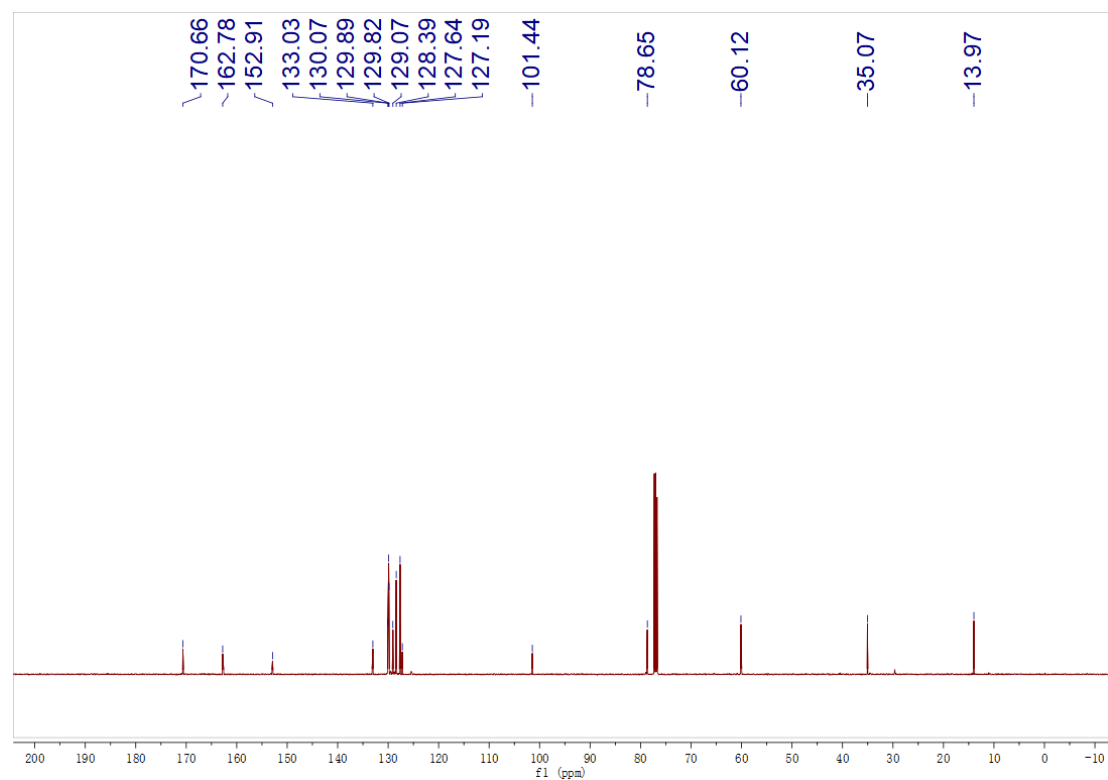

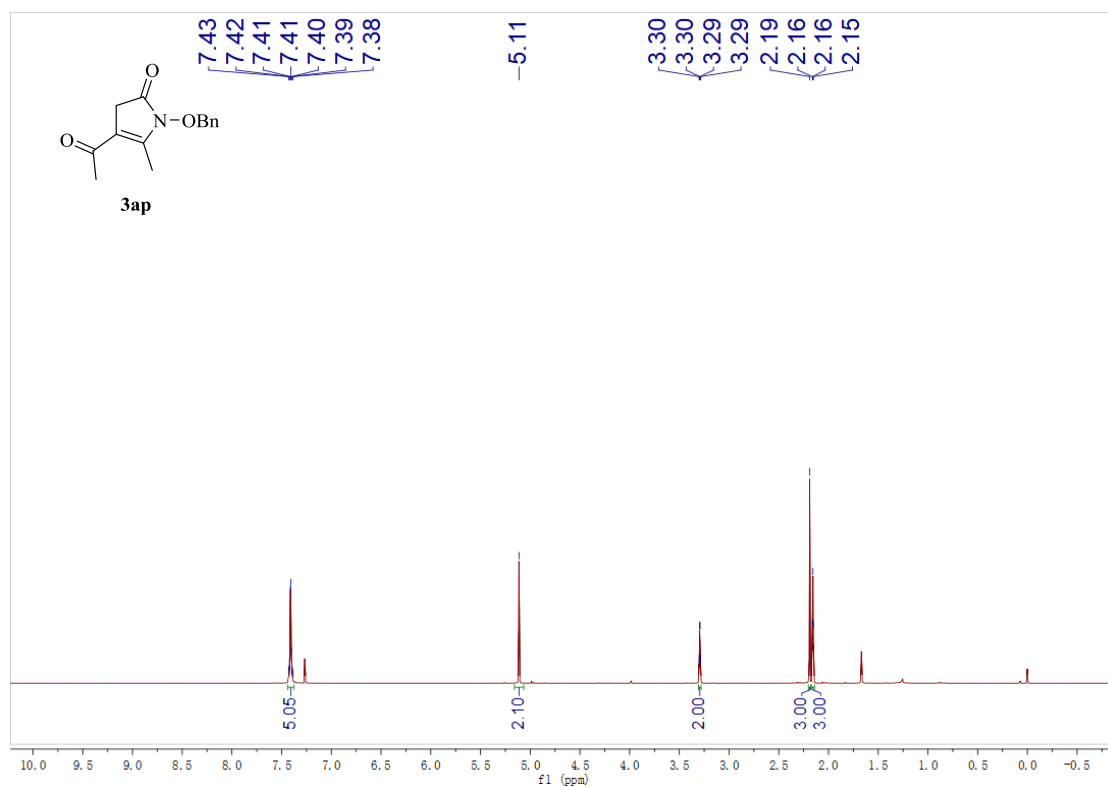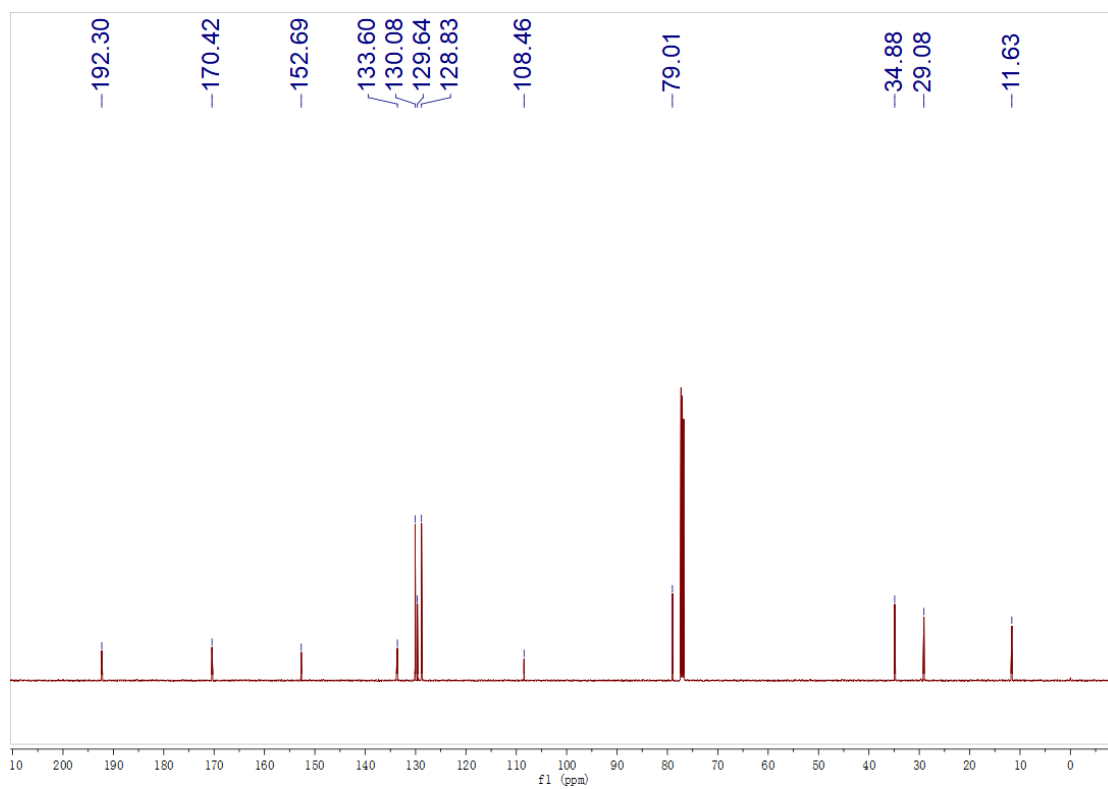

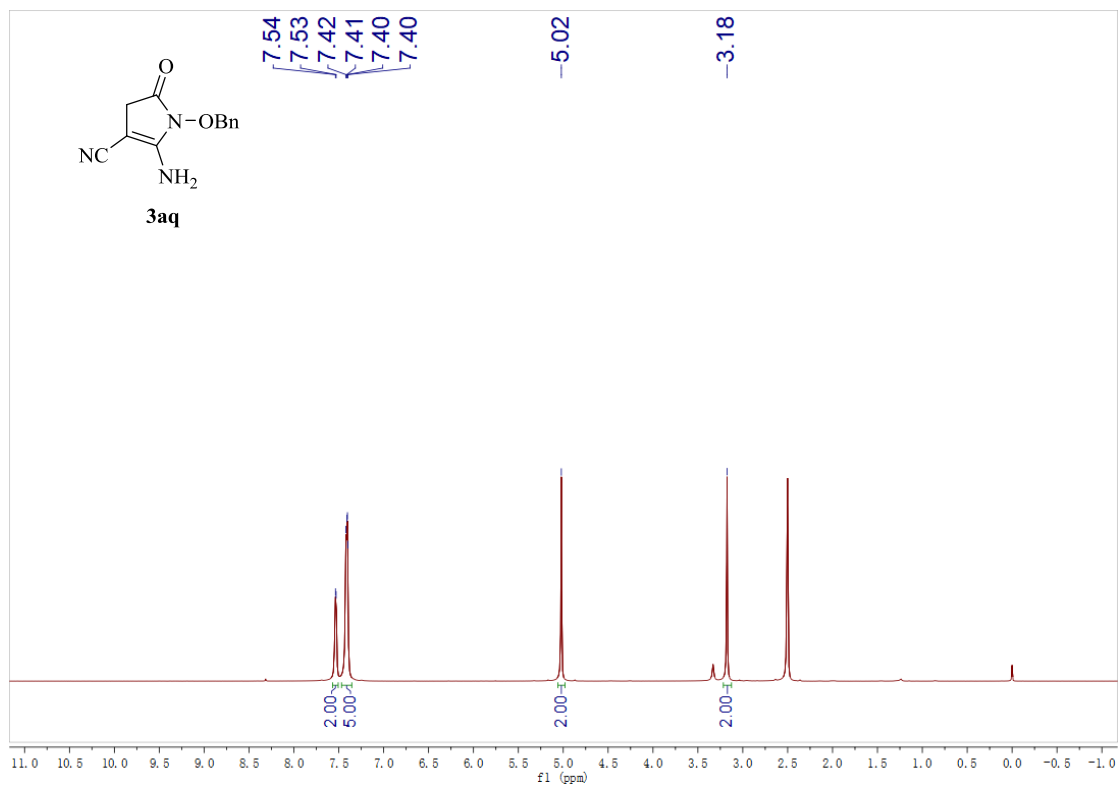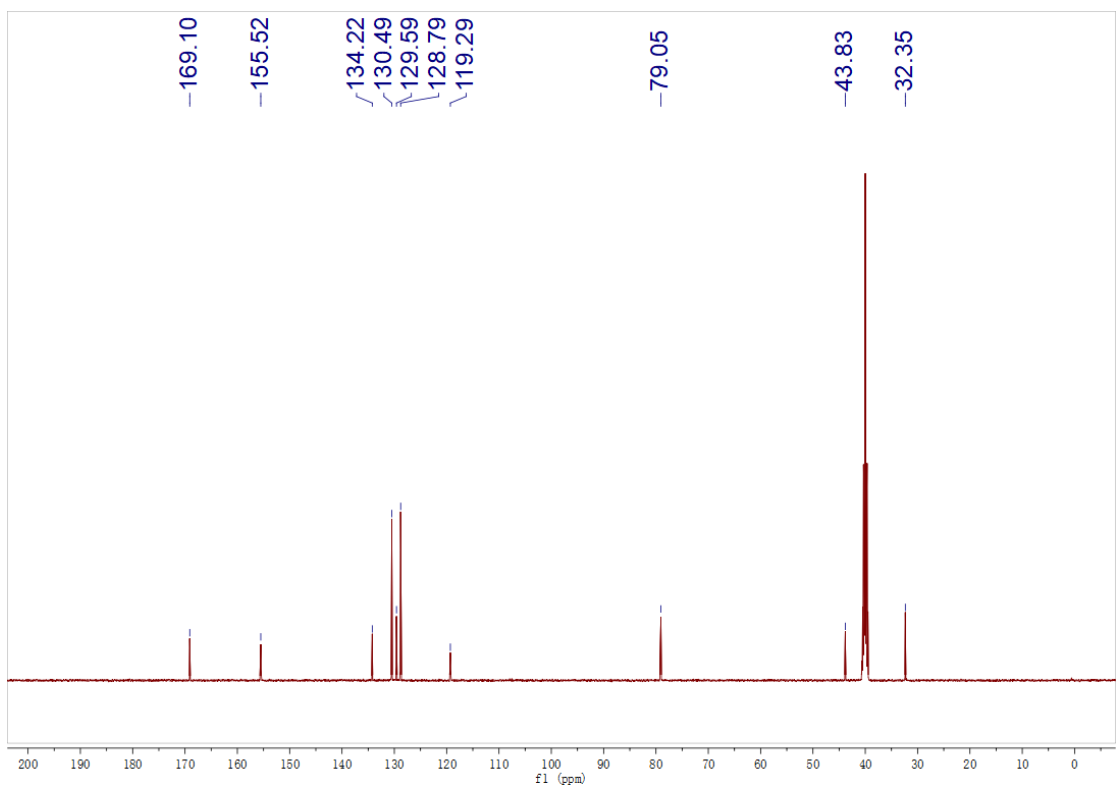

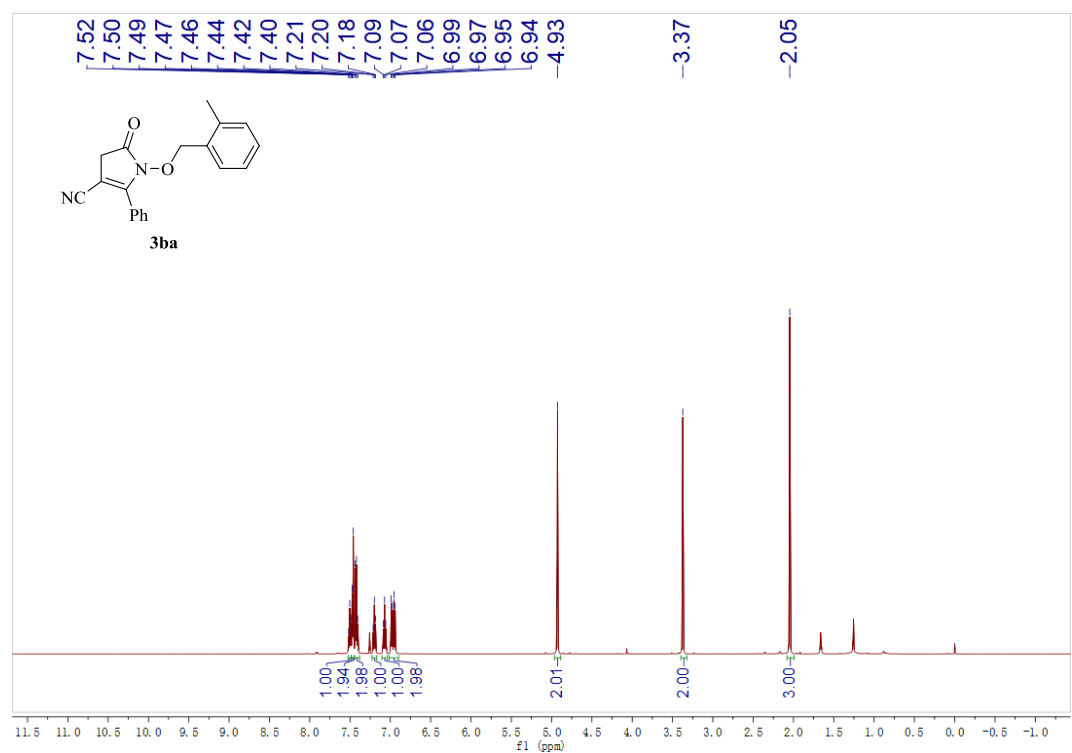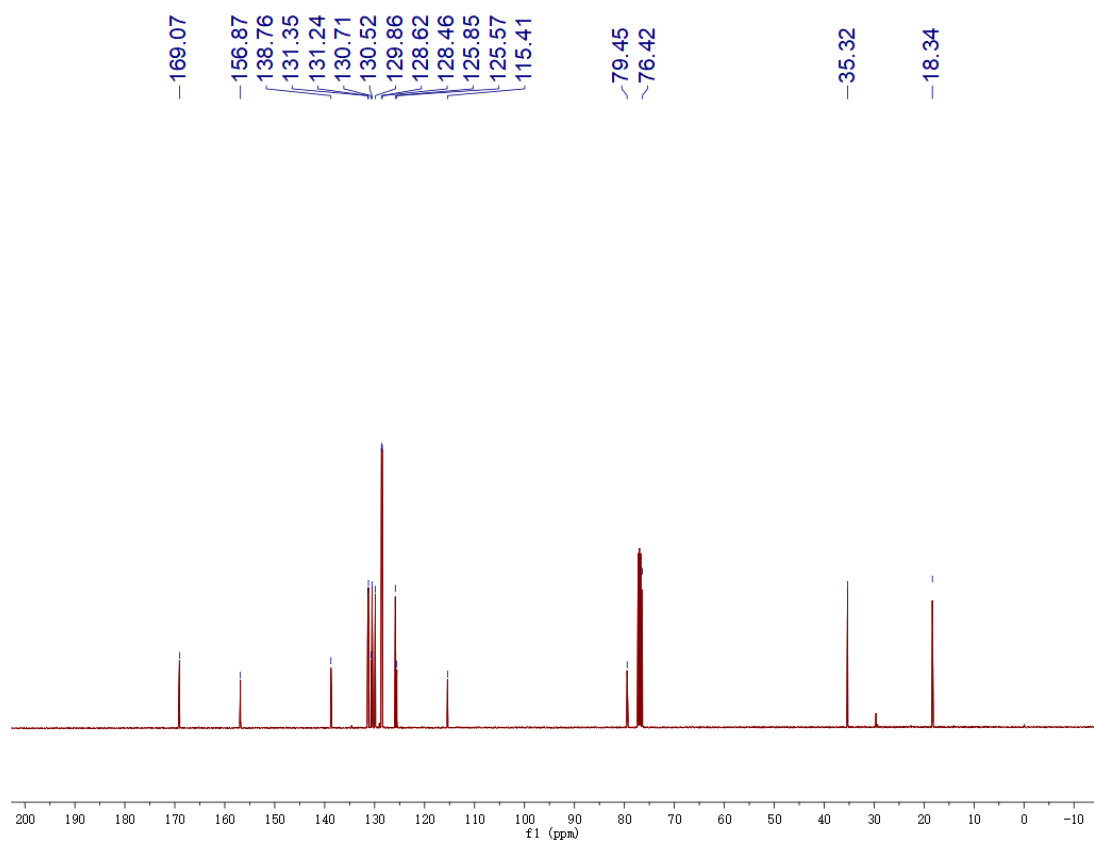

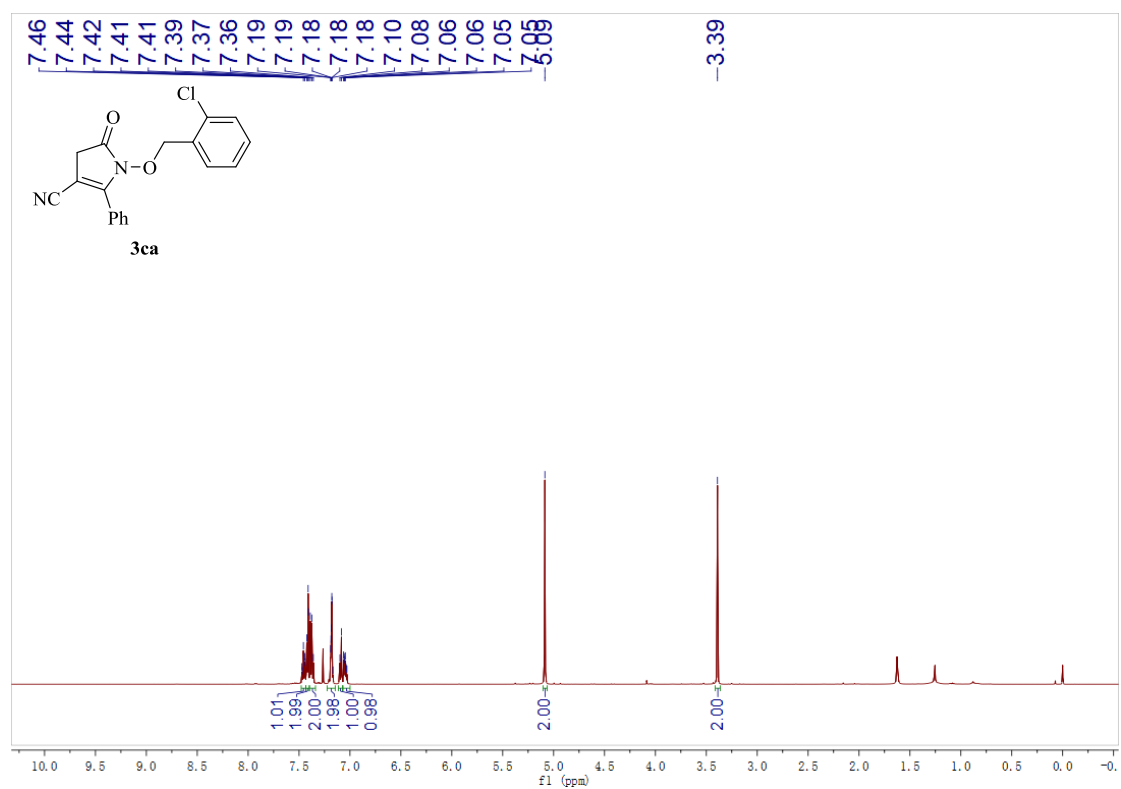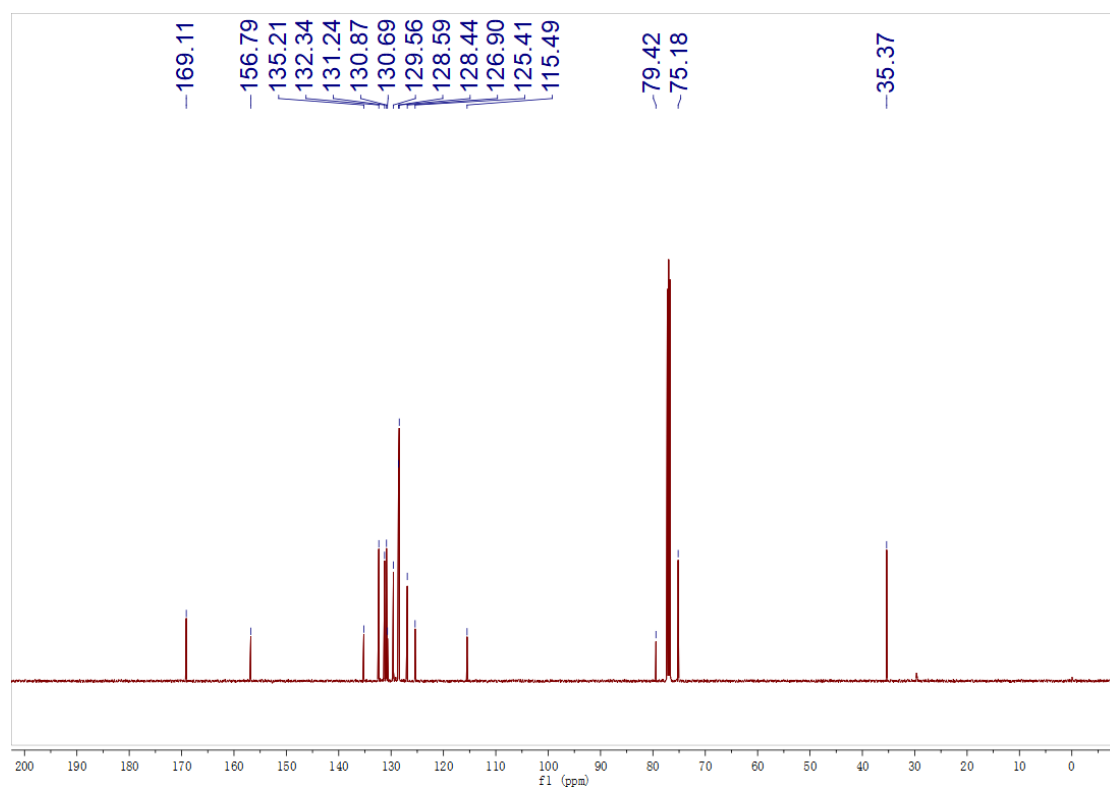

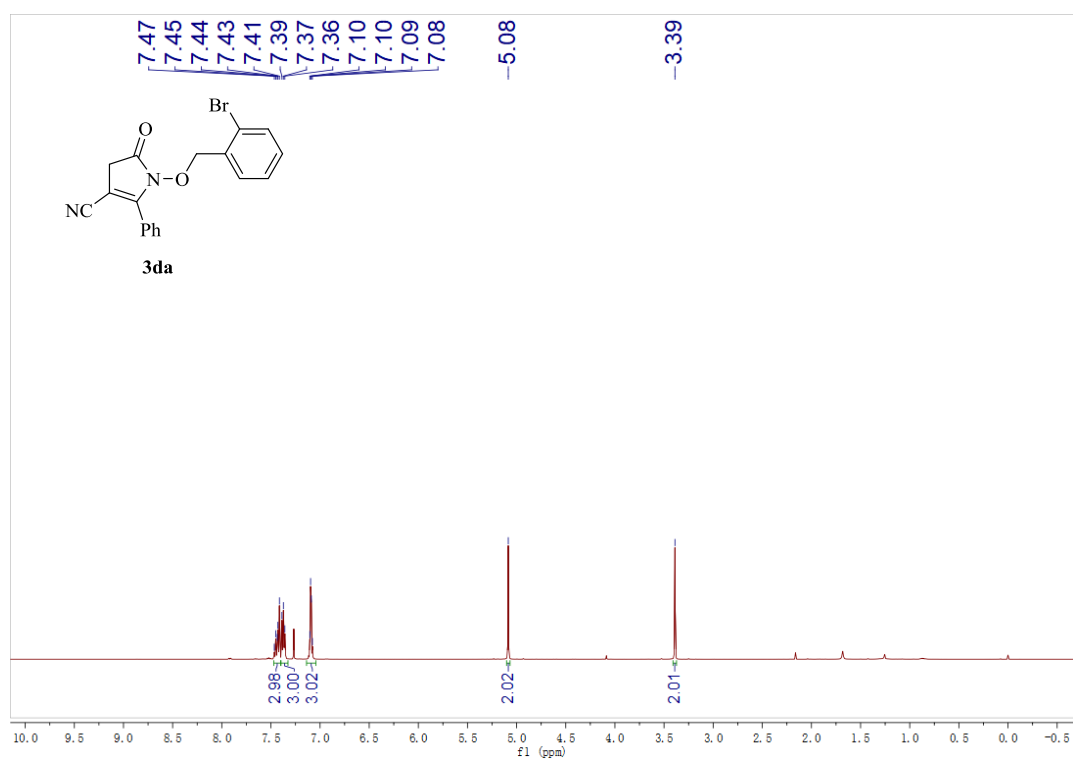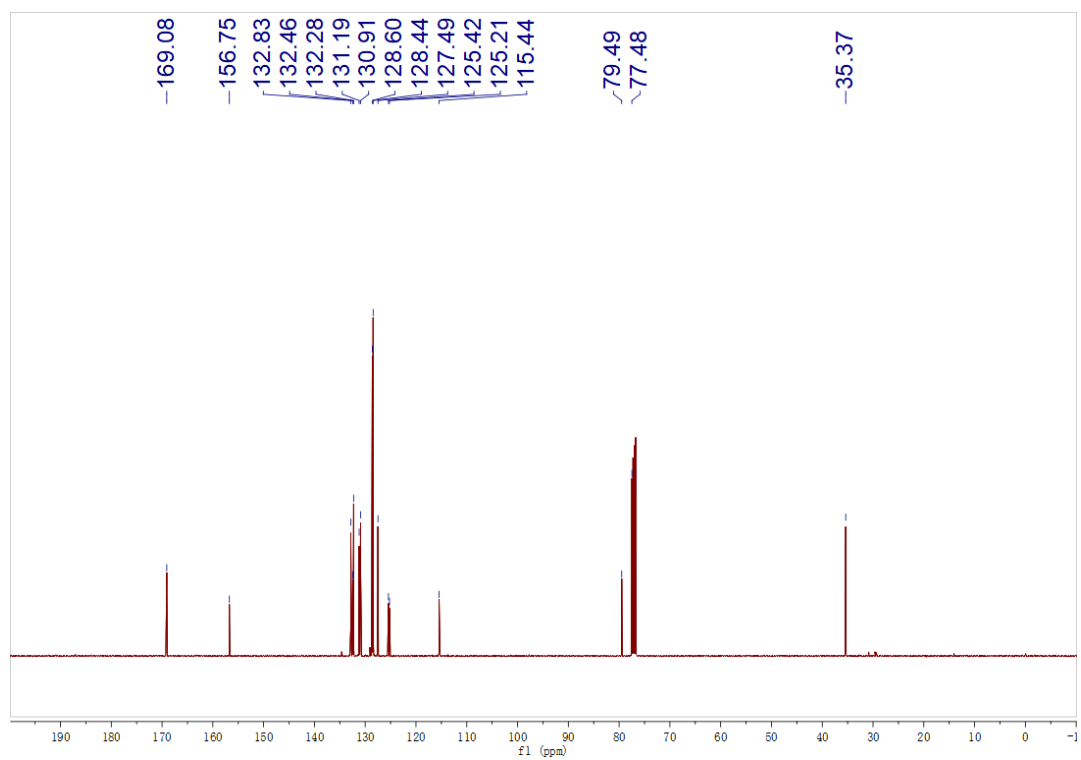

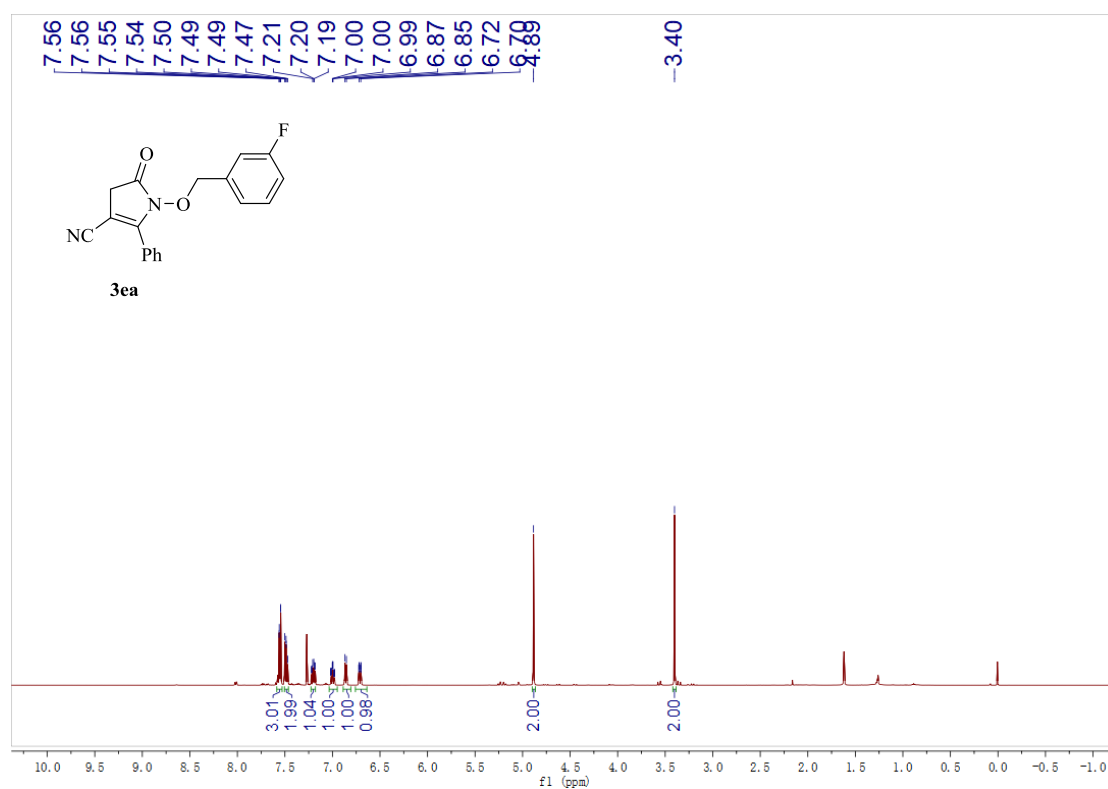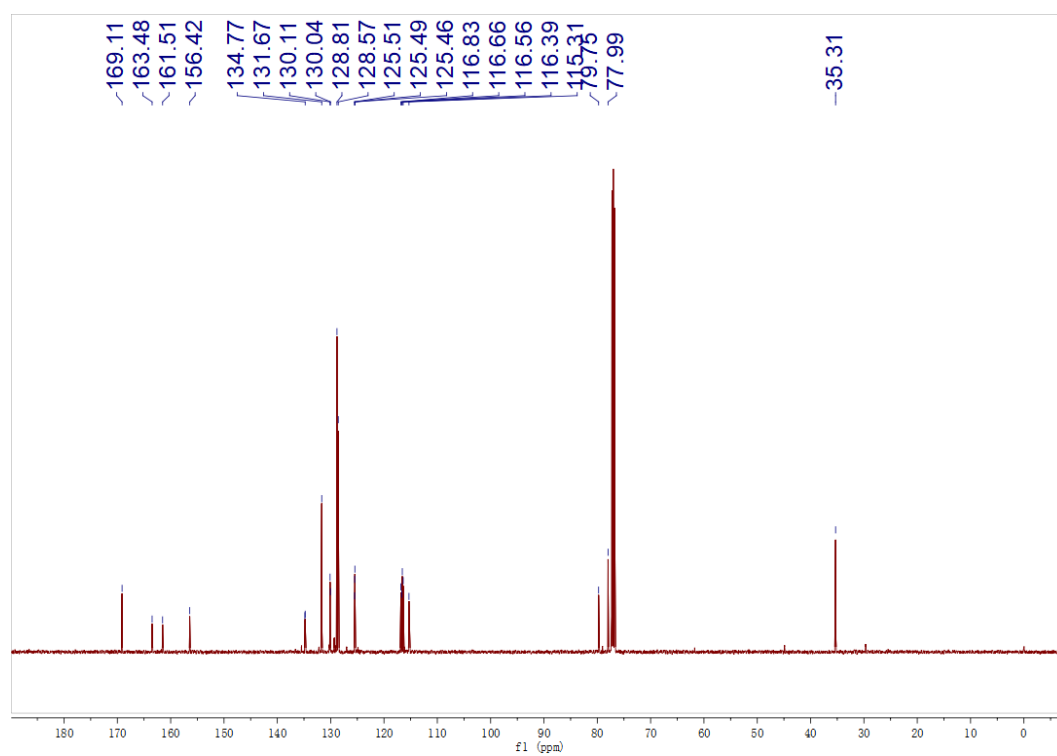

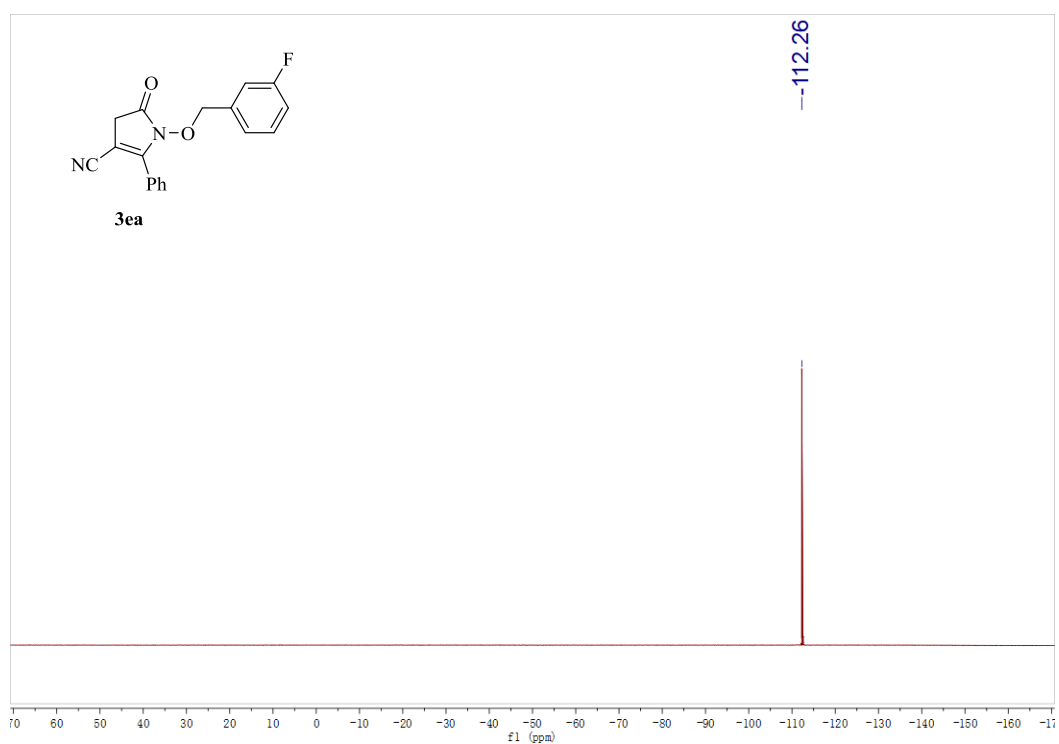

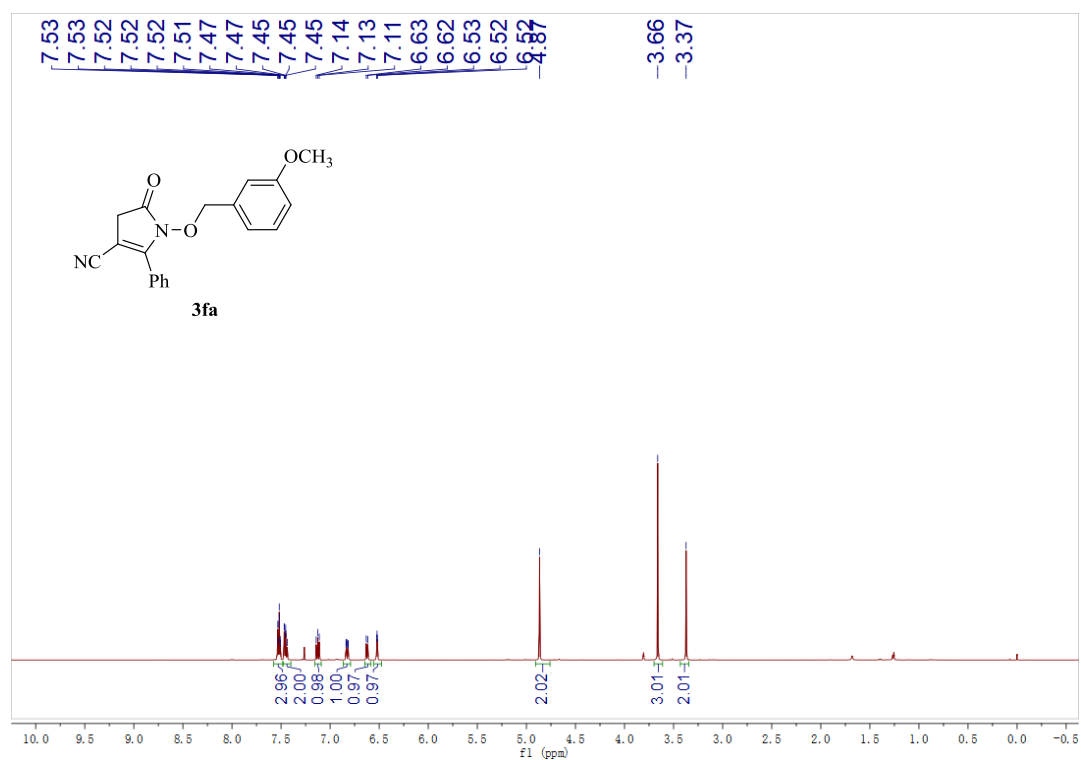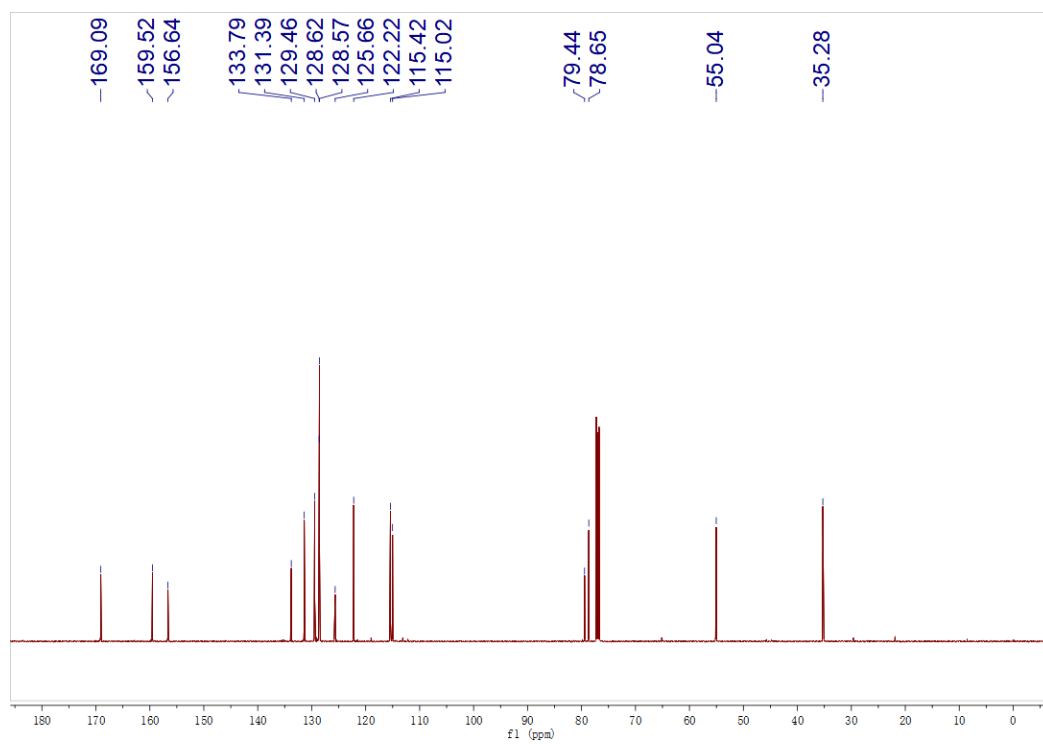

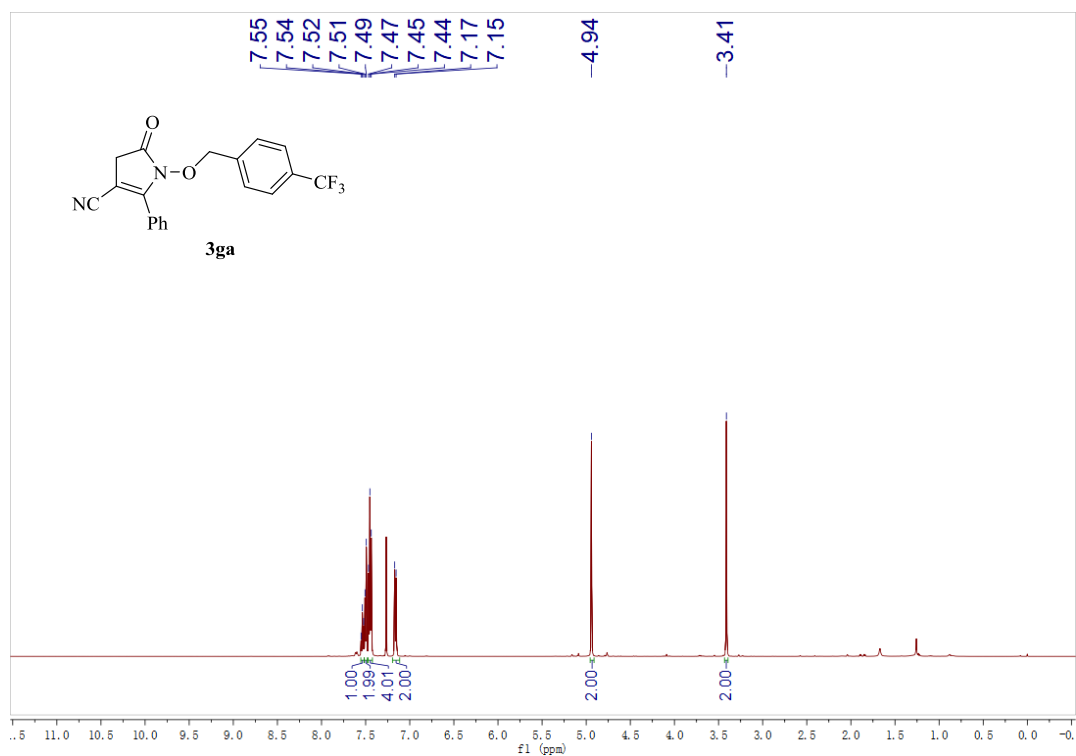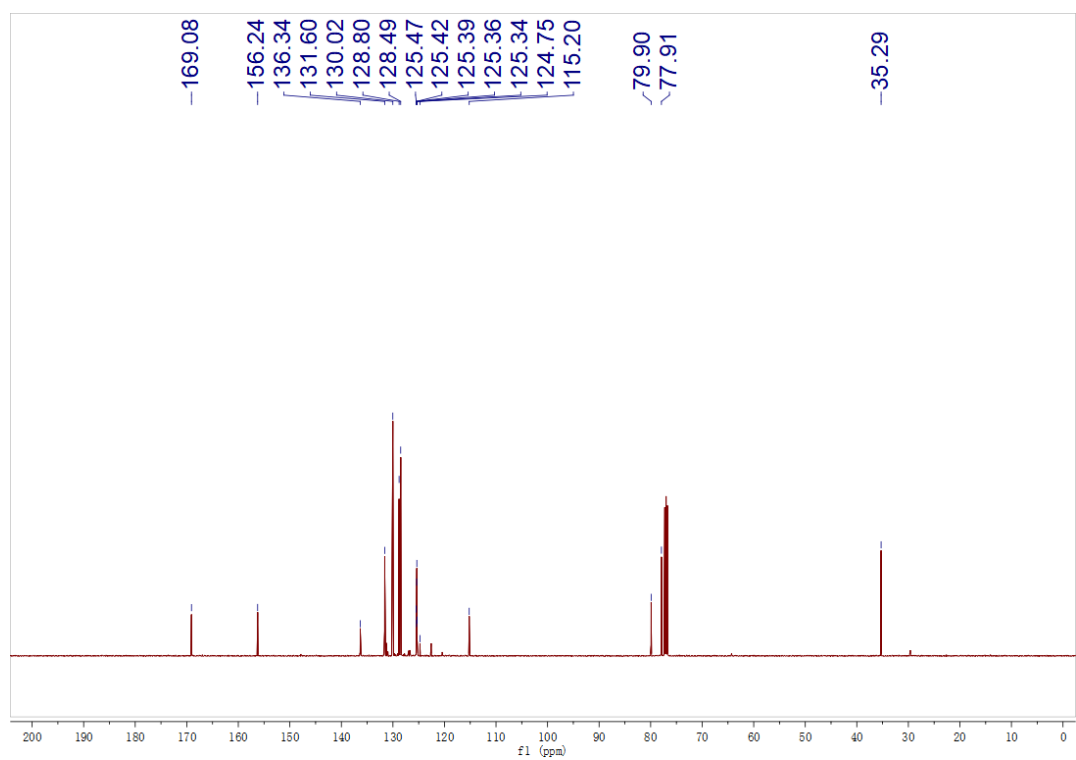

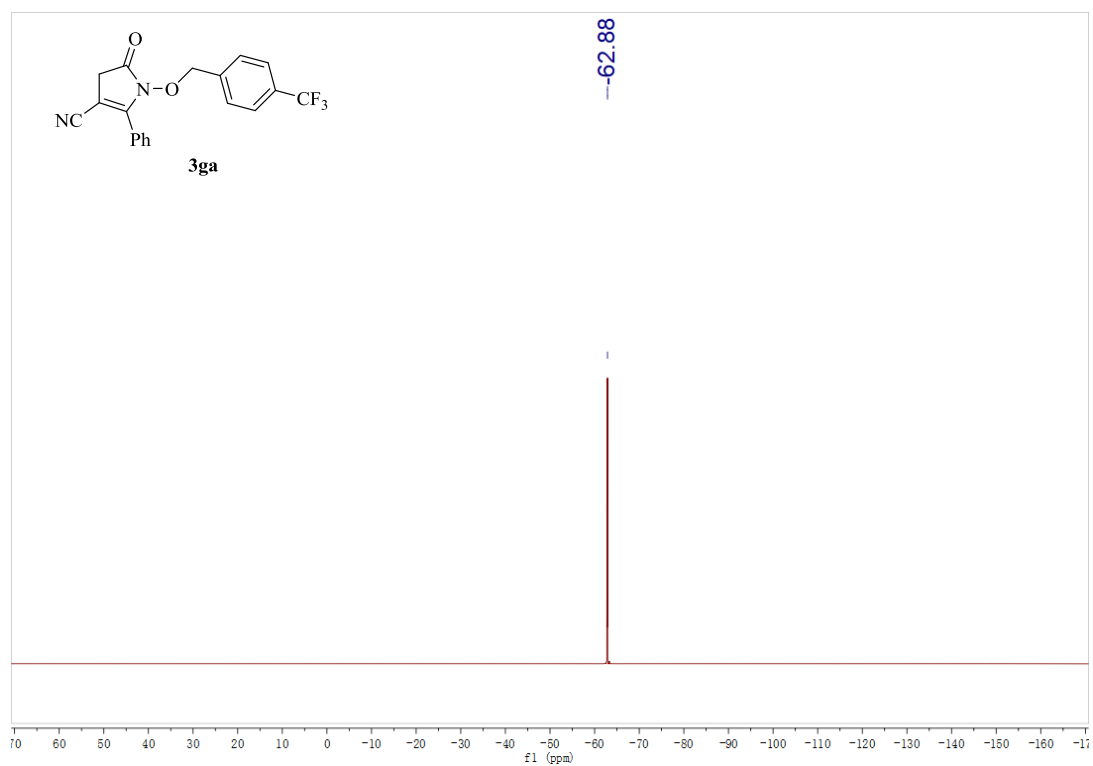



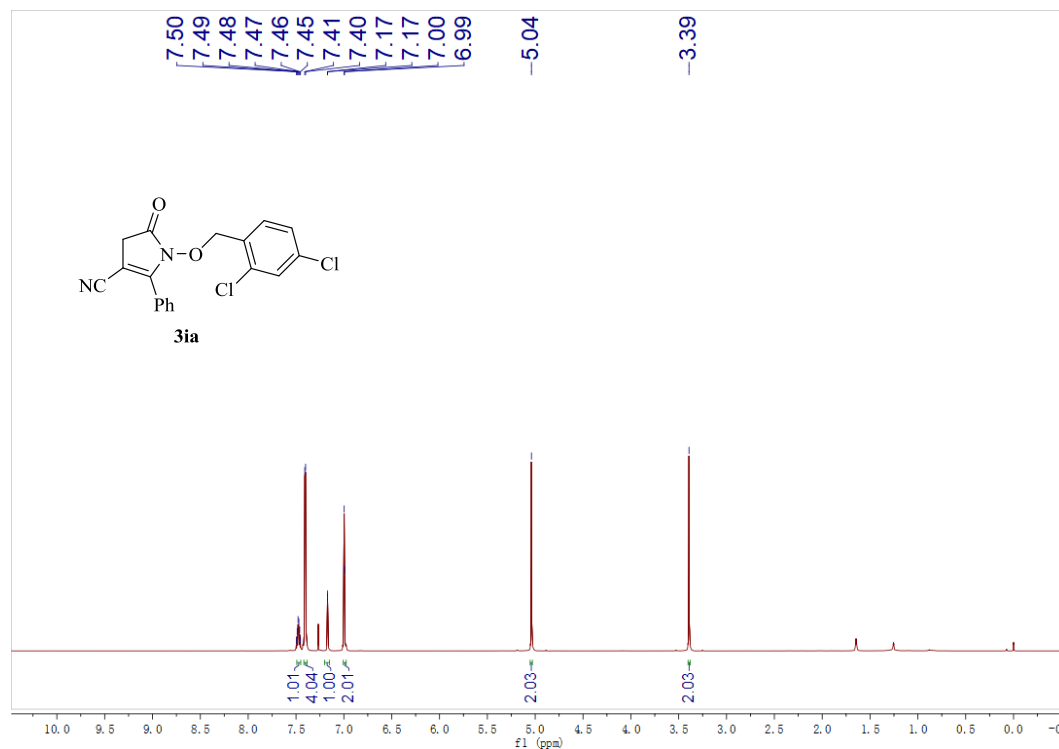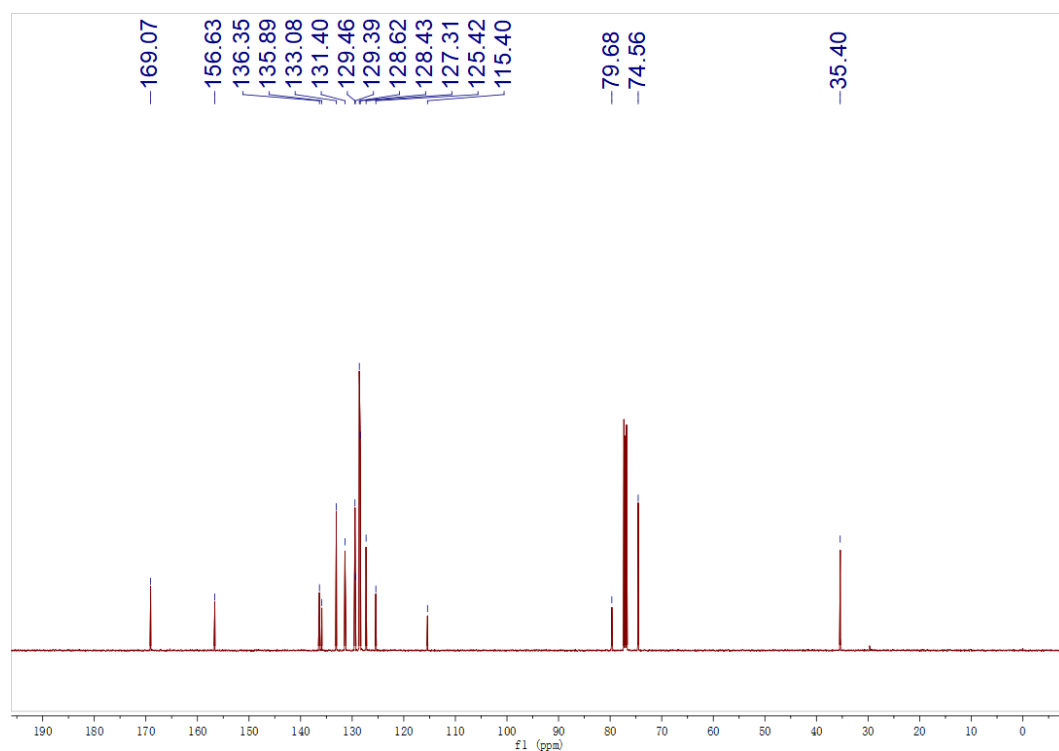

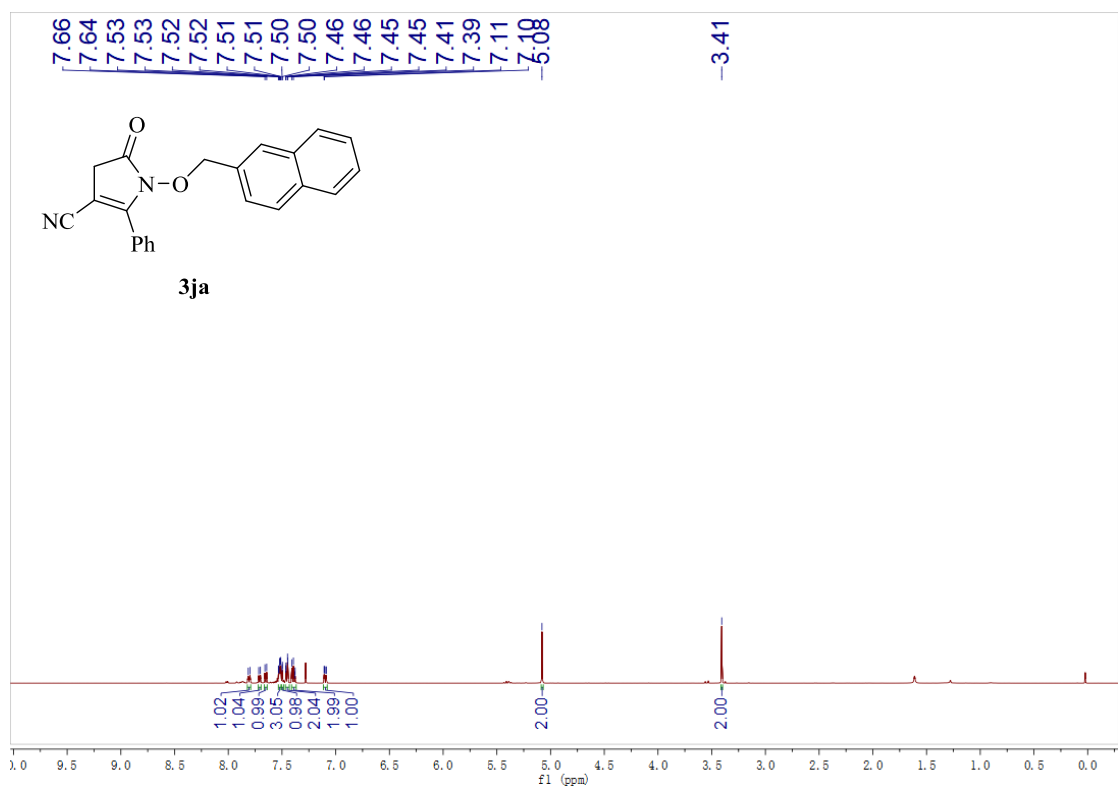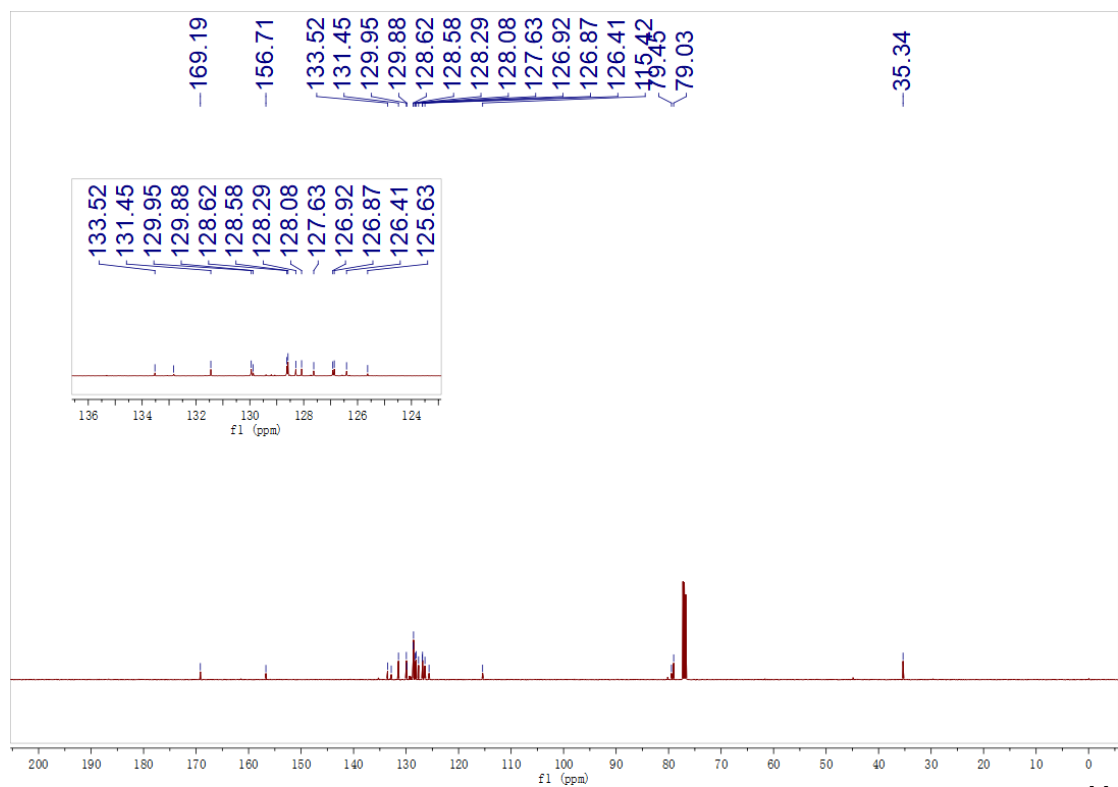

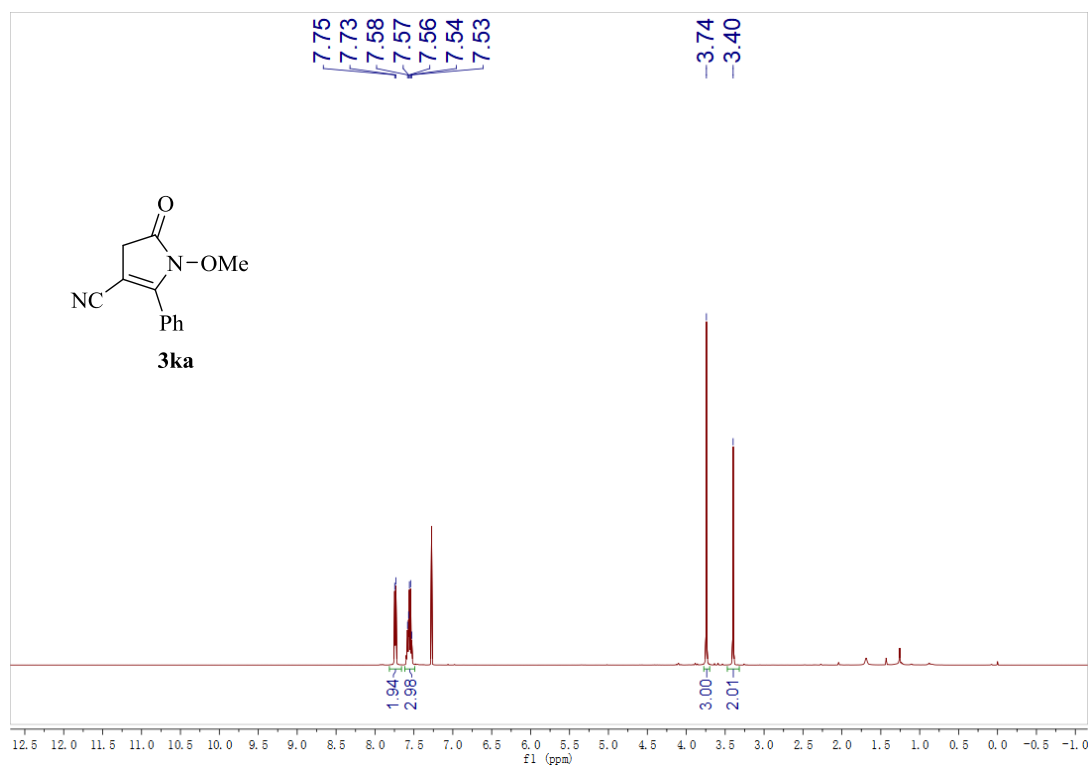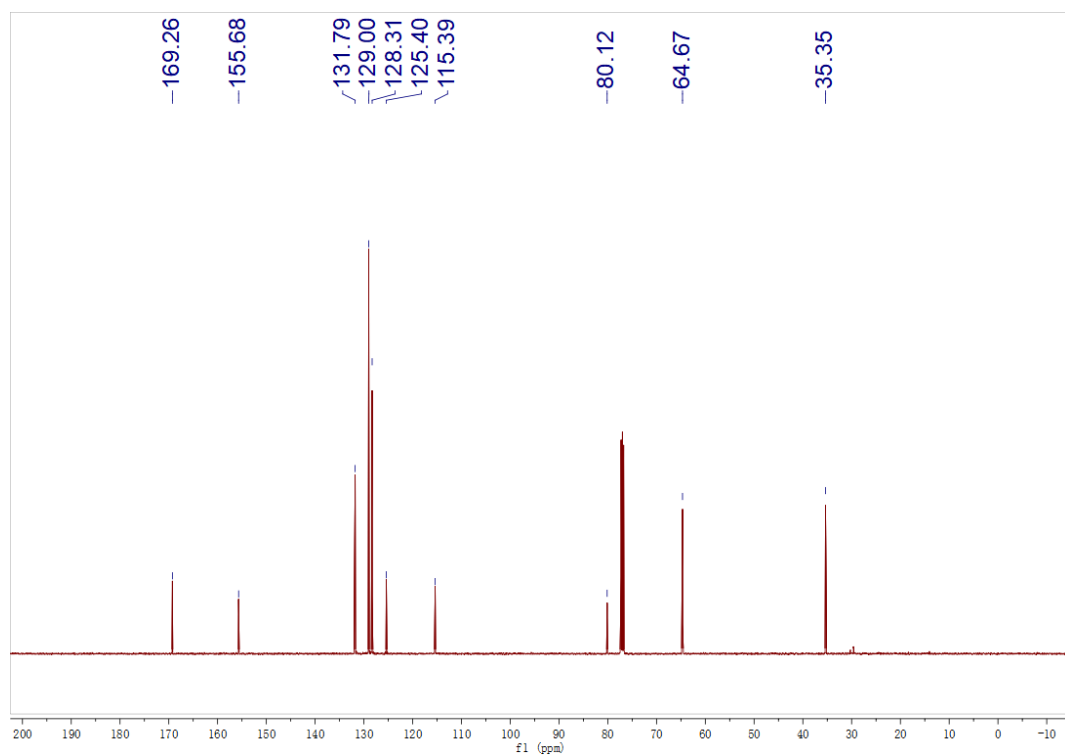

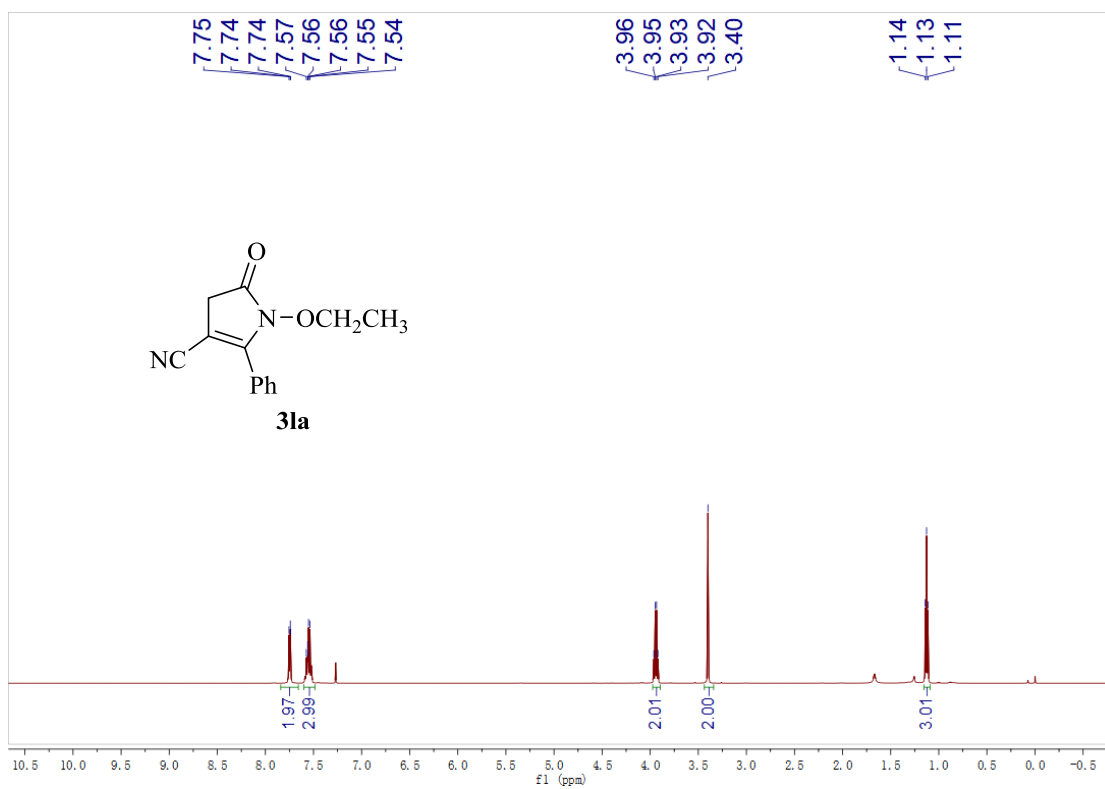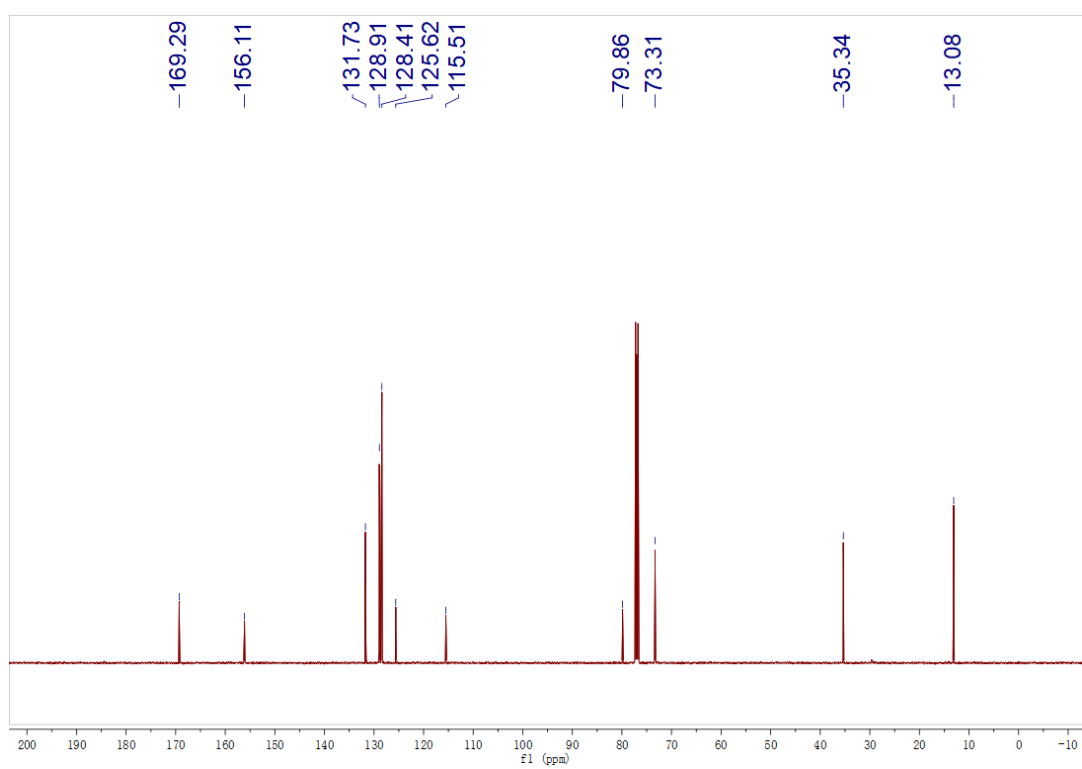

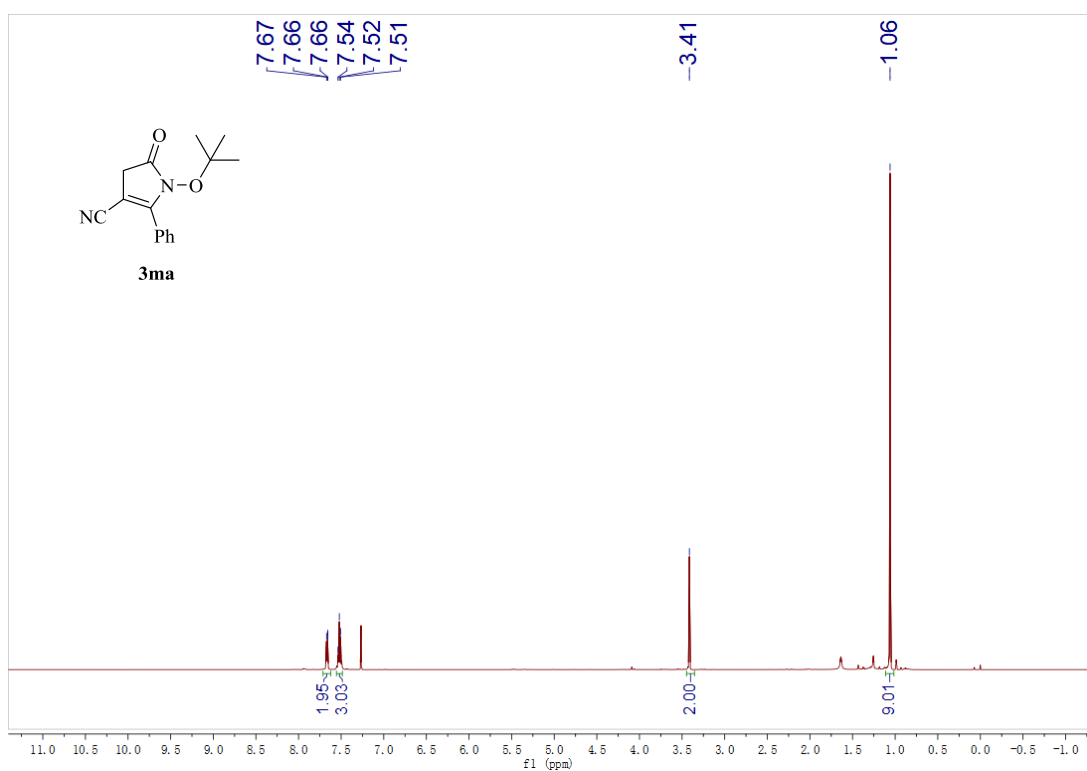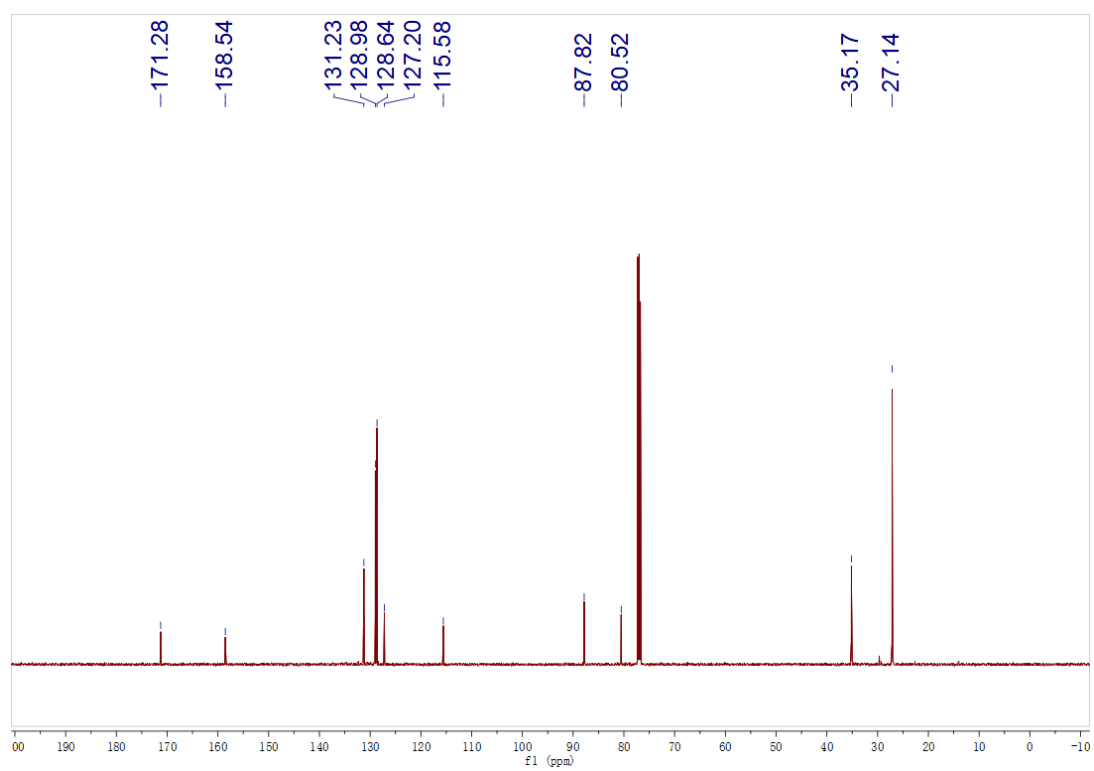

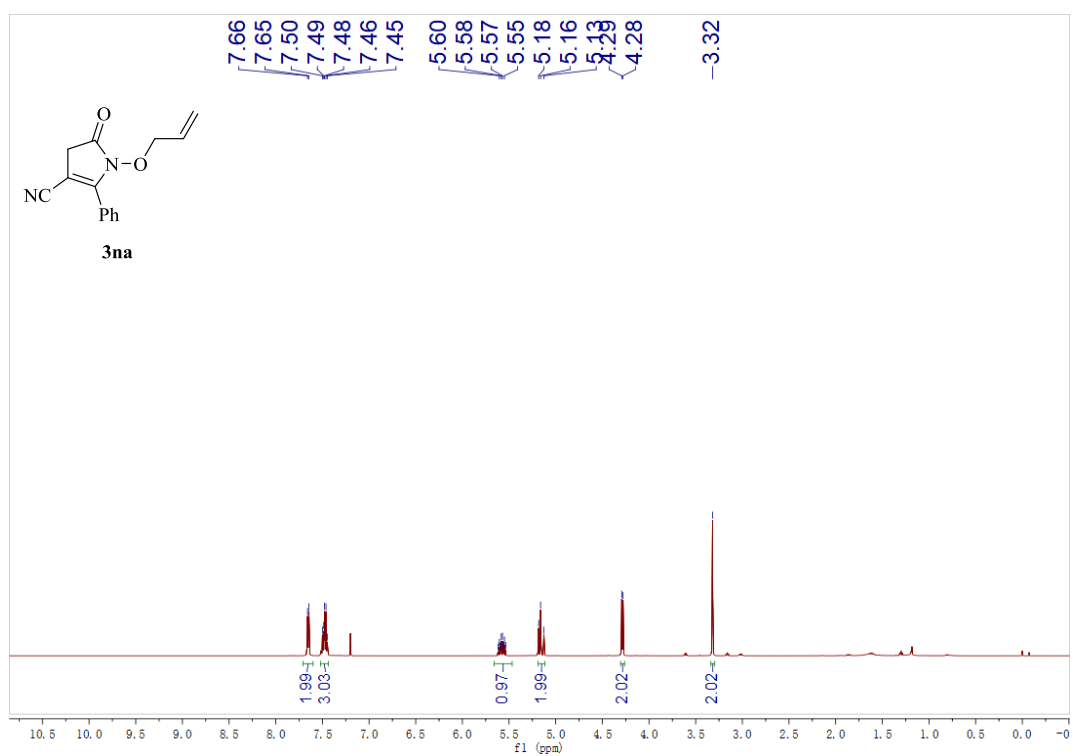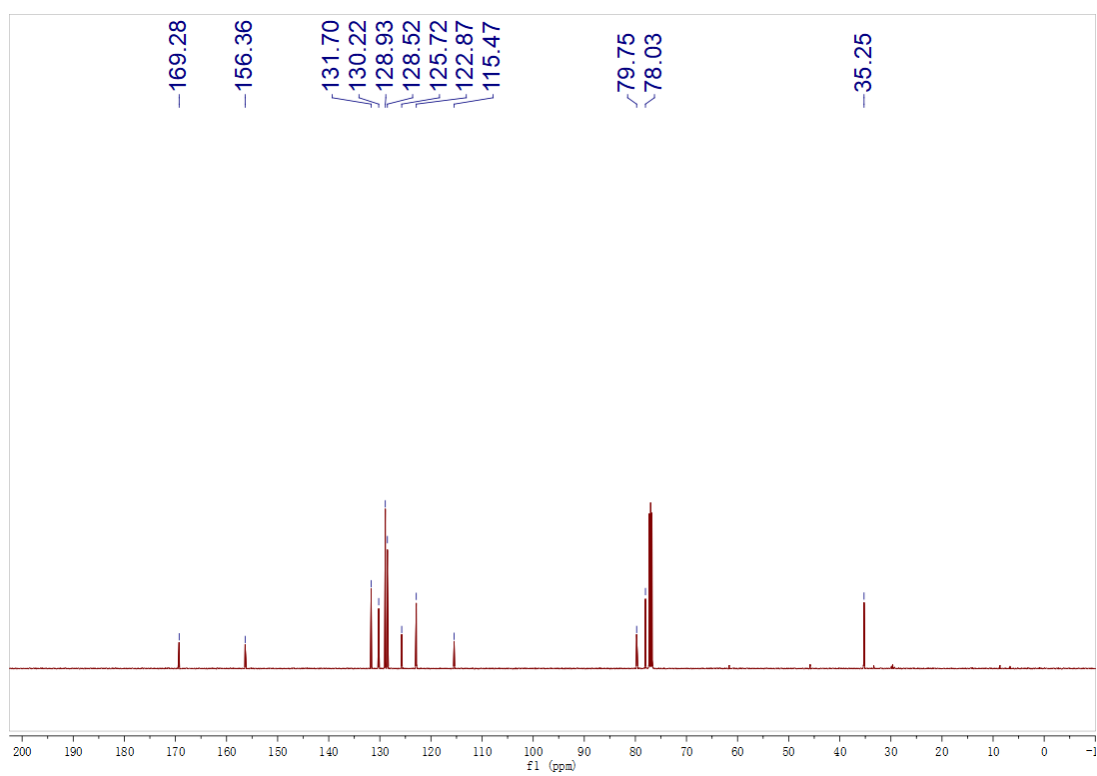

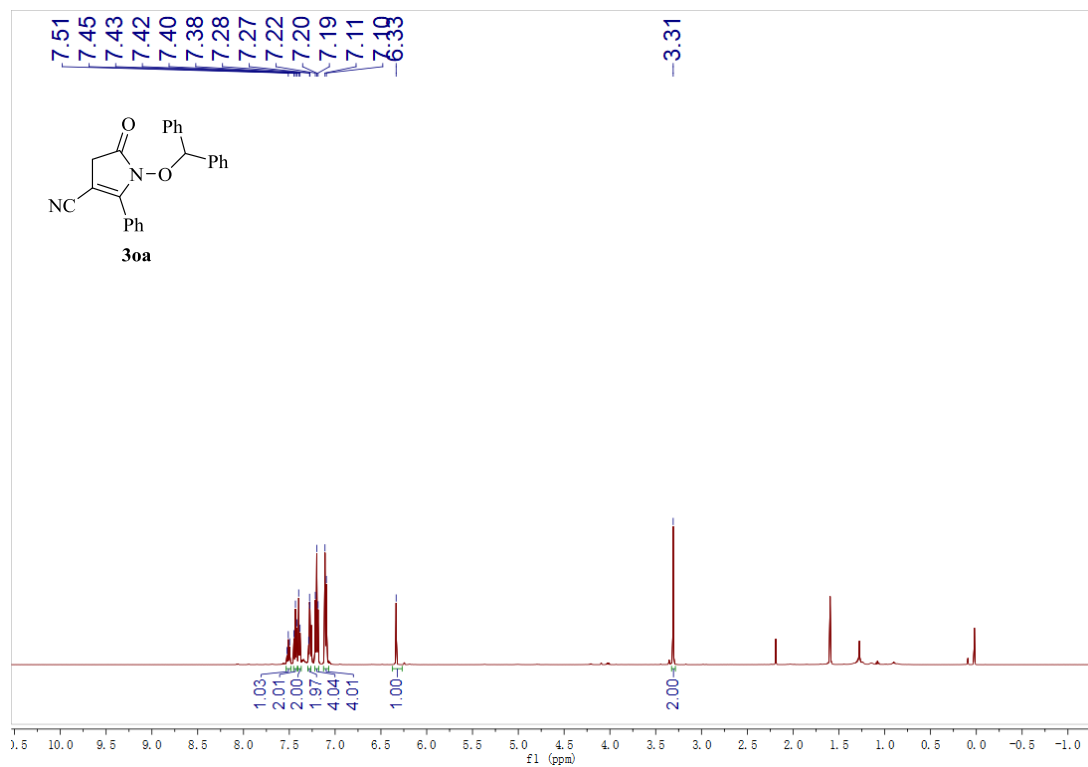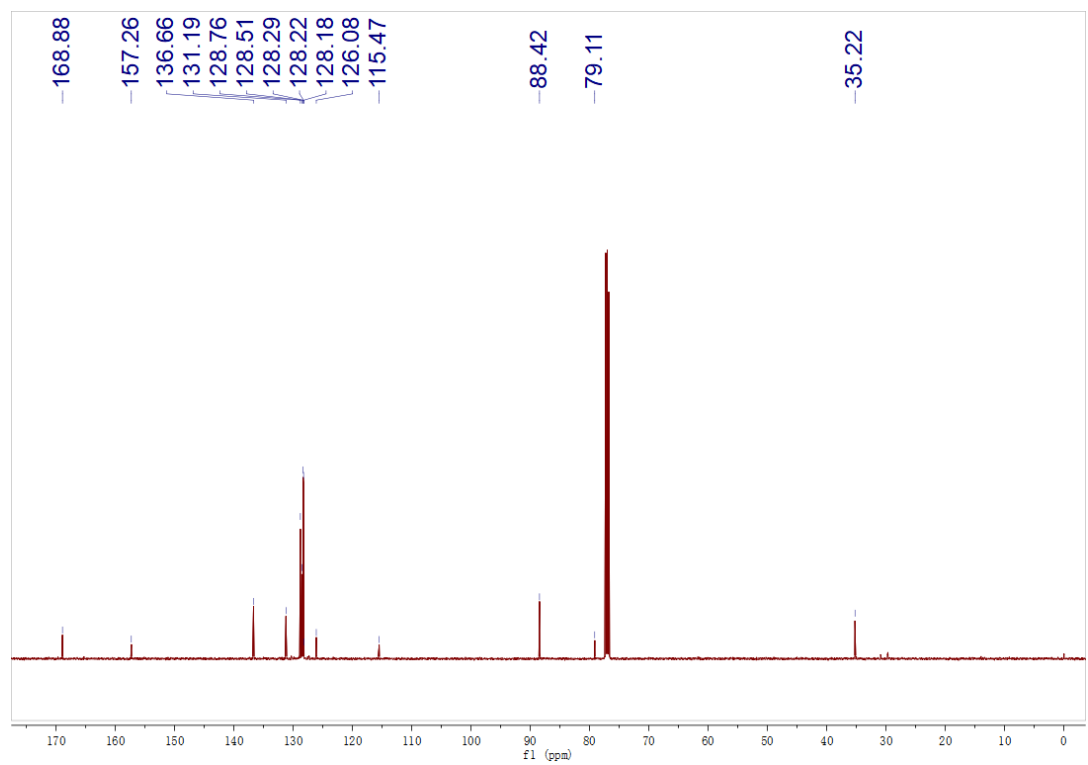

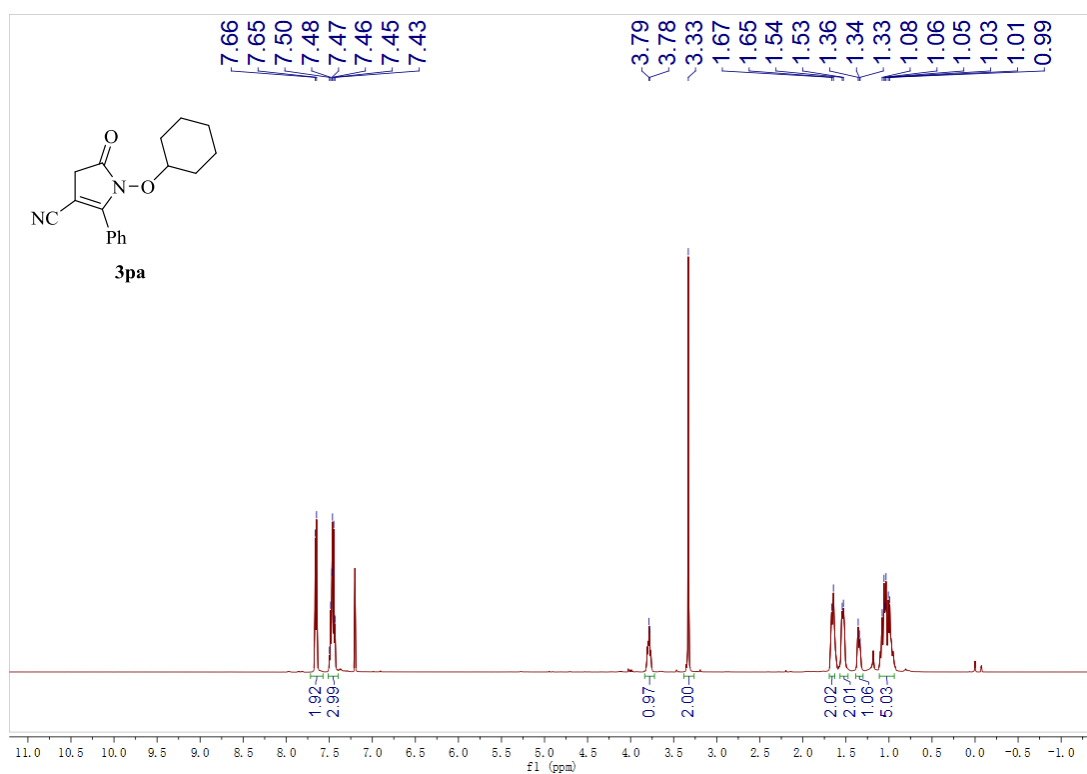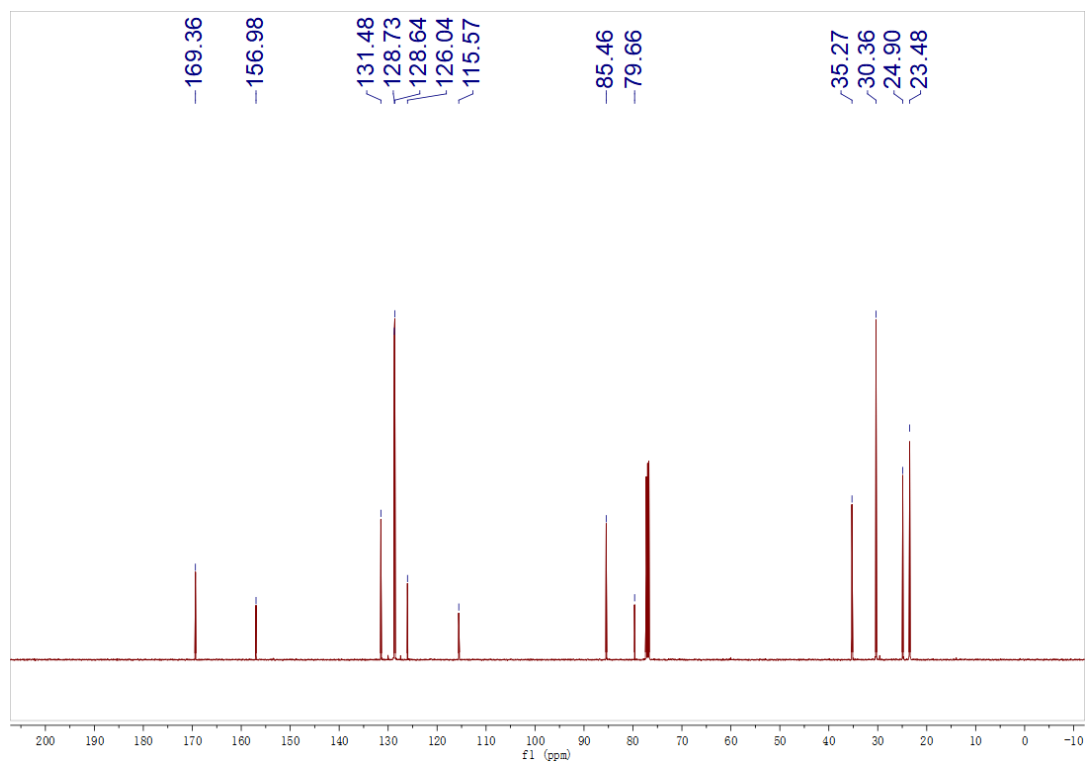

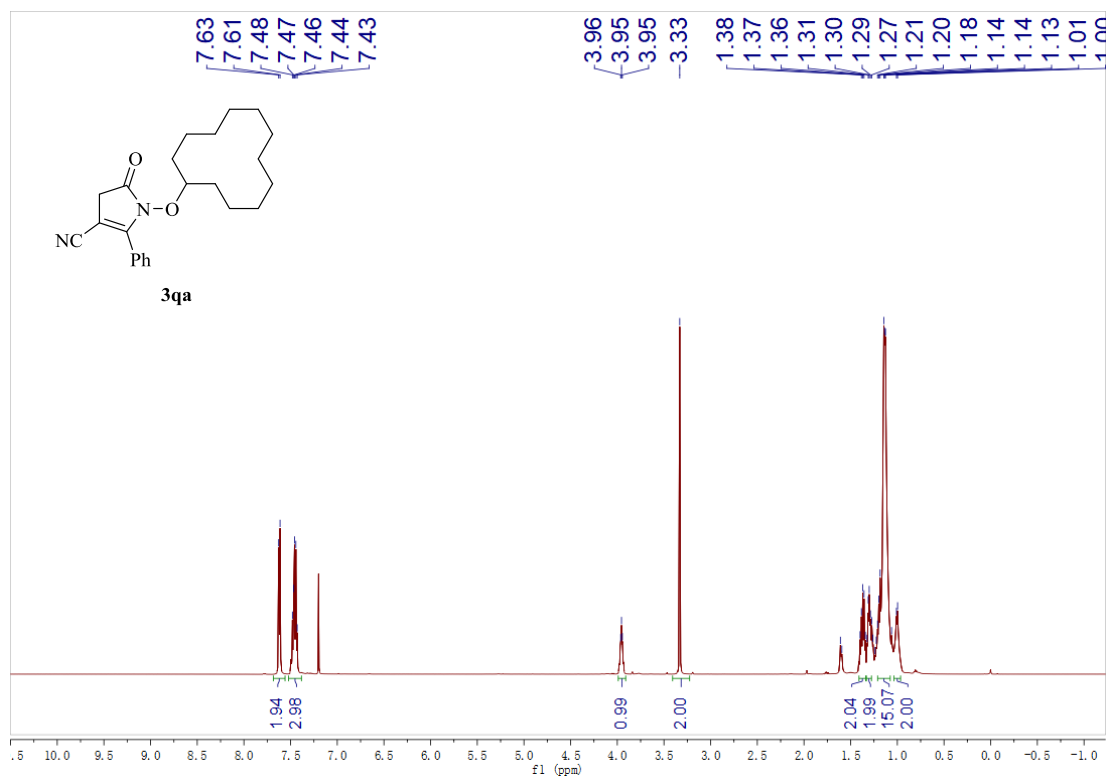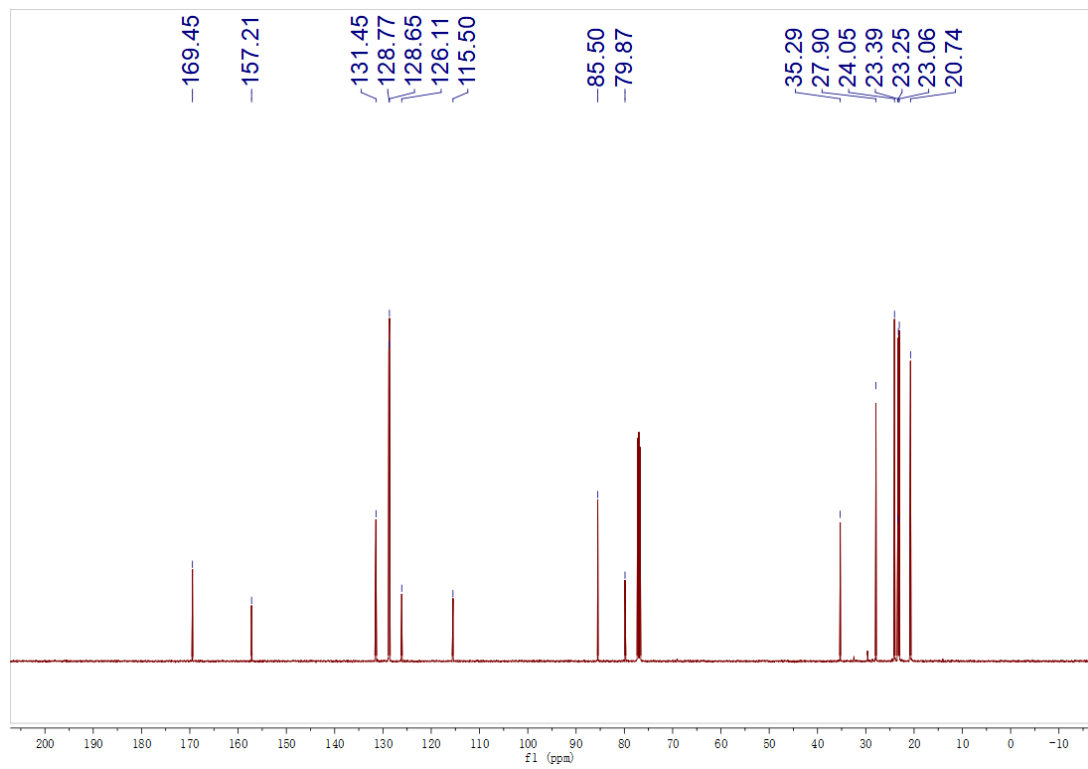

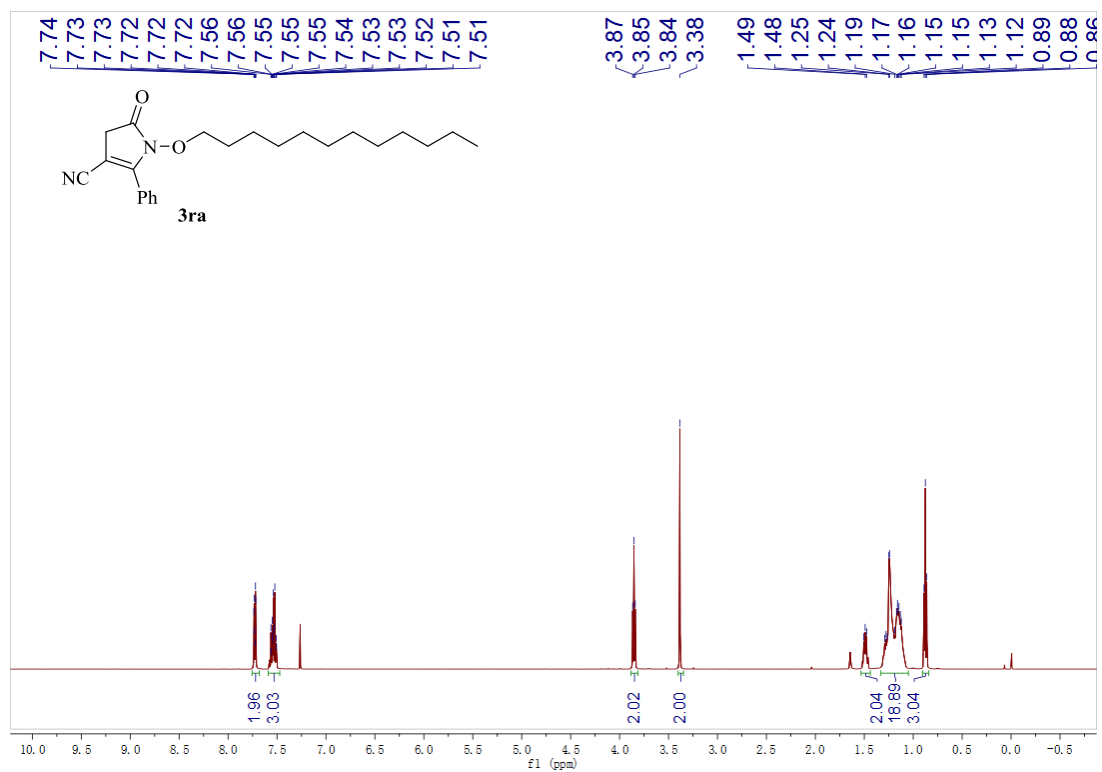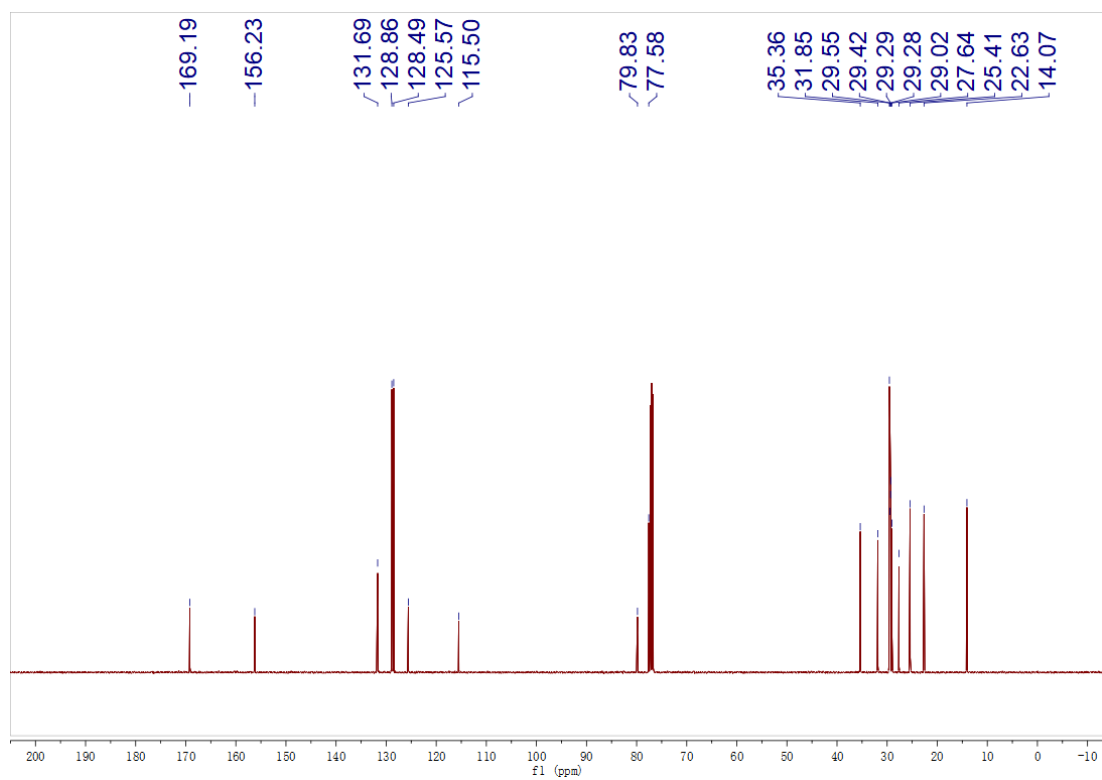

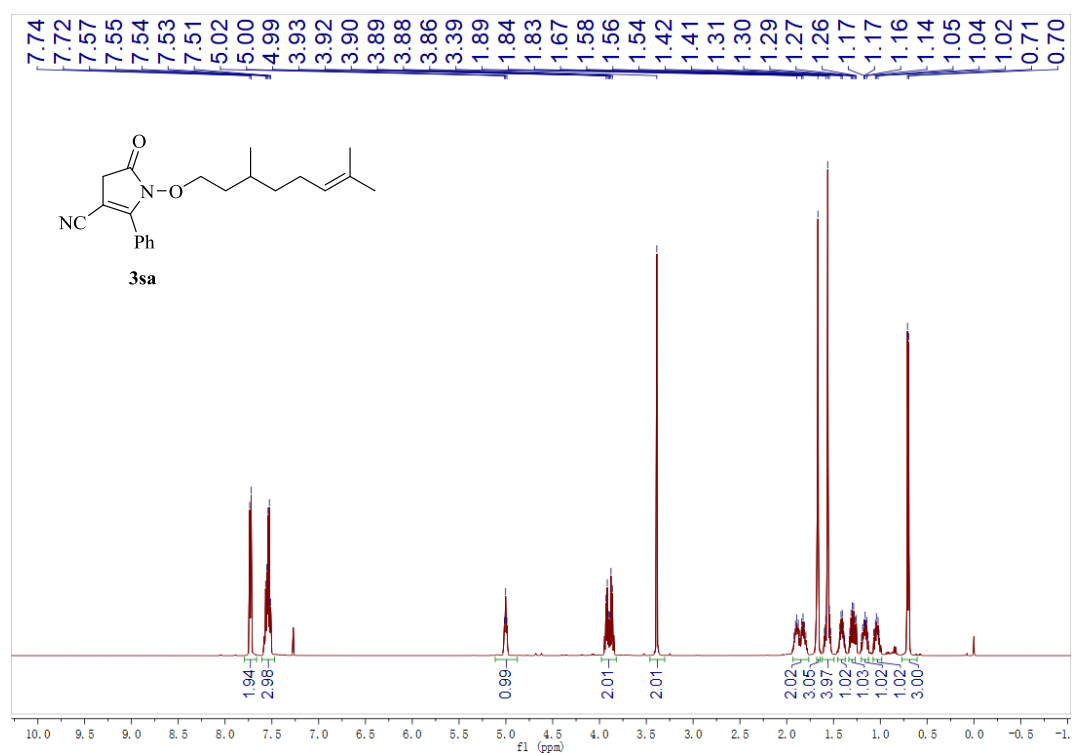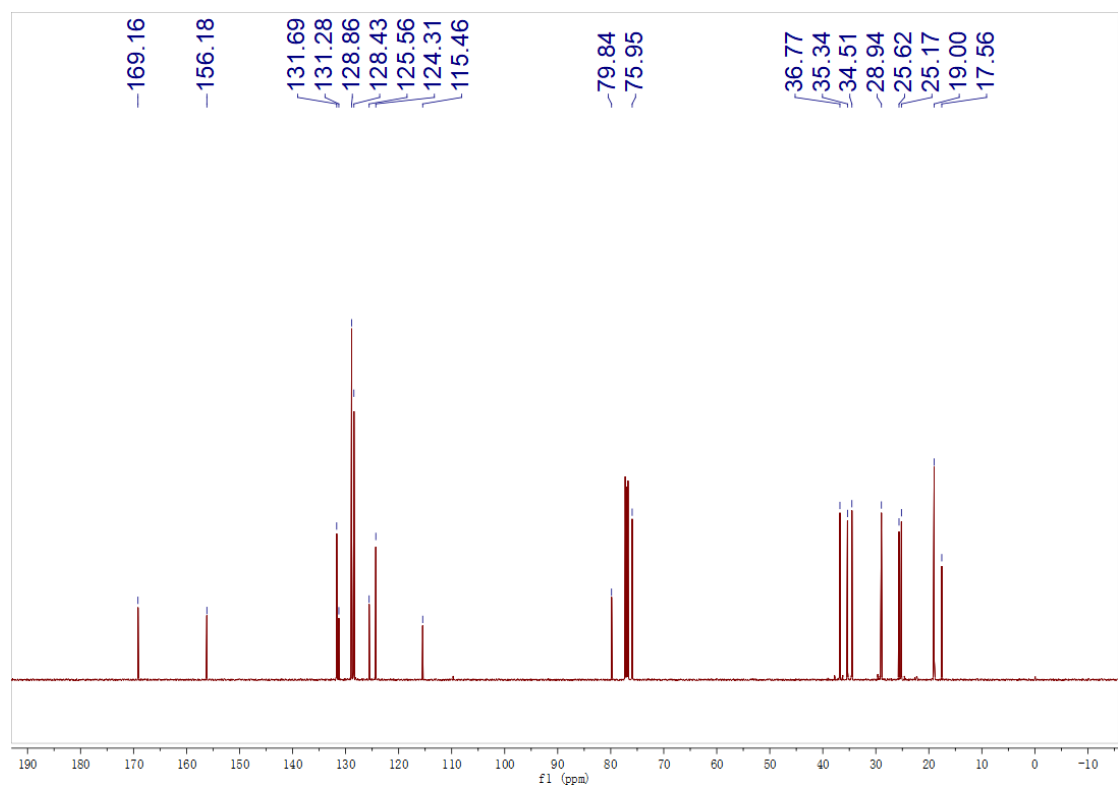

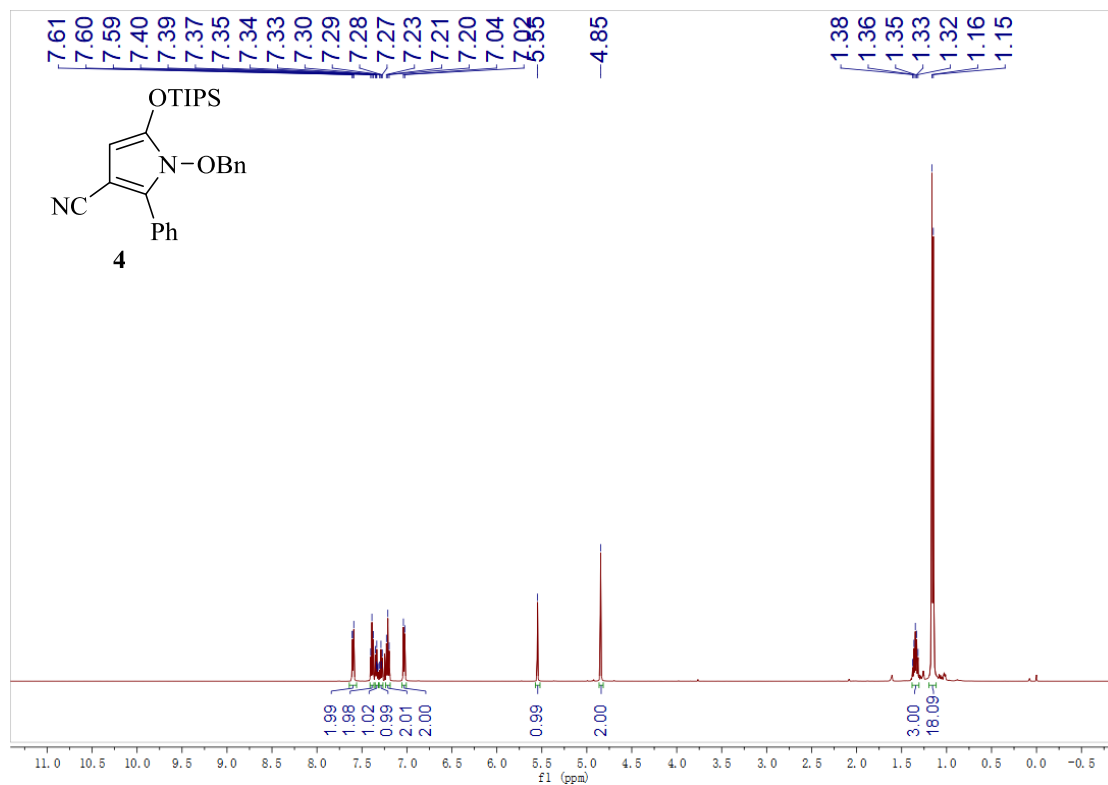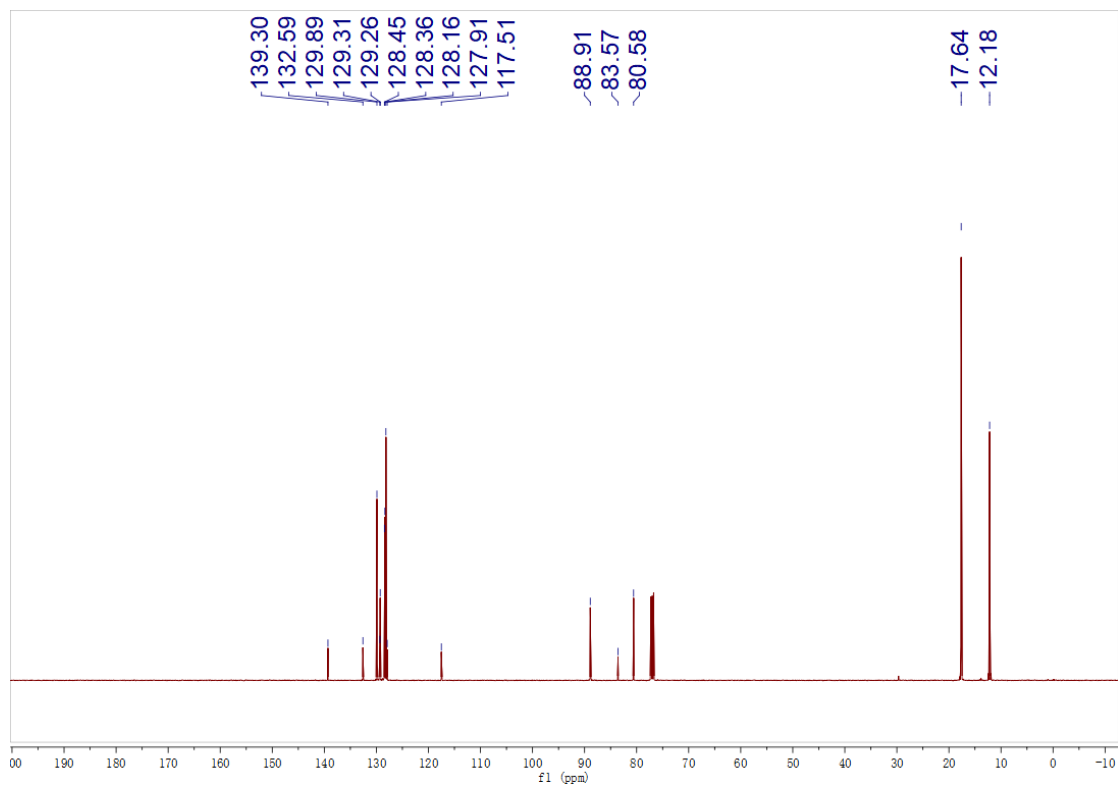

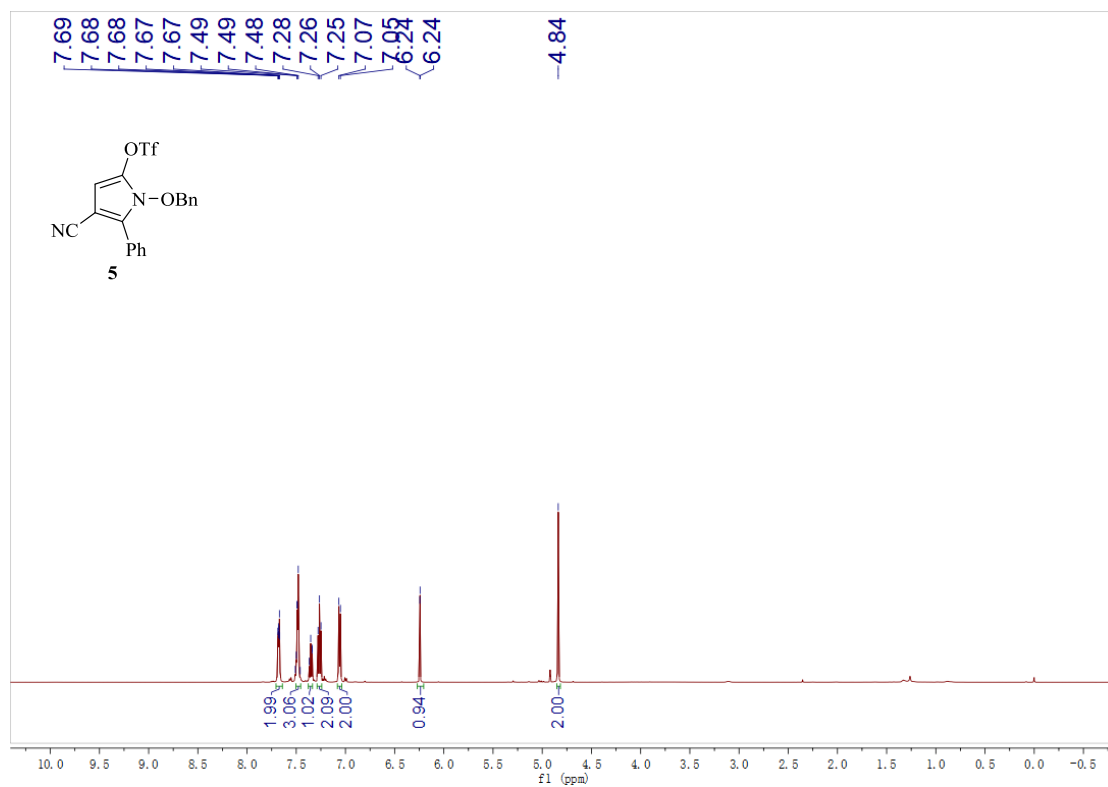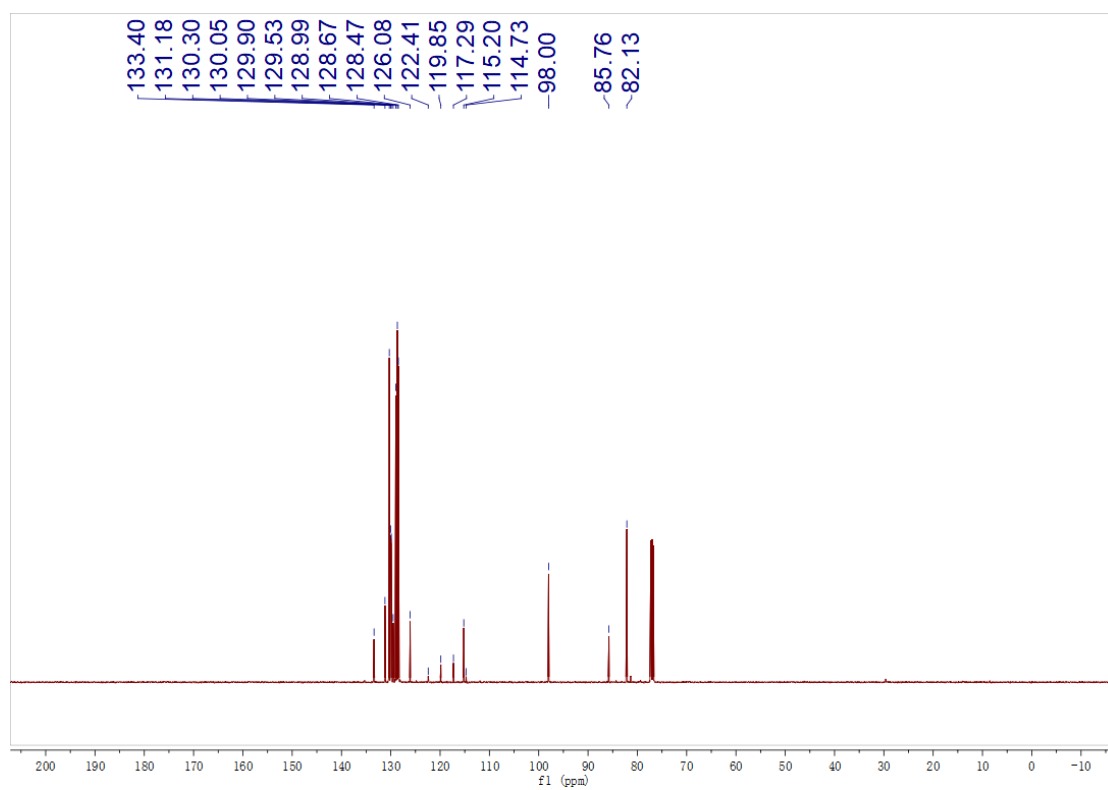

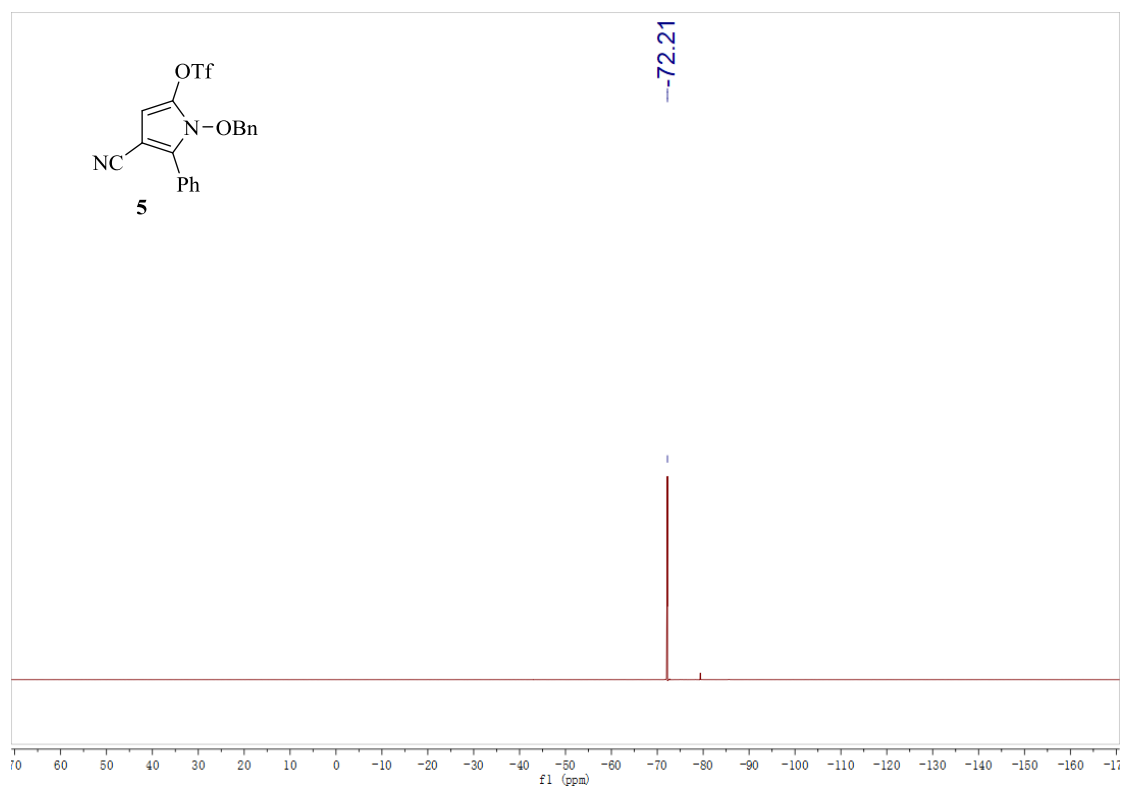

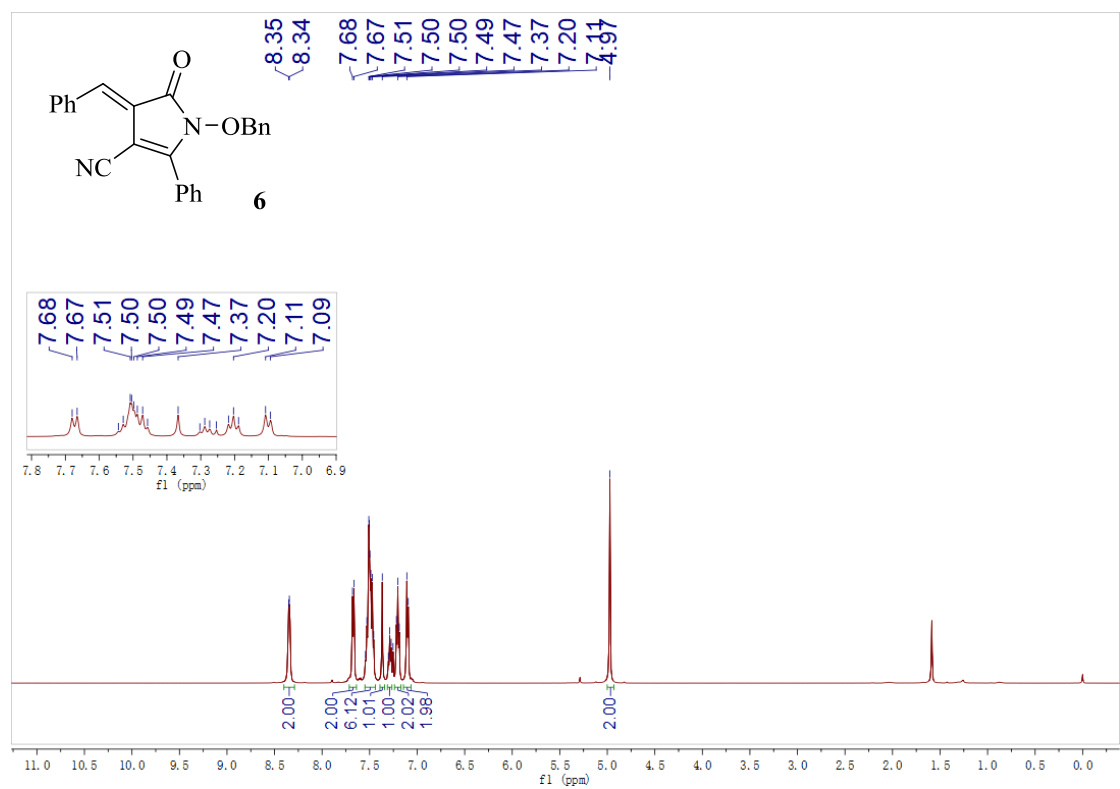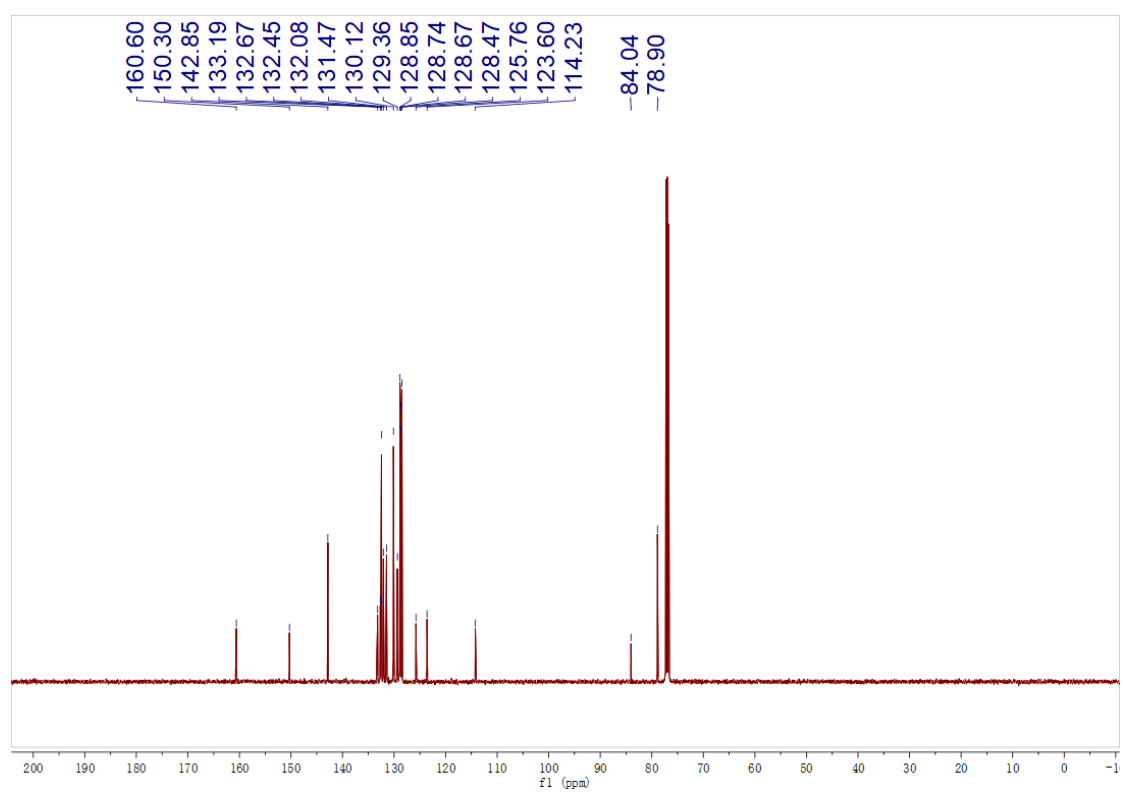

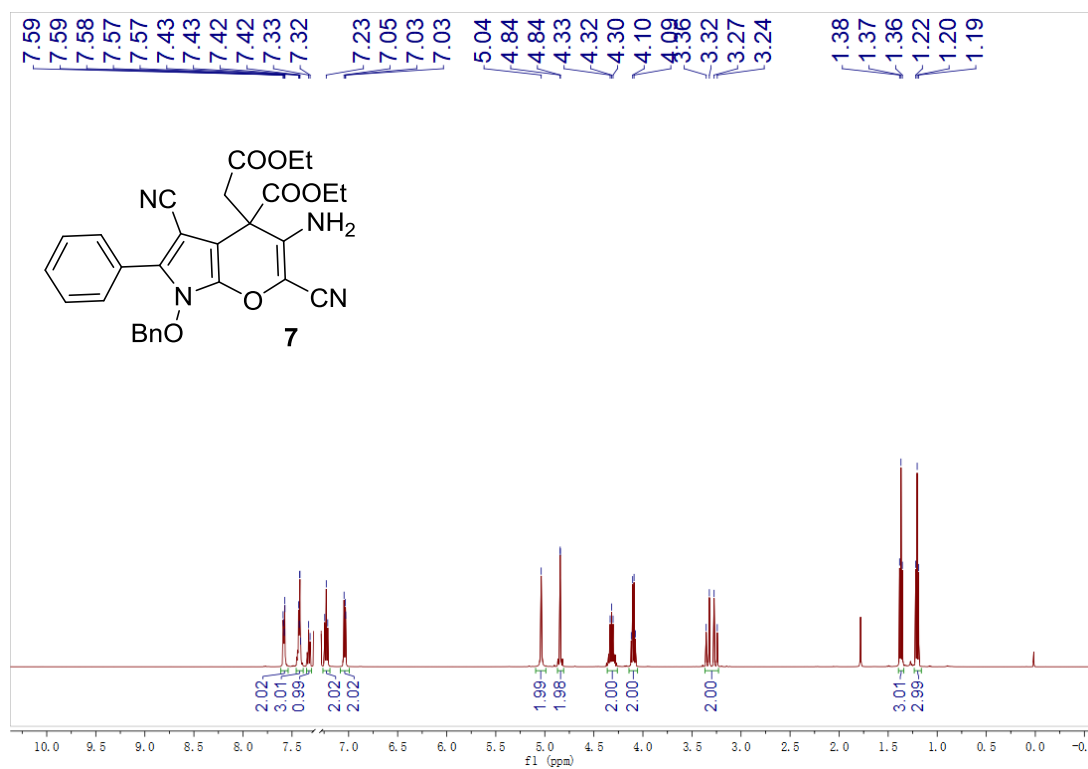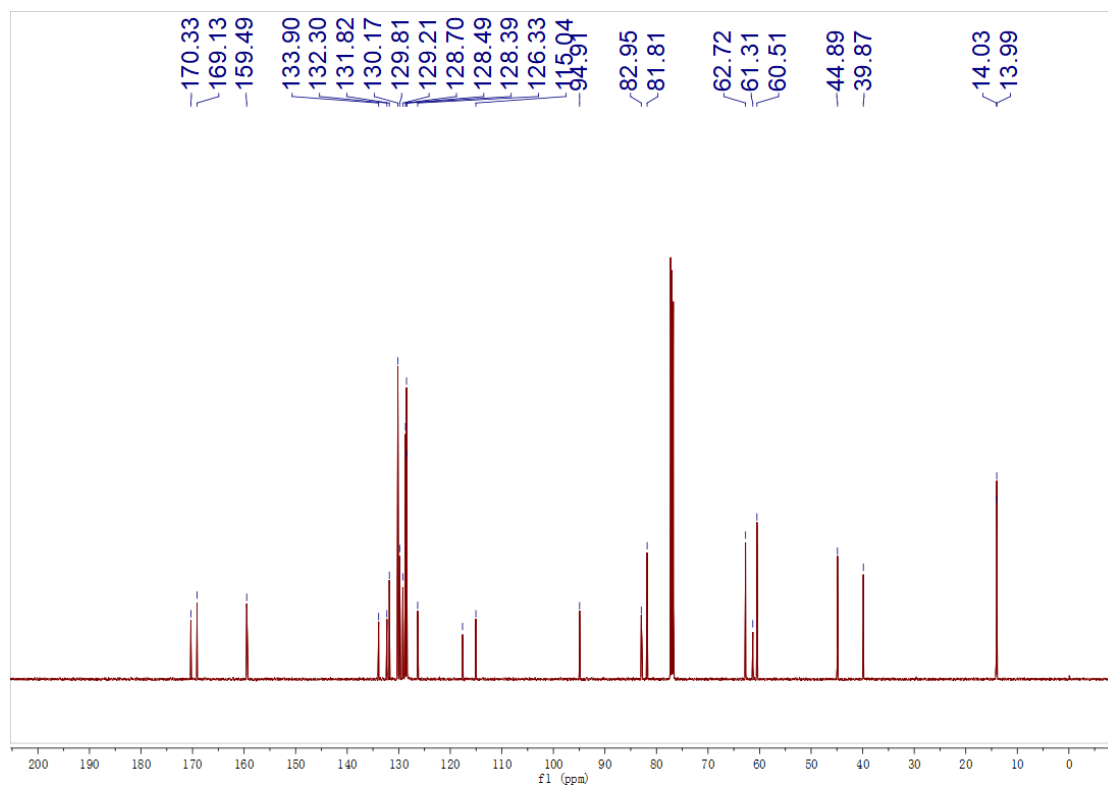

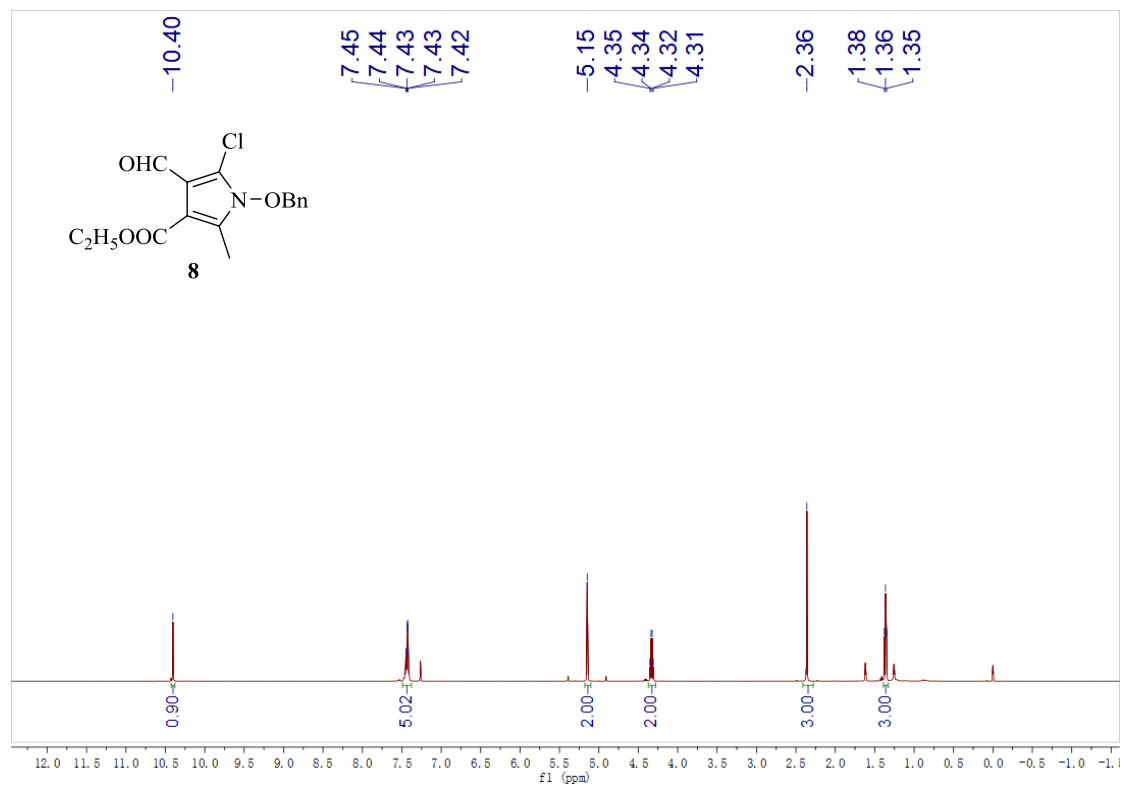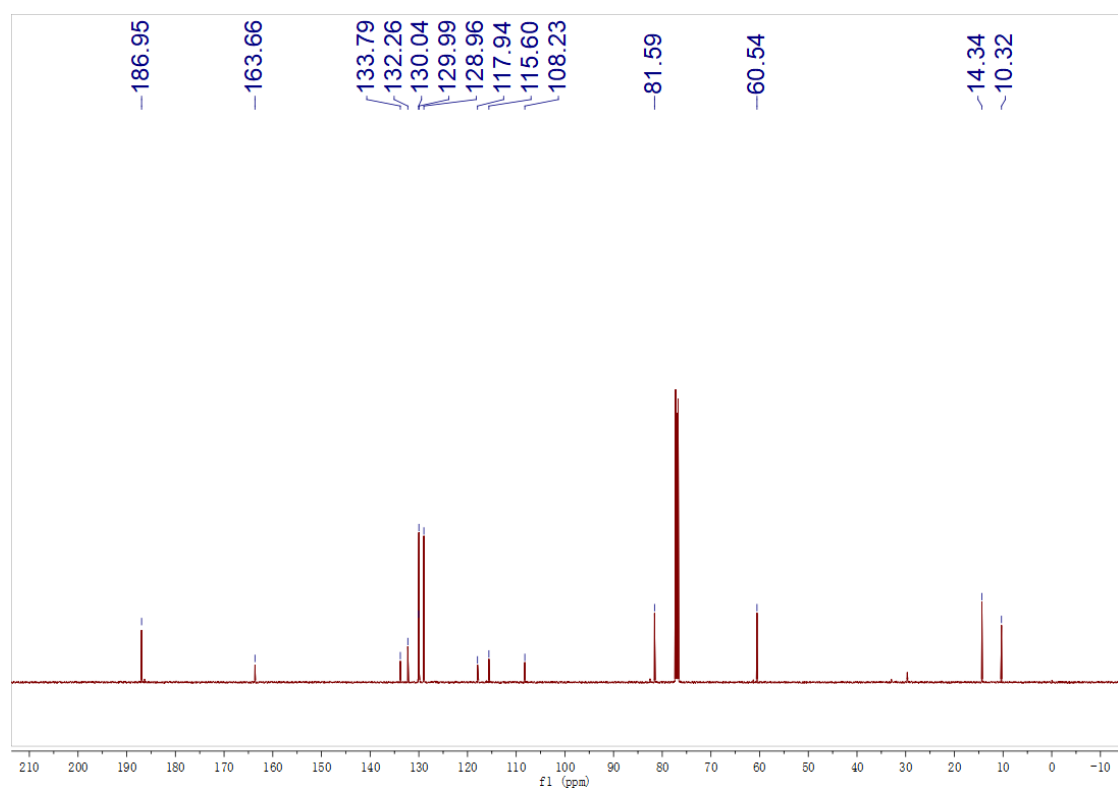

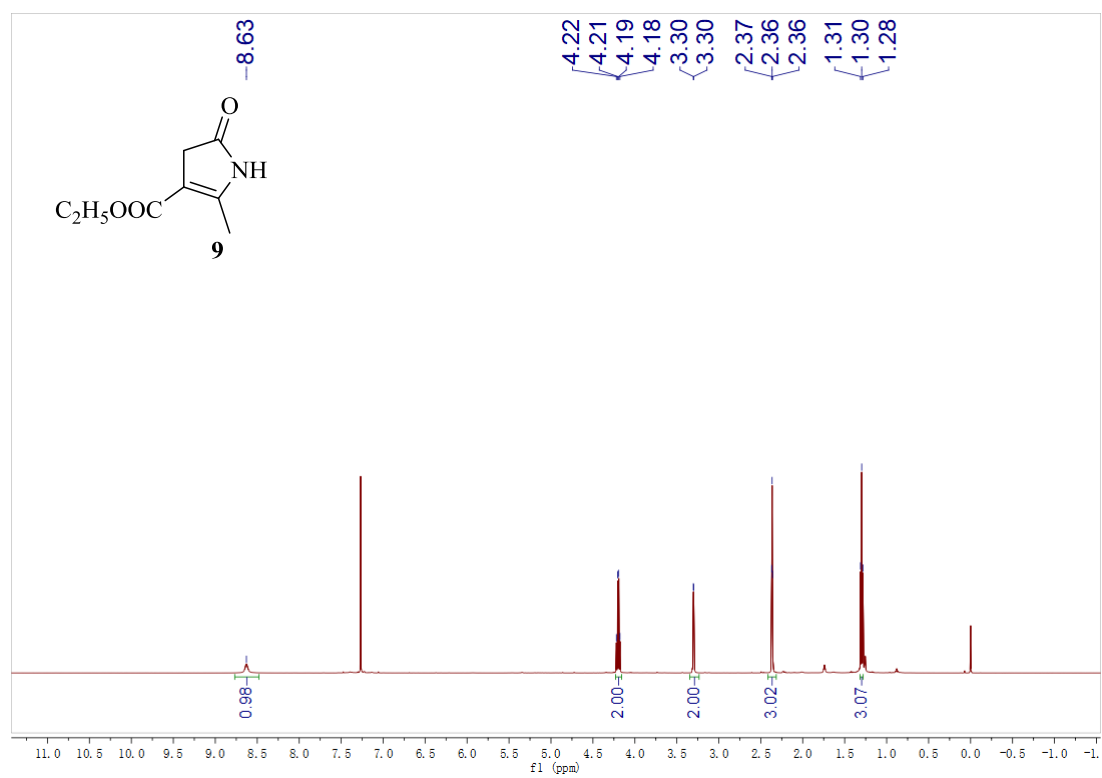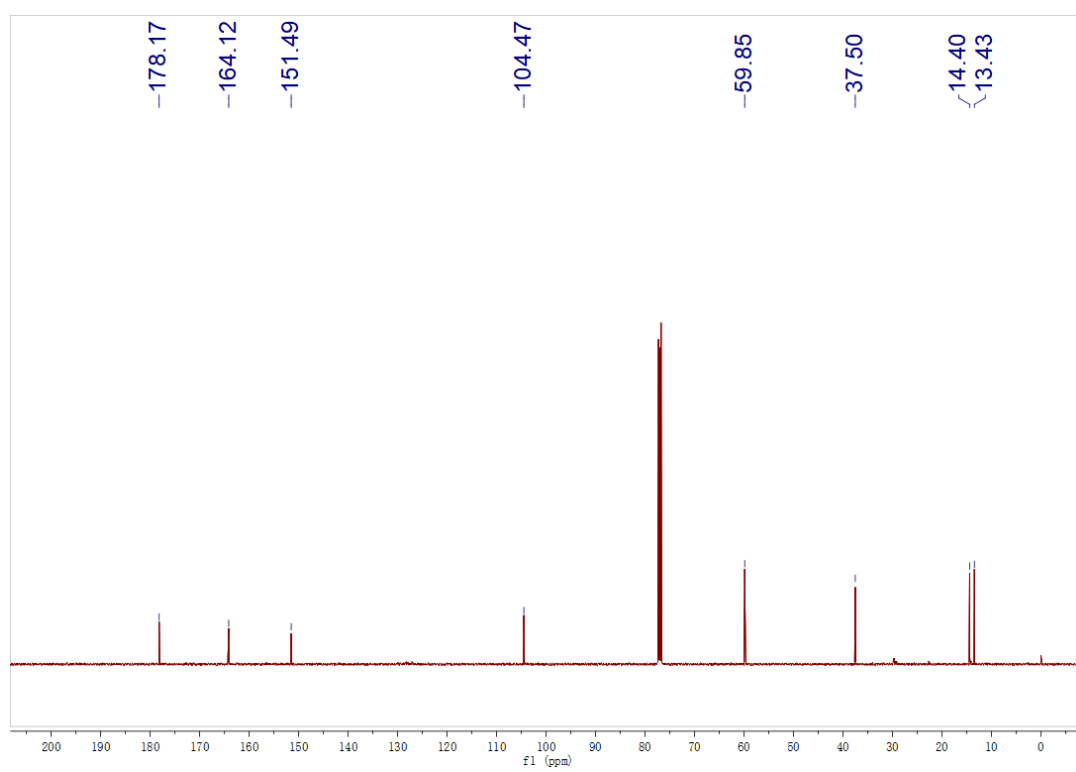

## 5. The crystal structure data of 3aa

**Table S5.** Crystal data and structure refinement for(3aa)(CCDC 2235249)

|                                                                      |                                                               |
|----------------------------------------------------------------------|---------------------------------------------------------------|
| Empirical formula                                                    | C <sub>18</sub> H <sub>14</sub> N <sub>2</sub> O <sub>2</sub> |
| Formula weight                                                       | 290.31                                                        |
| Temperature / K                                                      | 114.85(10)                                                    |
| Crystal system                                                       | monoclinic                                                    |
| Space group                                                          | Cc                                                            |
| a / Å, b / Å, c / Å                                                  | 11.5249(9), 11.4884(10), 22.947(3)                            |
| α/°, β/°, γ/°                                                        | 90.00, 98.346(8), 90.00                                       |
| Volume / Å <sup>3</sup>                                              | 3006.1(5)                                                     |
| Z                                                                    | 8                                                             |
| ρ <sub>calc</sub> / mg mm <sup>-3</sup>                              | 1.283                                                         |
| μ / mm <sup>-1</sup>                                                 | 0.085                                                         |
| F(000)                                                               | 1216                                                          |
| Crystal size / mm <sup>3</sup>                                       | 0.23 × 0.23 × 0.14                                            |
| 2θ range for data collection                                         | 5.88 ° to 51.98 °                                             |
| Index ranges                                                         | -13 ≤ h ≤ 13, -13 ≤ k ≤ 14, -28 ≤ l ≤ 25                      |
| Reflections collected                                                | 6580                                                          |
| Independent reflections                                              | 4406[R(int) = 0.0462 (inf-0.9Å)]                              |
| Data/restraints/parameters                                           | 4406/2/397                                                    |
| Goodness-of-fit on F <sup>2</sup>                                    | 1.023                                                         |
| Final R indexes [I>2σ (I) i.e. F <sub>o</sub> >4σ (F <sub>o</sub> )] | R <sub>1</sub> = 0.0551 wR <sub>2</sub> = 0.1118              |
| Final R indexes [all data]                                           | R <sub>1</sub> = 0.0710, wR <sub>2</sub> = 0.1253             |
| Largest diff. peak/hole / e Å <sup>-3</sup>                          | 0.205/-0.259                                                  |
| Completeness                                                         | 0.9968                                                        |

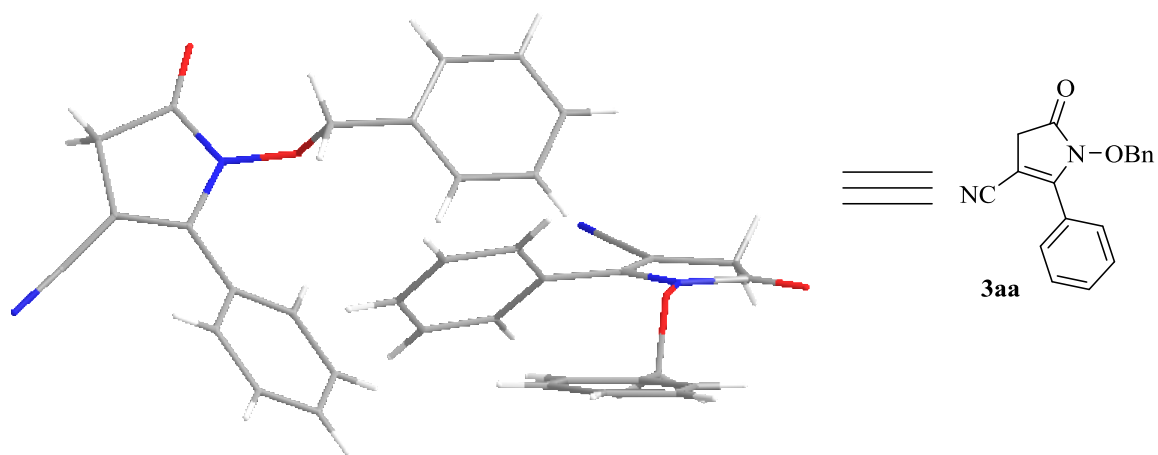

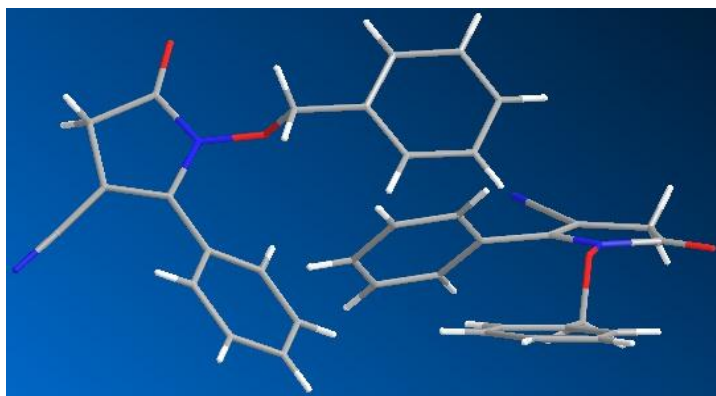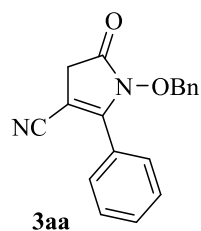

## 6. The crystal structure data of 7

**Table S6.** Crystal data and structure refinement for (7) (CCDC 2267290)

|                                                                         |                                                               |
|-------------------------------------------------------------------------|---------------------------------------------------------------|
| Empirical formula                                                       | C <sub>29</sub> H <sub>26</sub> N <sub>4</sub> O <sub>6</sub> |
| Formula weight                                                          | 526.54                                                        |
| Temperature / K                                                         | 118.25(10)                                                    |
| Crystal system                                                          | triclinic                                                     |
| Space group                                                             | P-1                                                           |
| a / Å, b / Å, c / Å                                                     | 8.3944(5), 10.9479(8), 15.5175(9)                             |
| α/°, β/°, γ/°                                                           | 76.896(6), 86.581(5), 70.851(6)                               |
| Volume / Å <sup>3</sup>                                                 | 1311.91(14)                                                   |
| Z                                                                       | 2                                                             |
| ρ <sub>calc</sub> / mg mm <sup>-3</sup>                                 | 1.333                                                         |
| μ / mm <sup>-1</sup>                                                    | 0.095                                                         |
| F(000)                                                                  | 552                                                           |
| Crystal size / mm <sup>3</sup>                                          | 0.35 × 0.33 × 0.11                                            |
| 2θ range for data collection                                            | 5.84 ° to 52 °                                                |
| Index ranges                                                            | -7 ≤ h ≤ 10, -9 ≤ k ≤ 13, -19 ≤ l ≤ 19                        |
| Reflections collected                                                   | 9361                                                          |
| Independent reflections                                                 | 5020 [R(int) = 0.0534]                                        |
| Data/restraints/parameters                                              | 5020/2/354                                                    |
| Goodness-of-fit on F <sup>2</sup>                                       | 1.021                                                         |
| Final R indexes [I > 2σ (I) i.e. F <sub>o</sub> > 4σ (F <sub>o</sub> )] | R <sub>1</sub> = 0.0764, wR <sub>2</sub> = 0.1665             |
| Final R indexes [all data]                                              | R <sub>1</sub> = 0.1261, wR <sub>2</sub> = 0.2052             |
| Largest diff. peak/hole / e Å <sup>-3</sup>                             | 0.699/-0.334                                                  |
| Completeness                                                            | 0.9981                                                        |

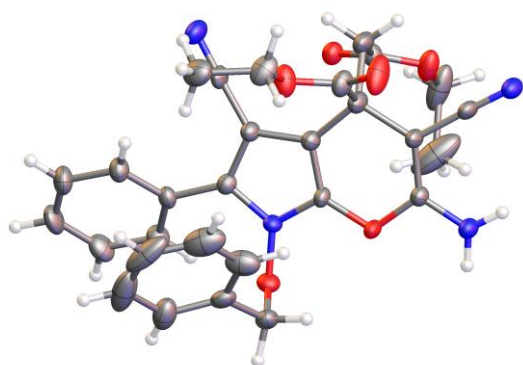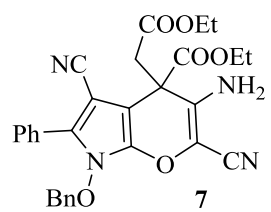

Supplement: d3ob01140b1.pdf [file d3ob01140b1.pdf]
